# Supplementary material for: Novel Chrysin-De-Allyl PAC-1 Hybrid Analogues as Anticancer Compounds: Design, Synthesis, and Biological Evaluation
Source: MDPI journal article supplement (doi:10.3390/molecules25133063), 2020-07-04
Supplement: s1 [file s1]

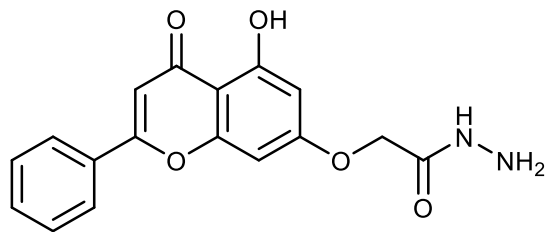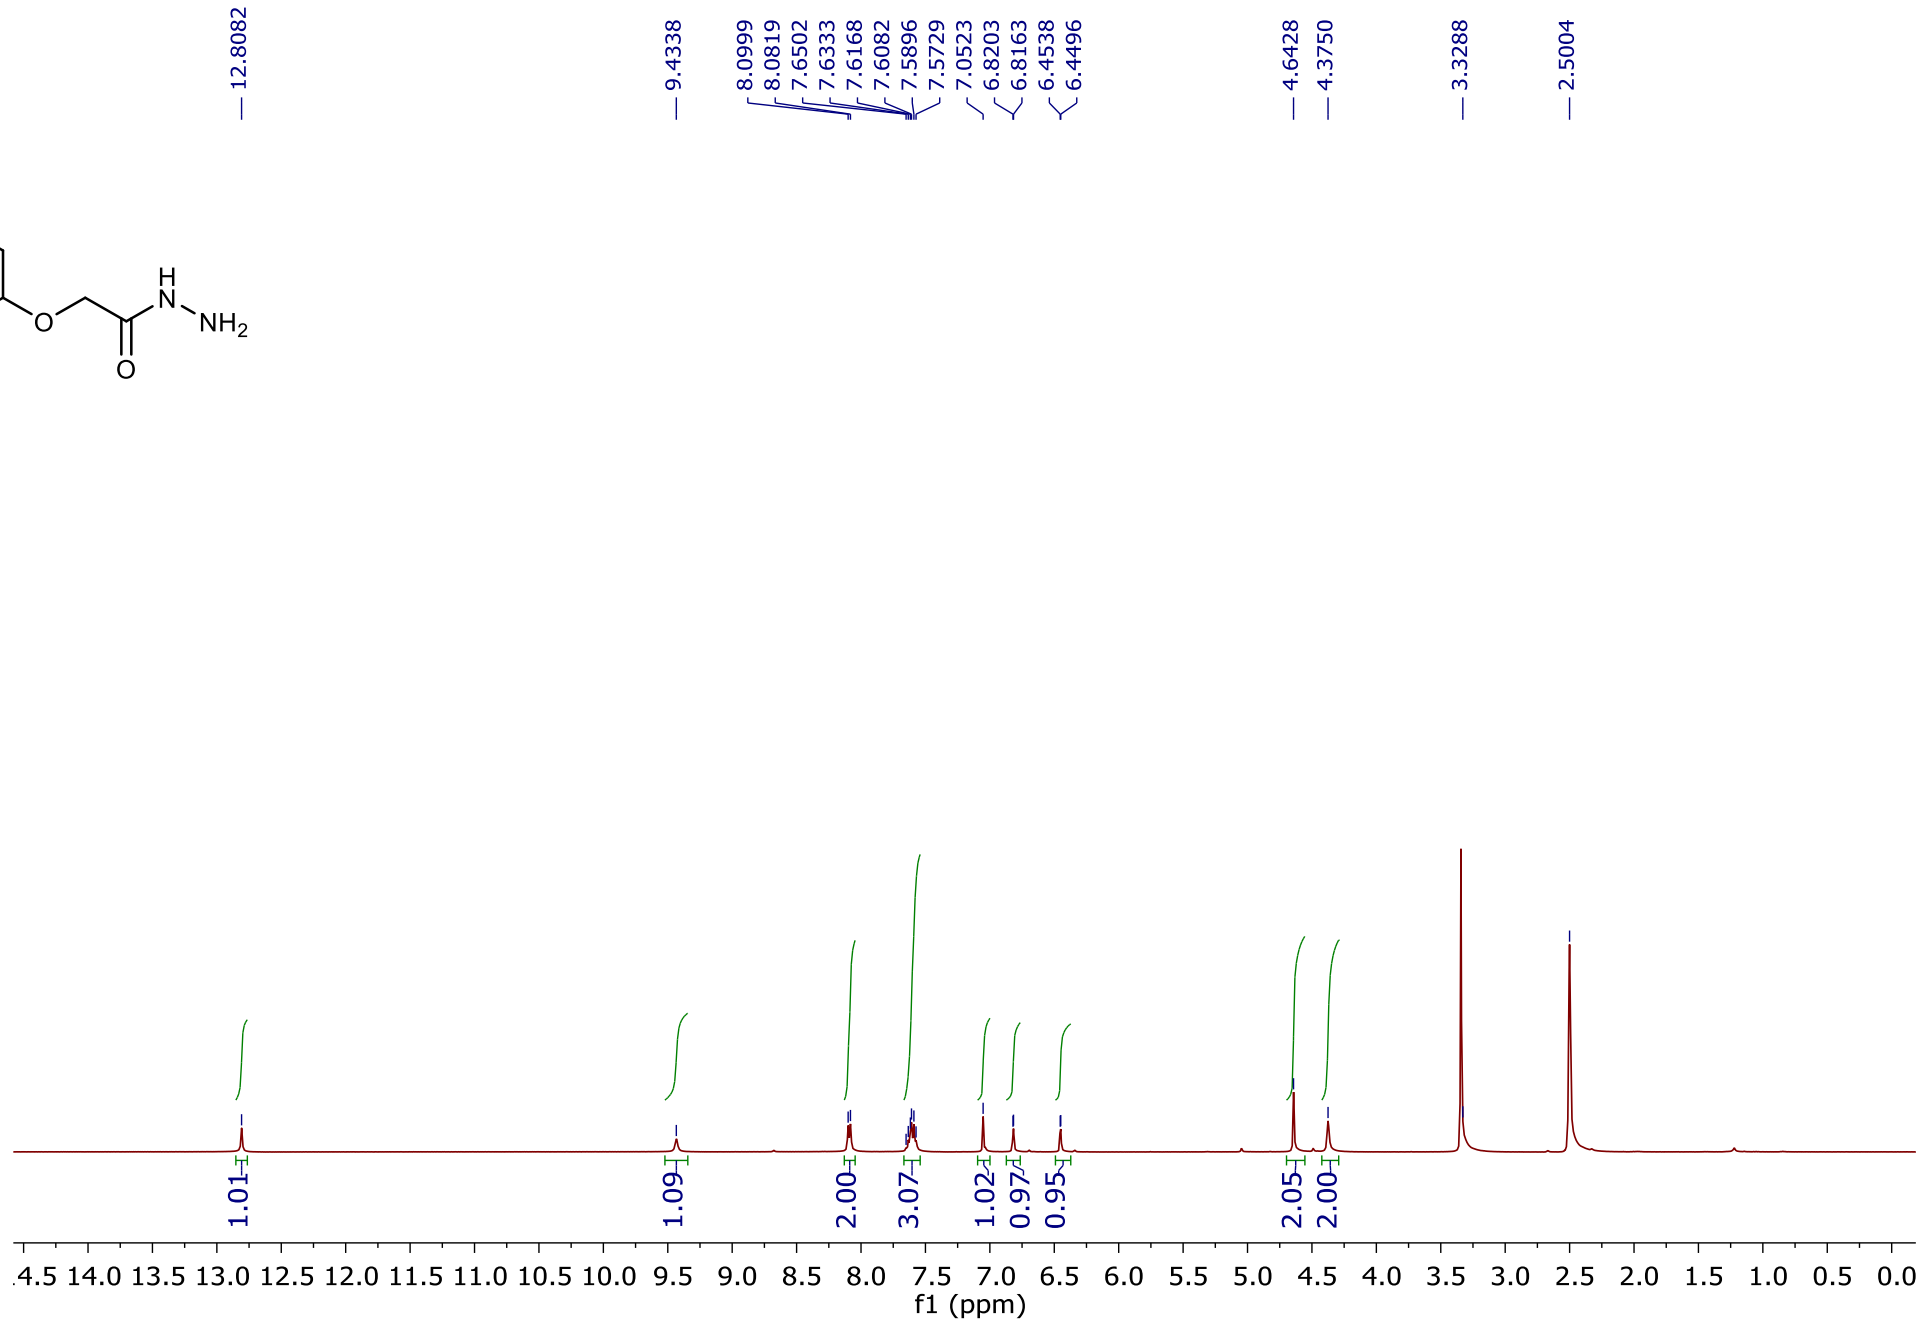

S1. <sup>1</sup>H NMR of Compound 3

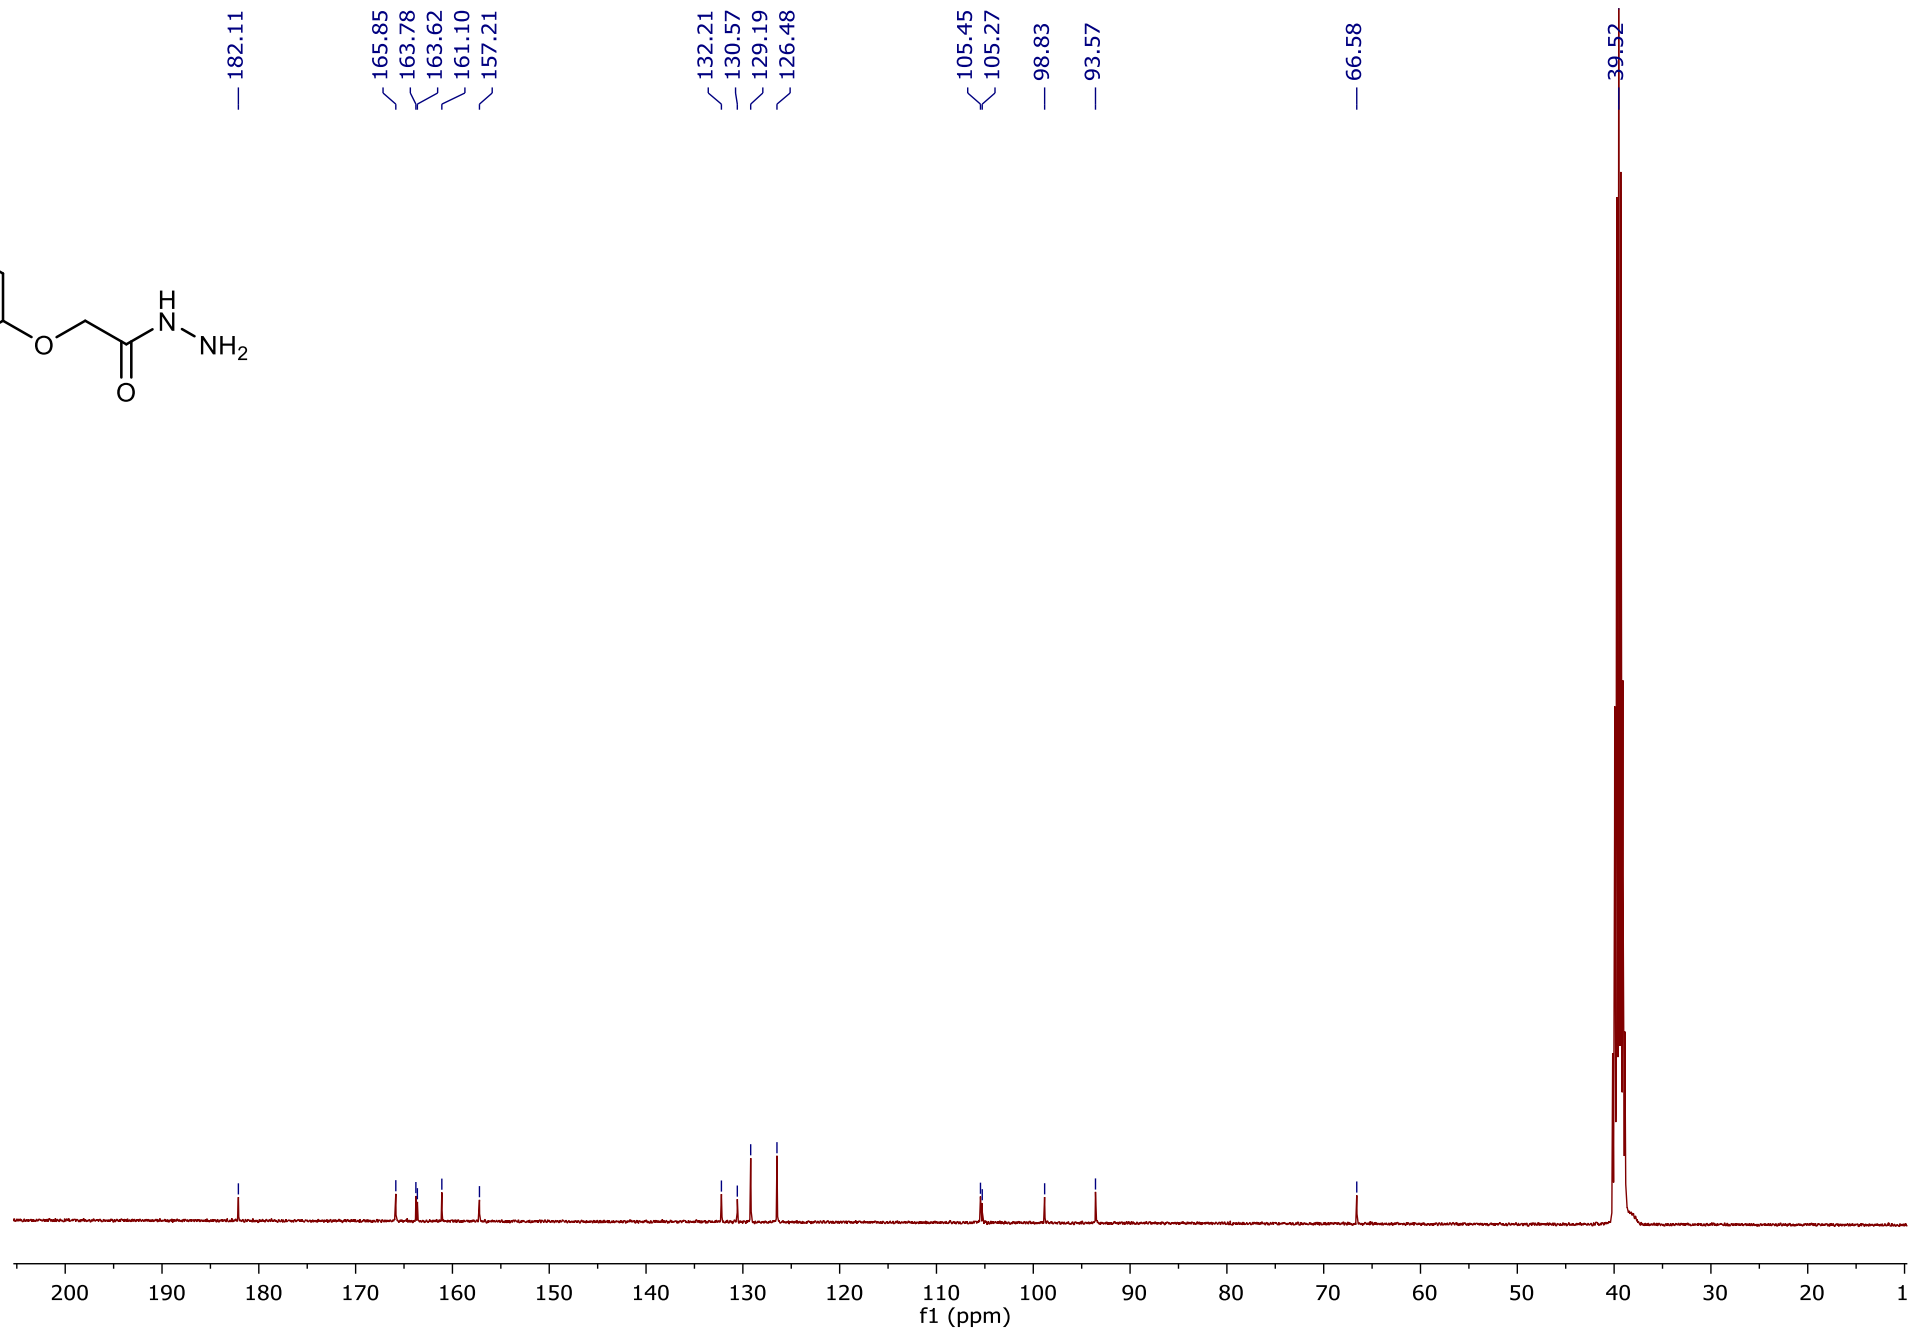

S2. <sup>13</sup>C NMR of Compound 3

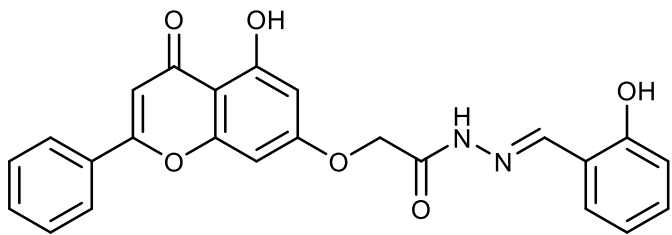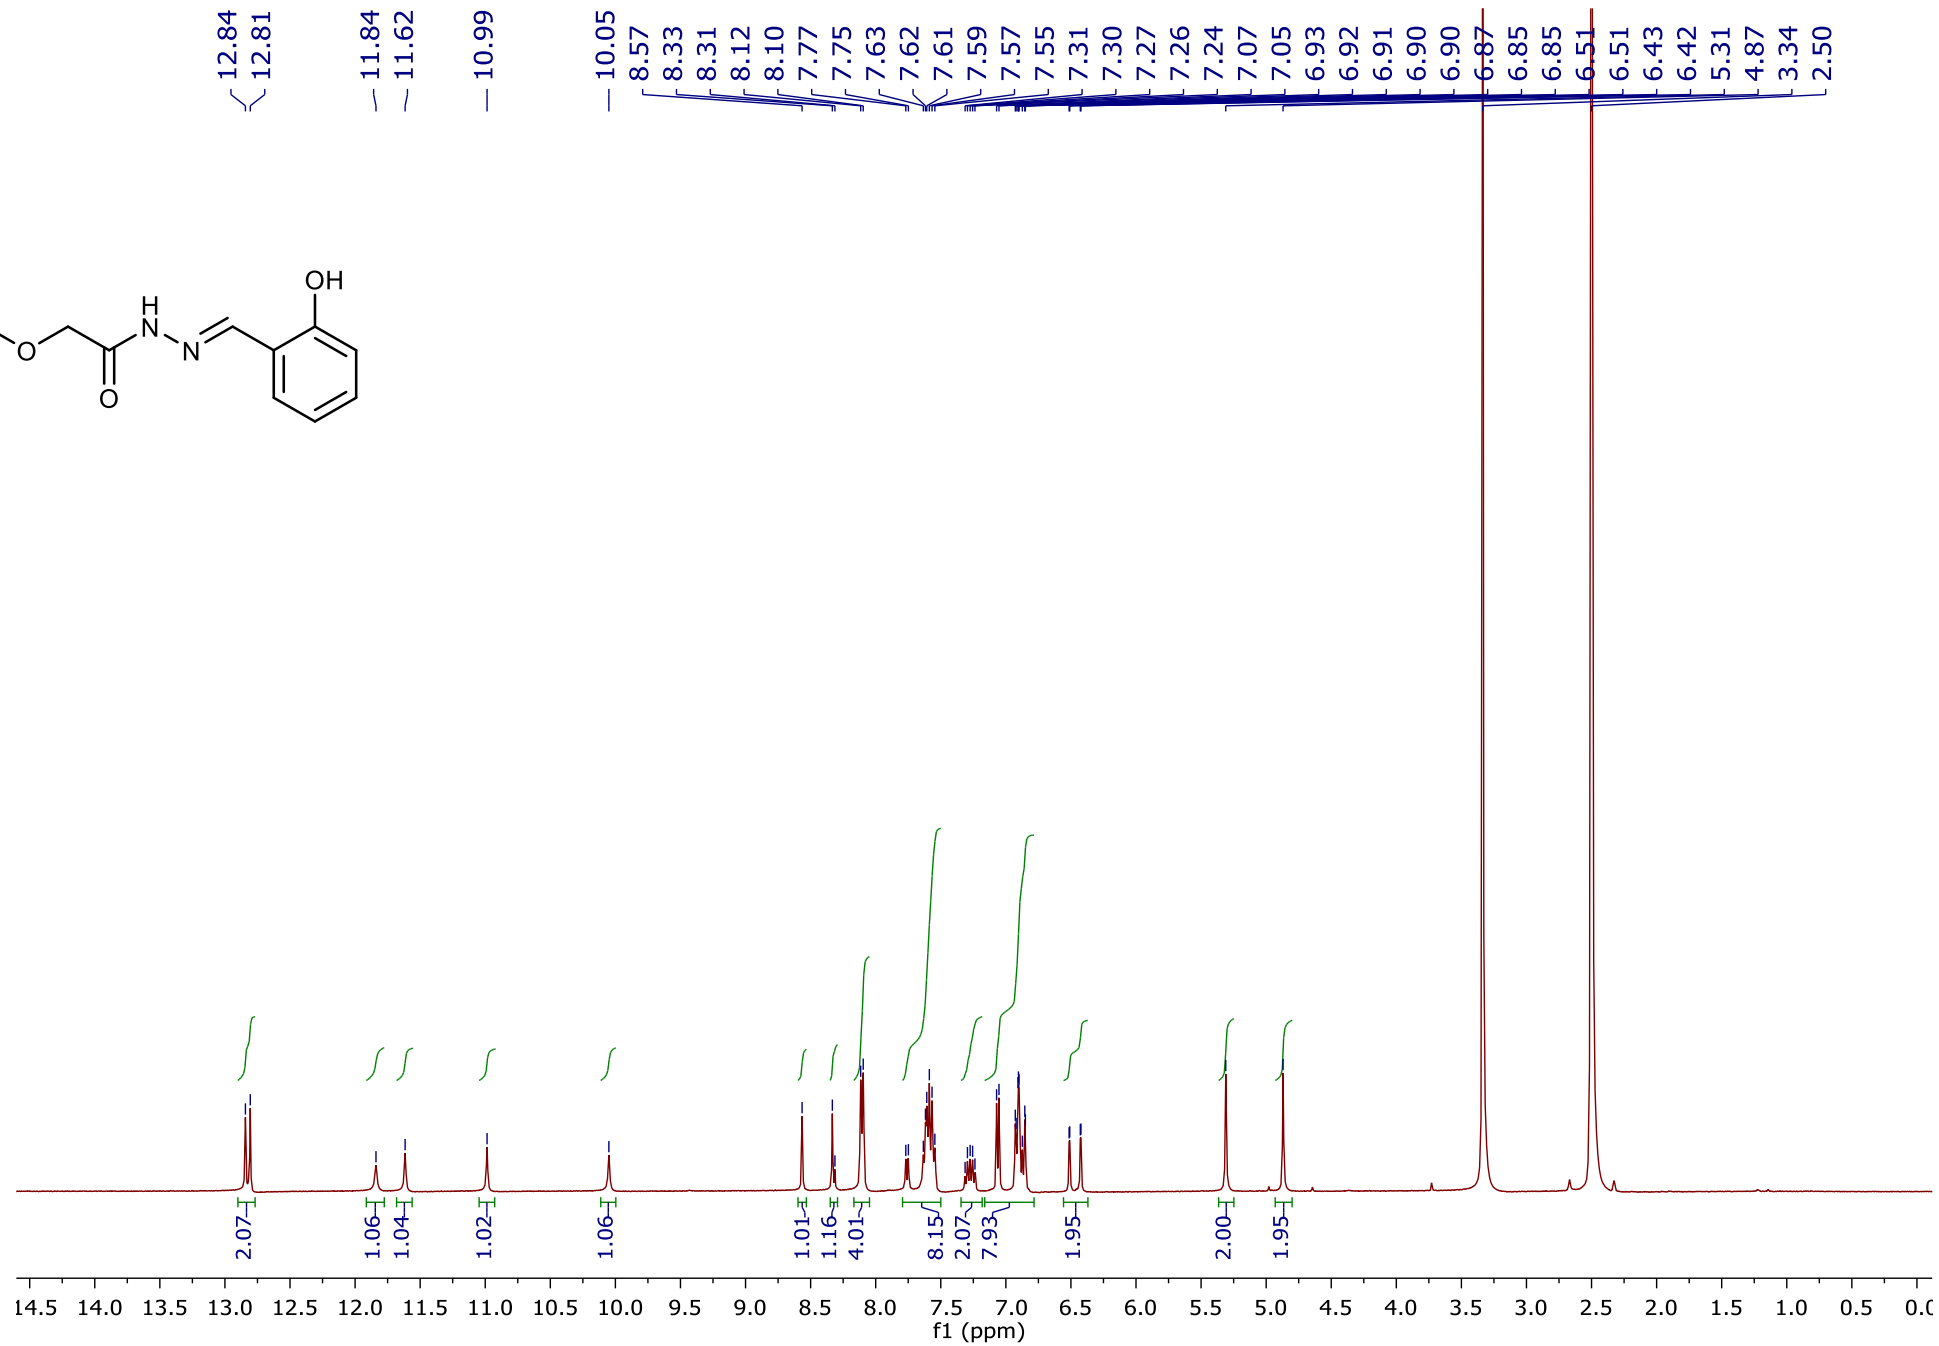

**S3.** <sup>1</sup>H NMR of Compound **4a**

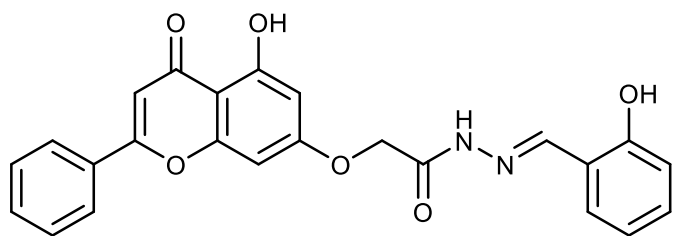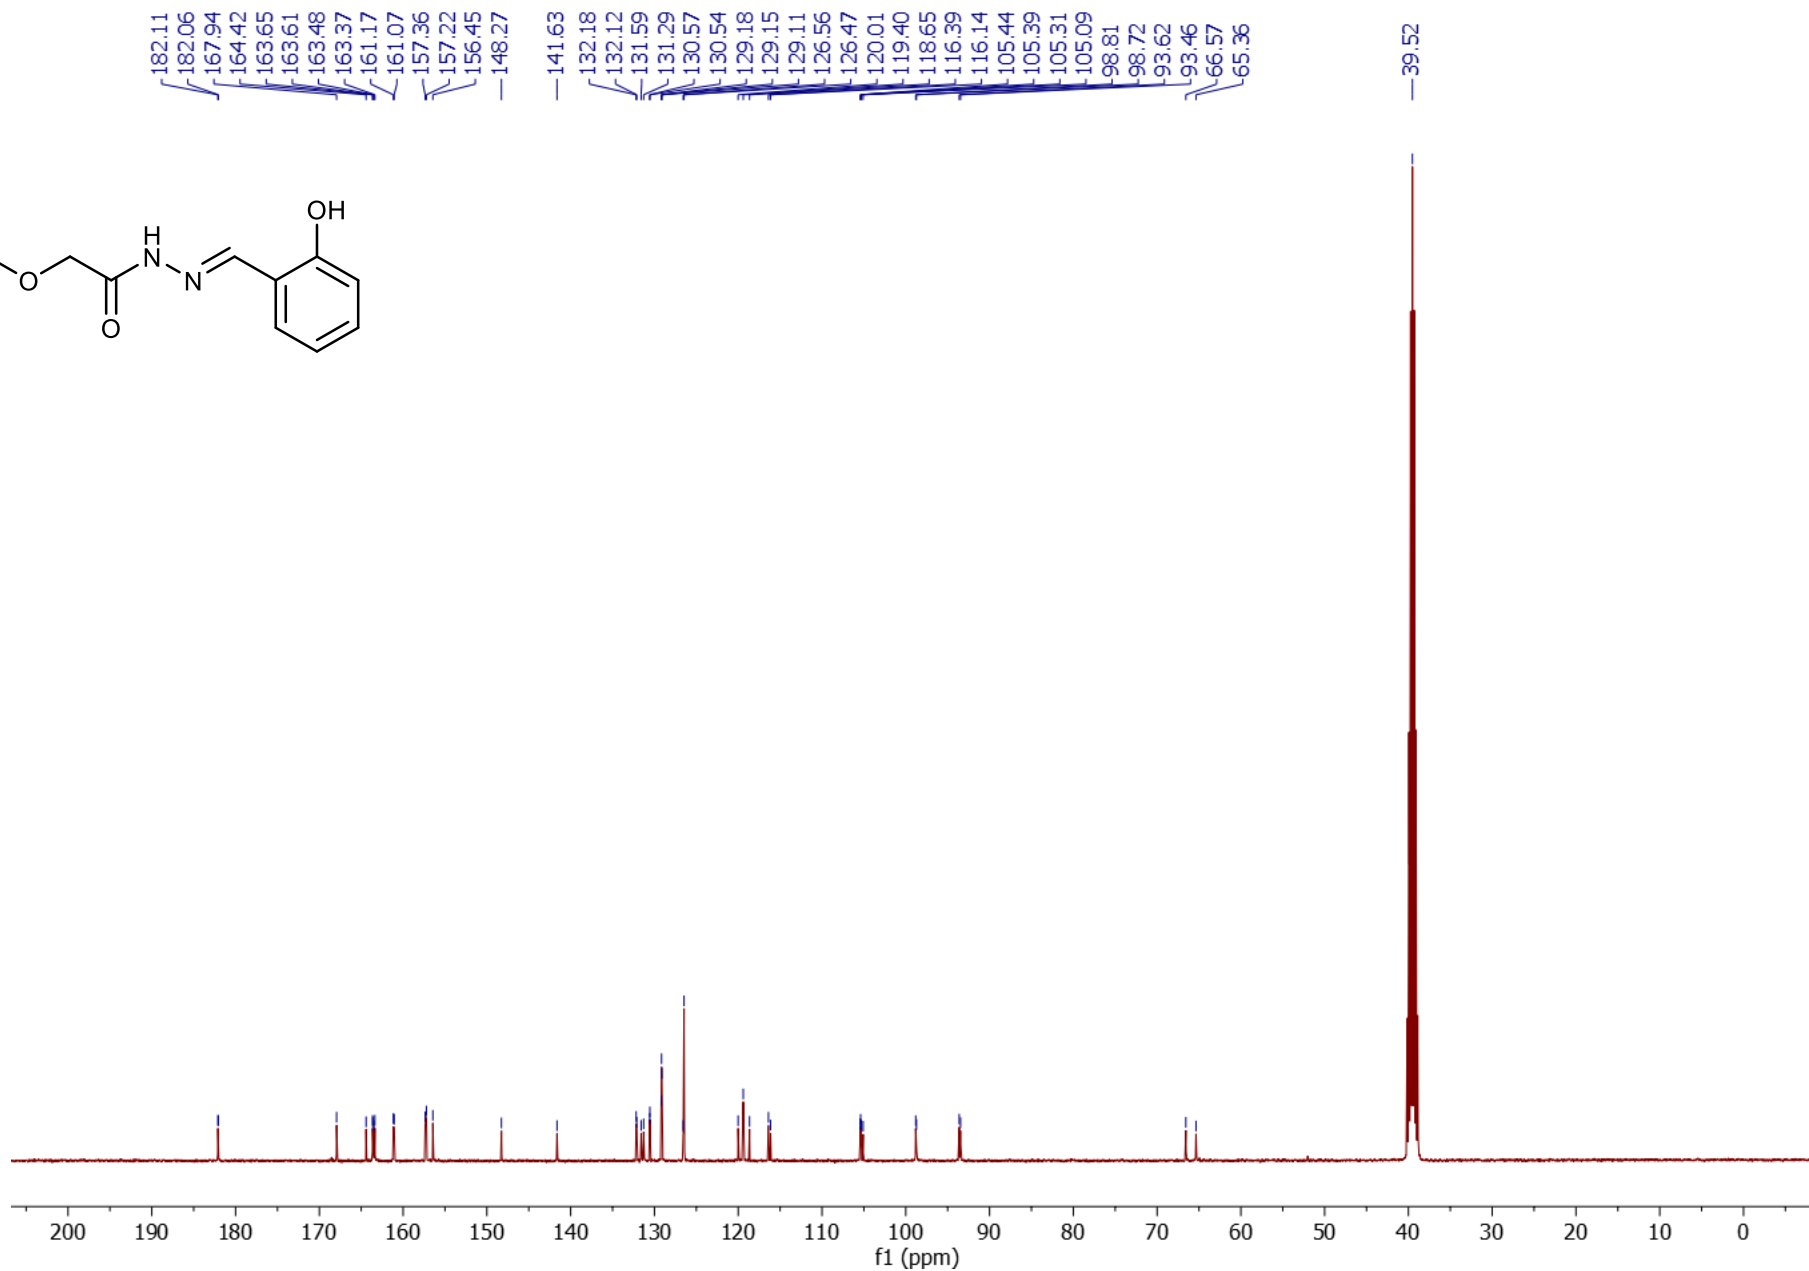

S4.  $^{13}\text{C}$  NMR of Compound 4a

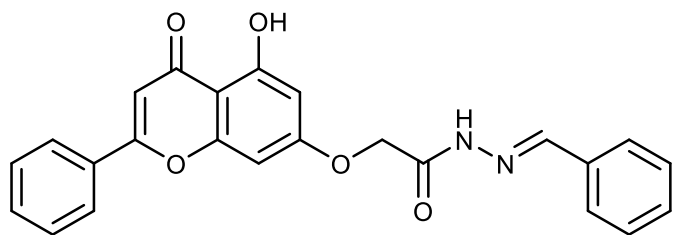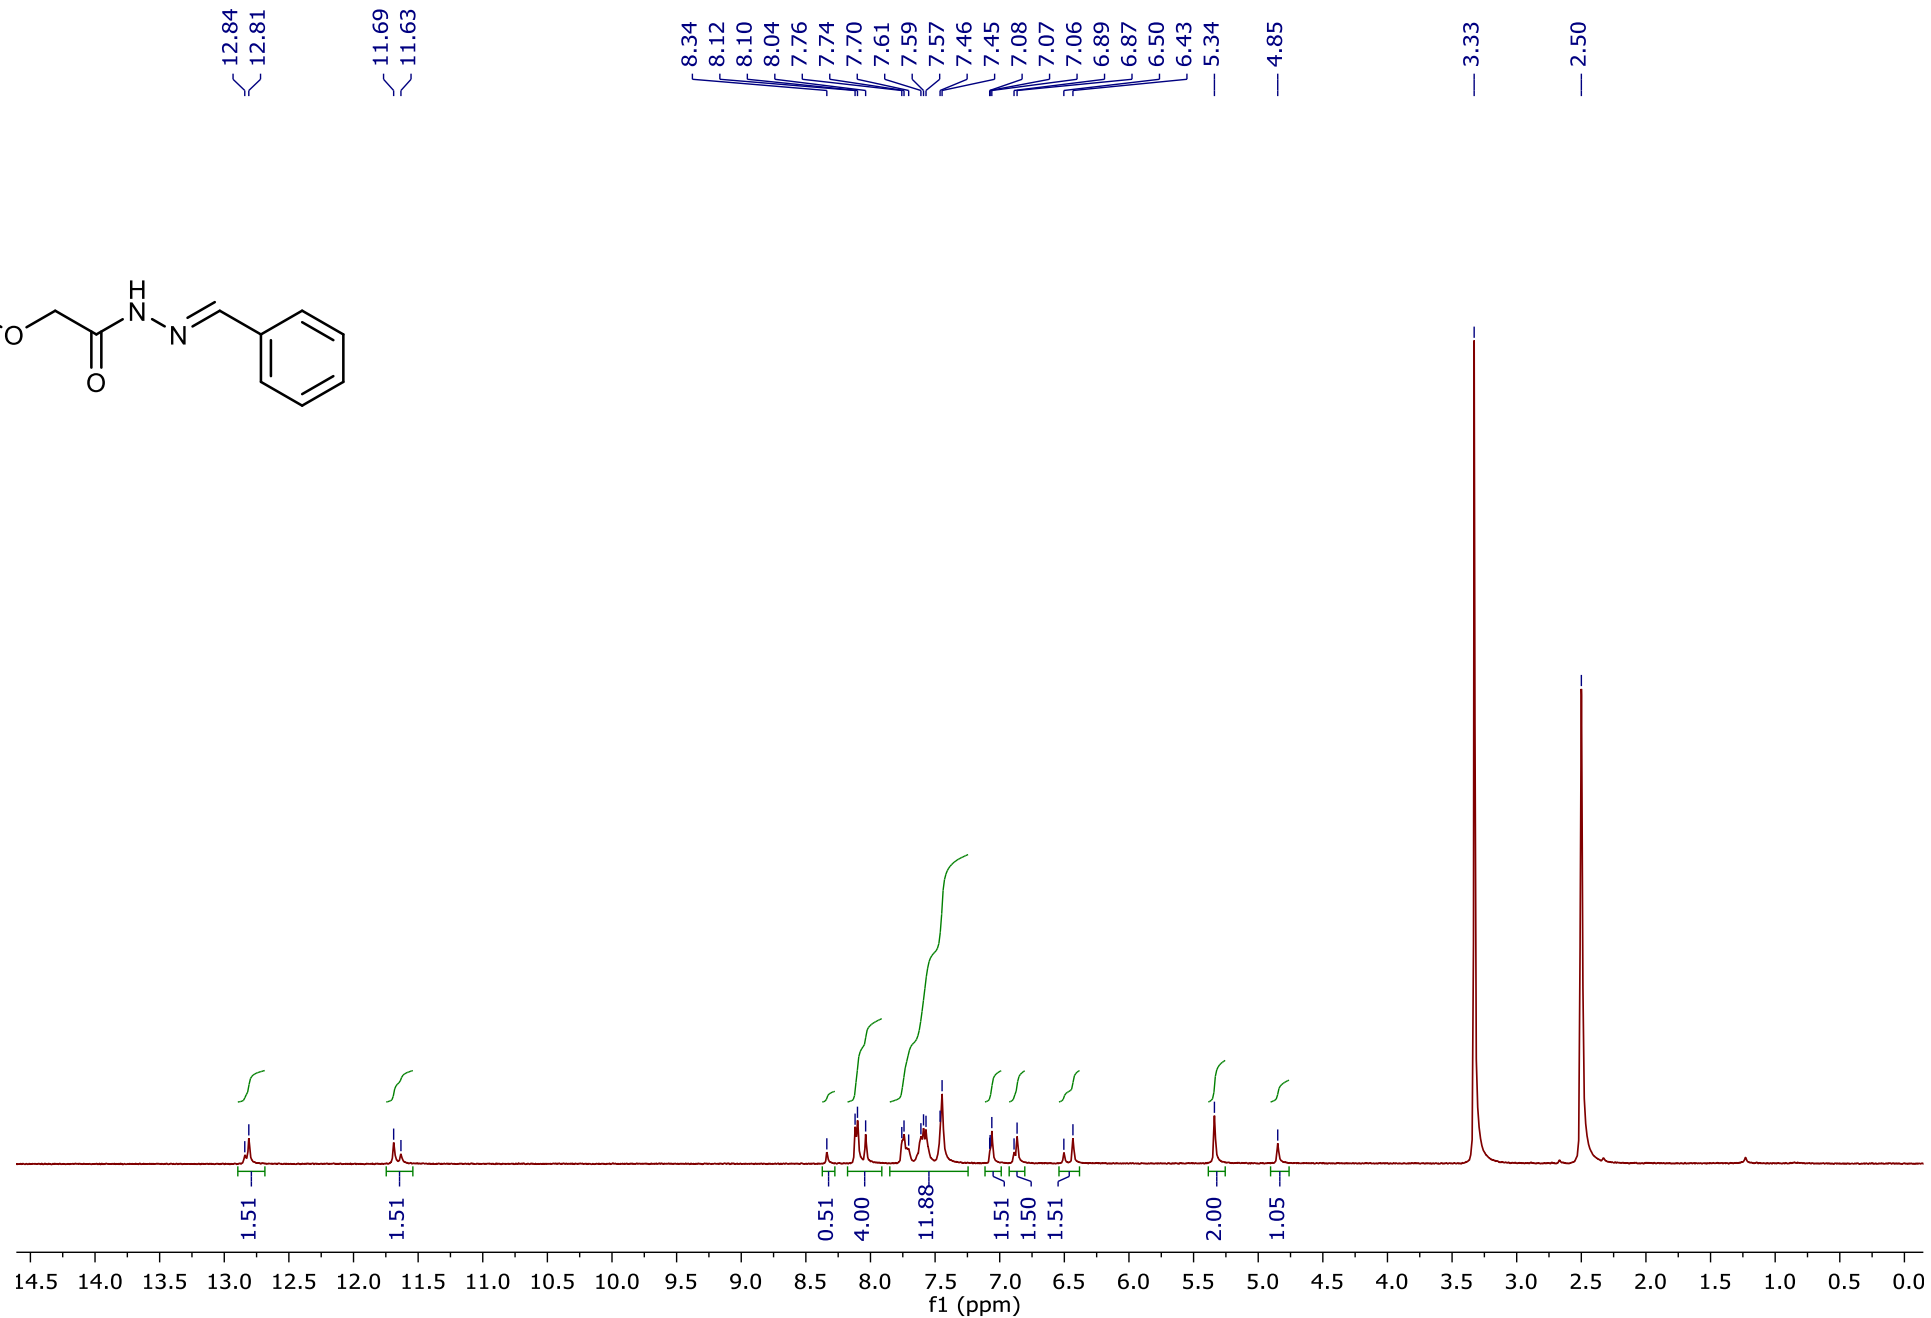

**S5.**  $^1\text{H}$  NMR of Compound **4b**

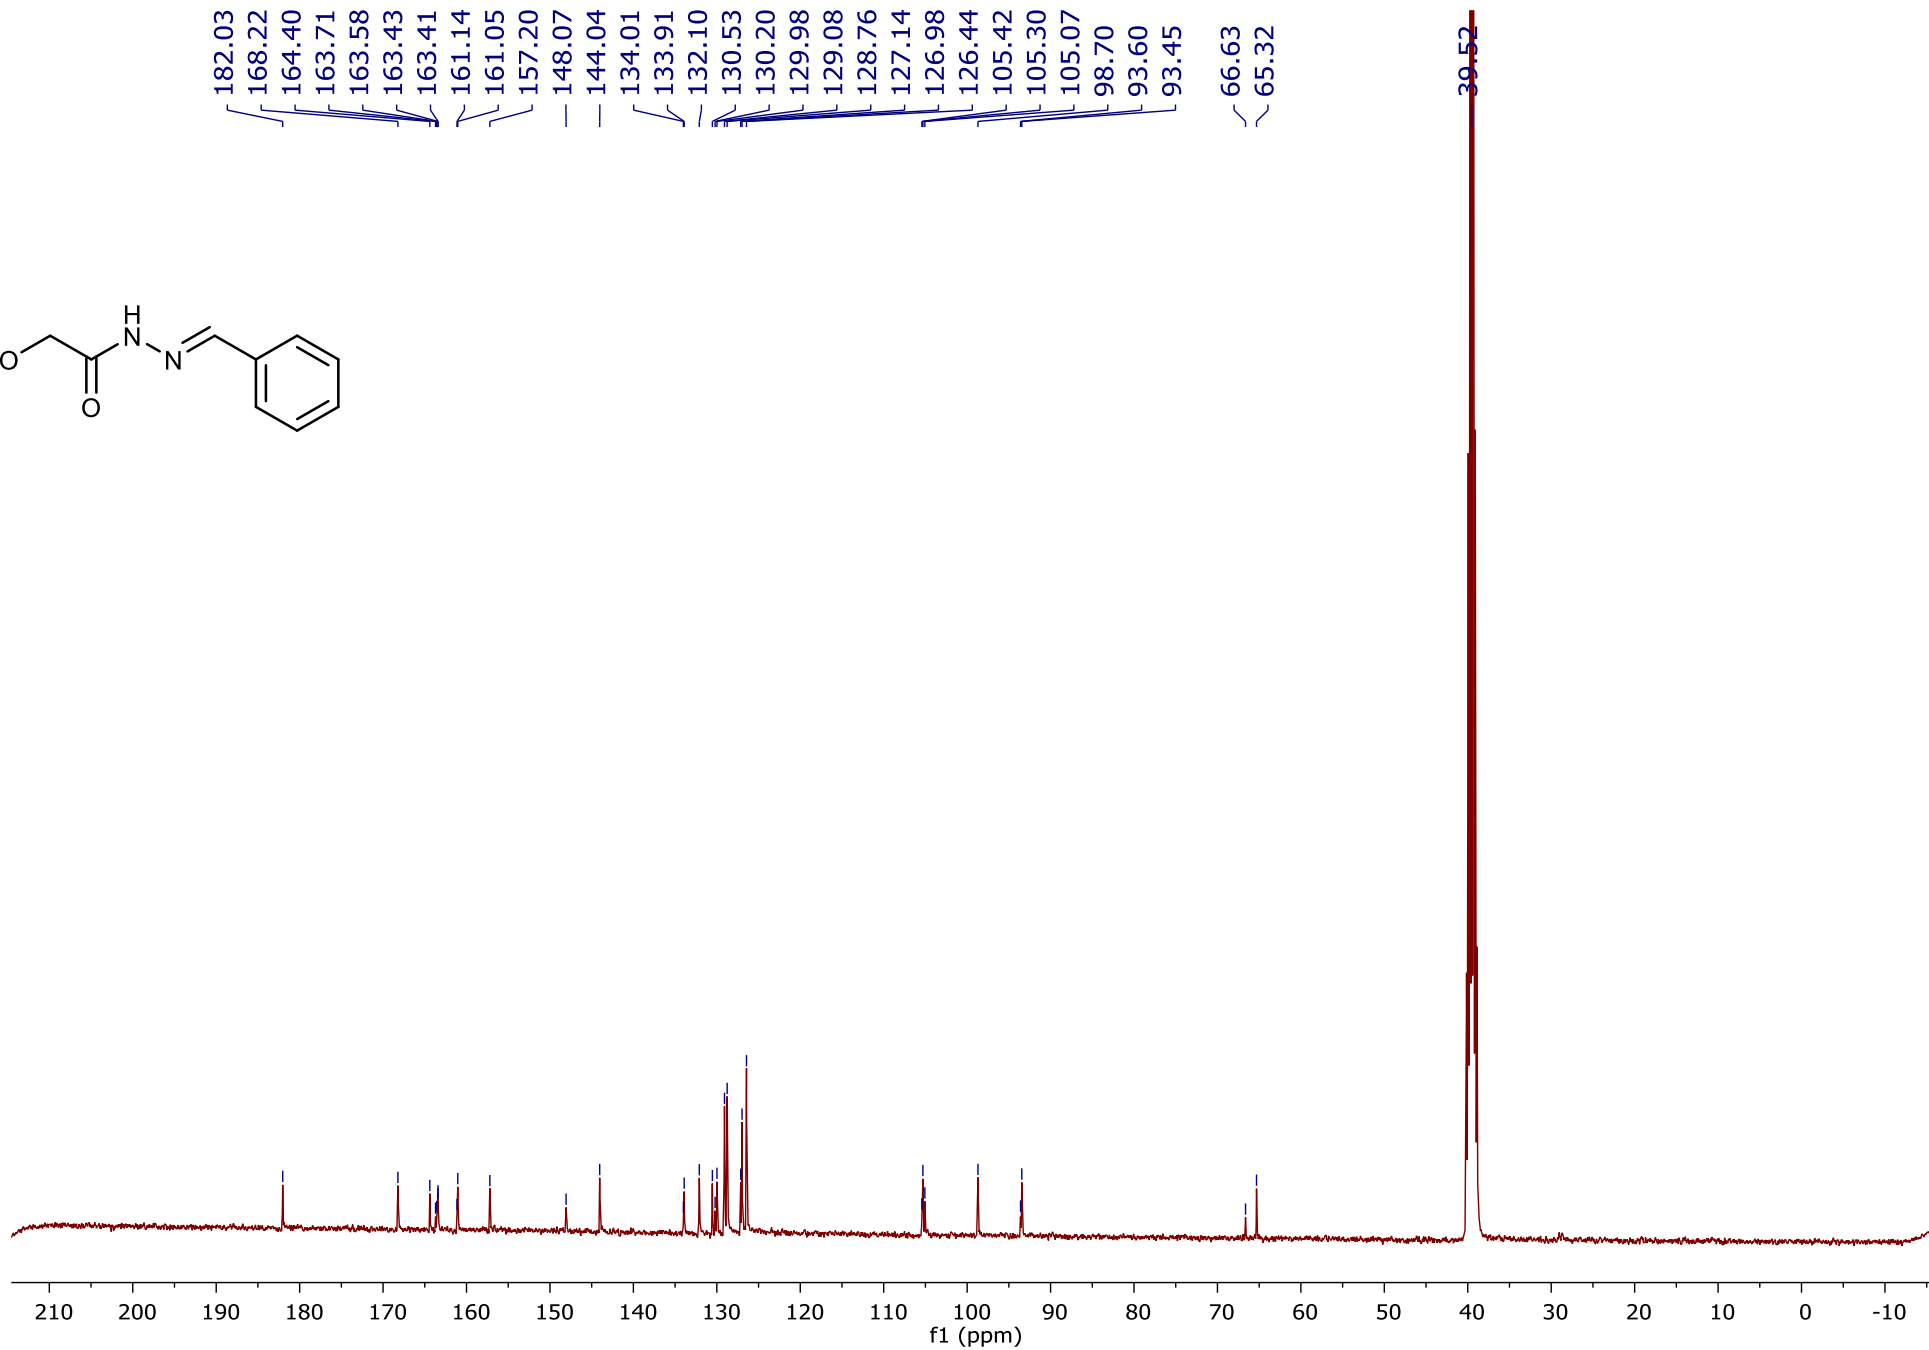

**S6.** <sup>13</sup>C NMR of Compound **4b**

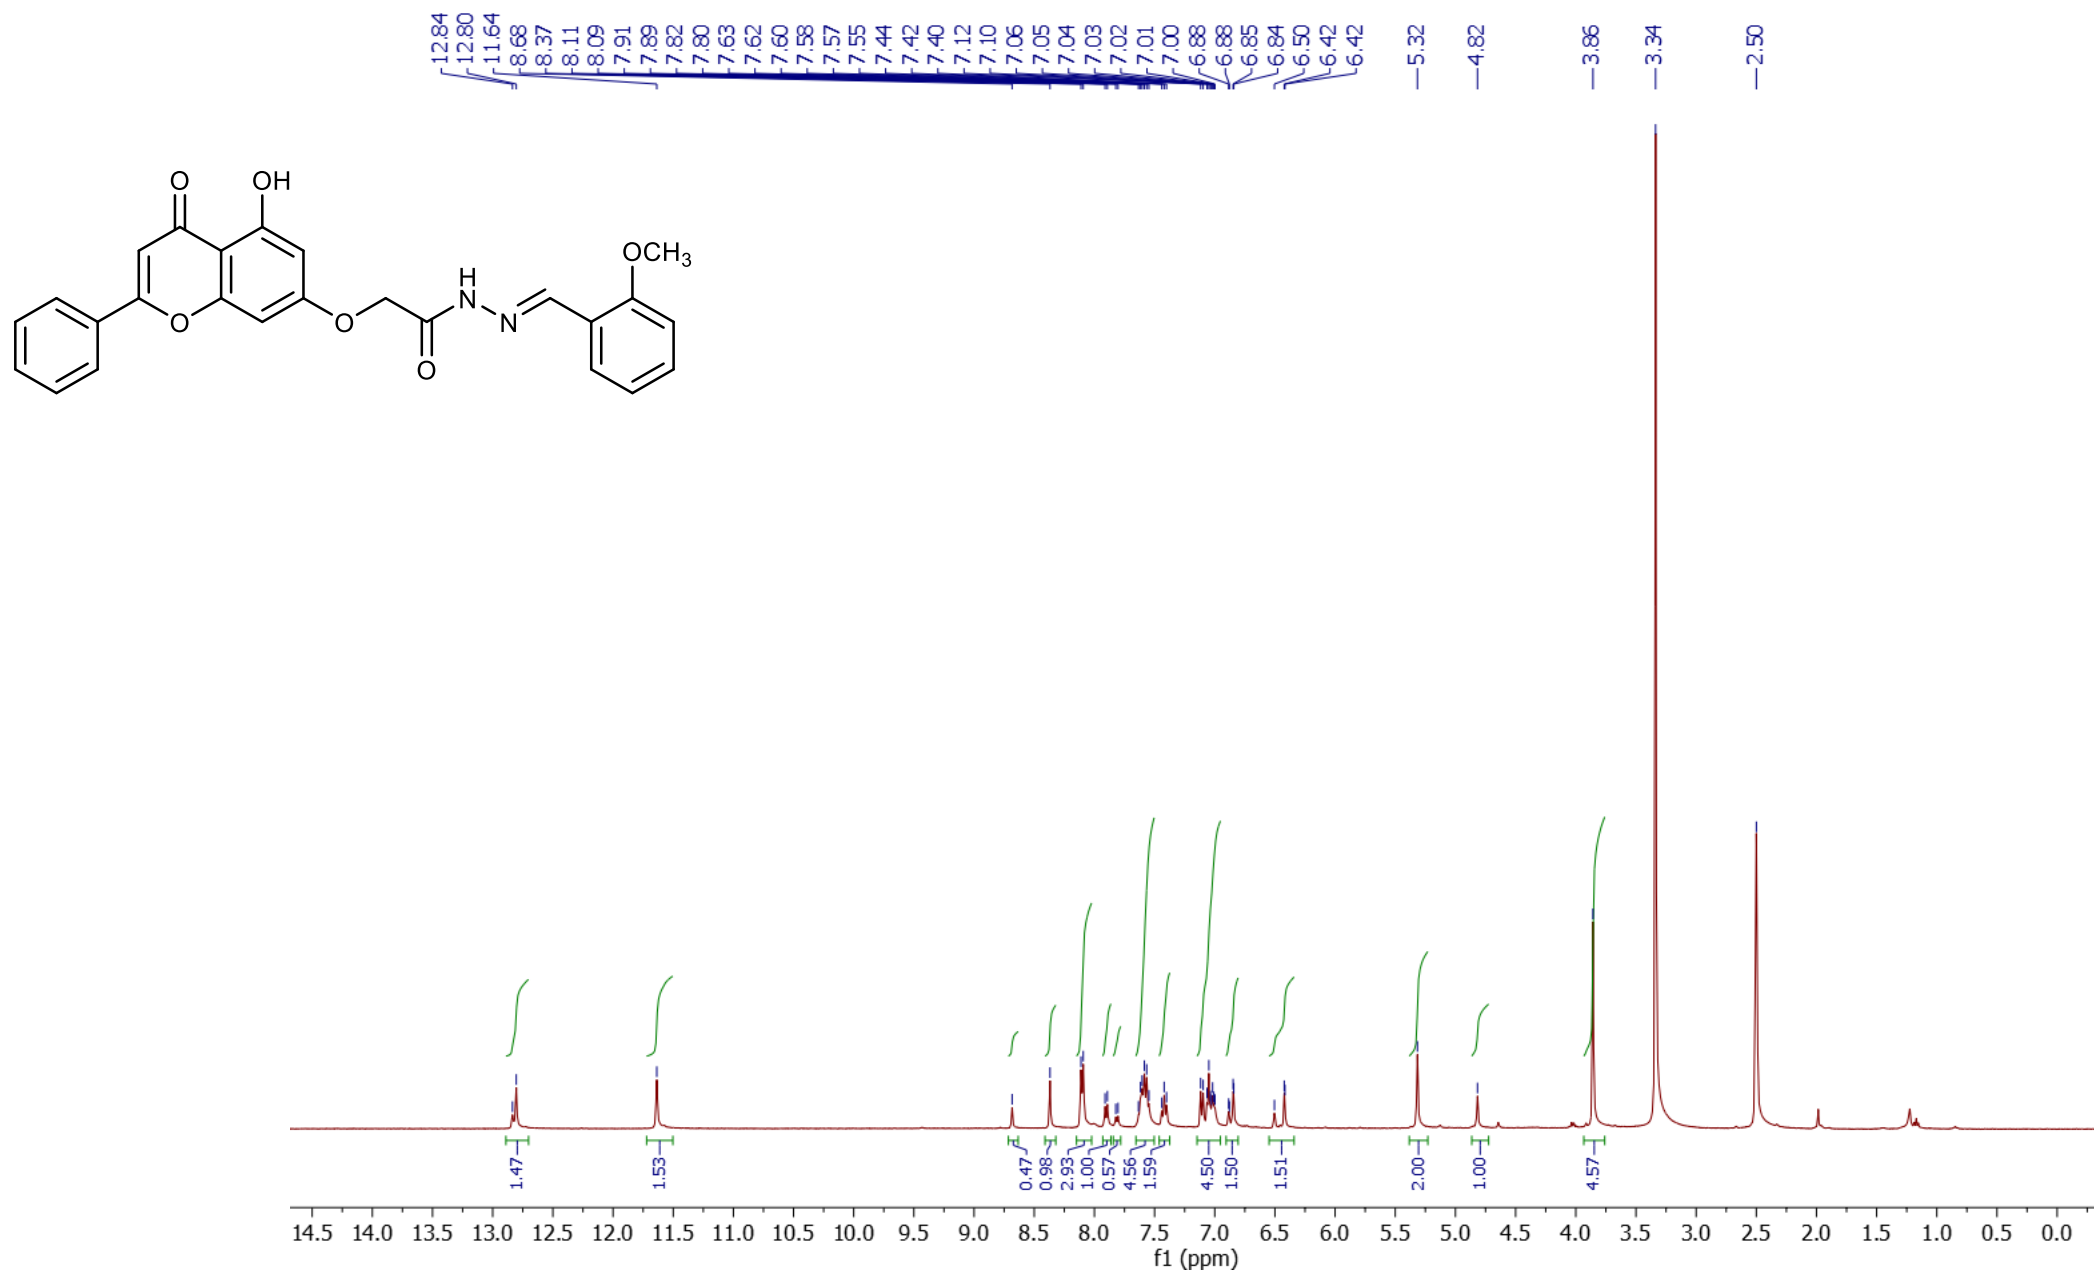

S7. <sup>1</sup>H NMR of Compound 4c

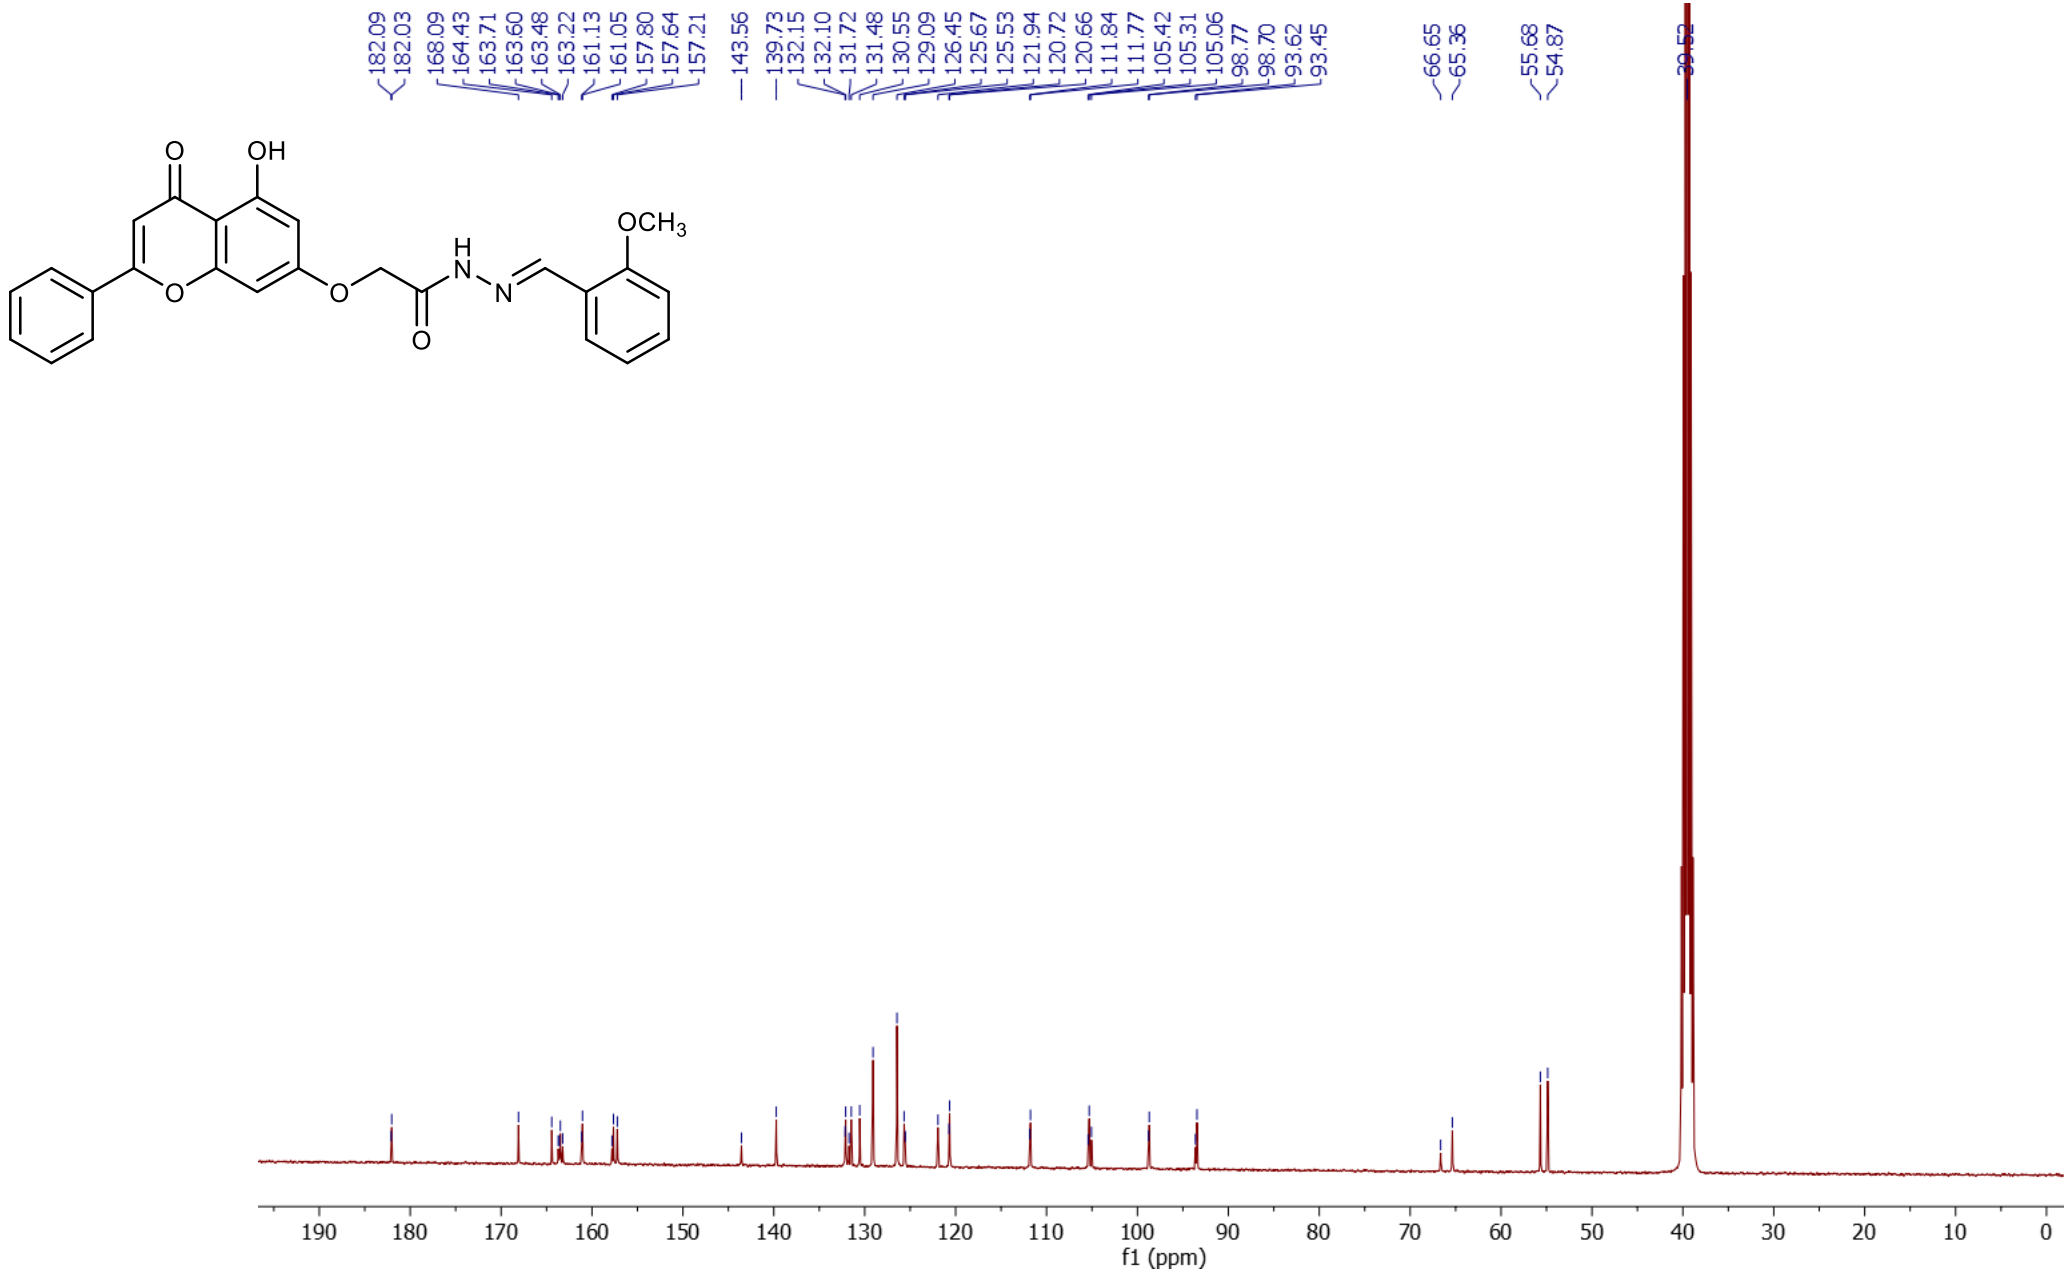

S8. <sup>13</sup>C NMR of Compound 4c



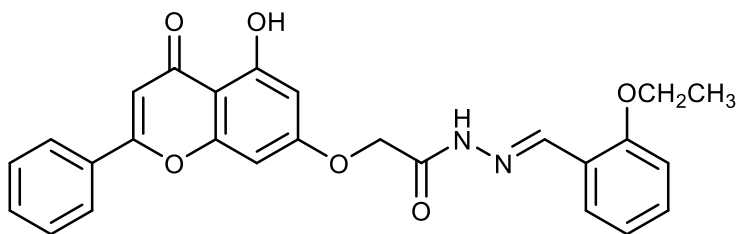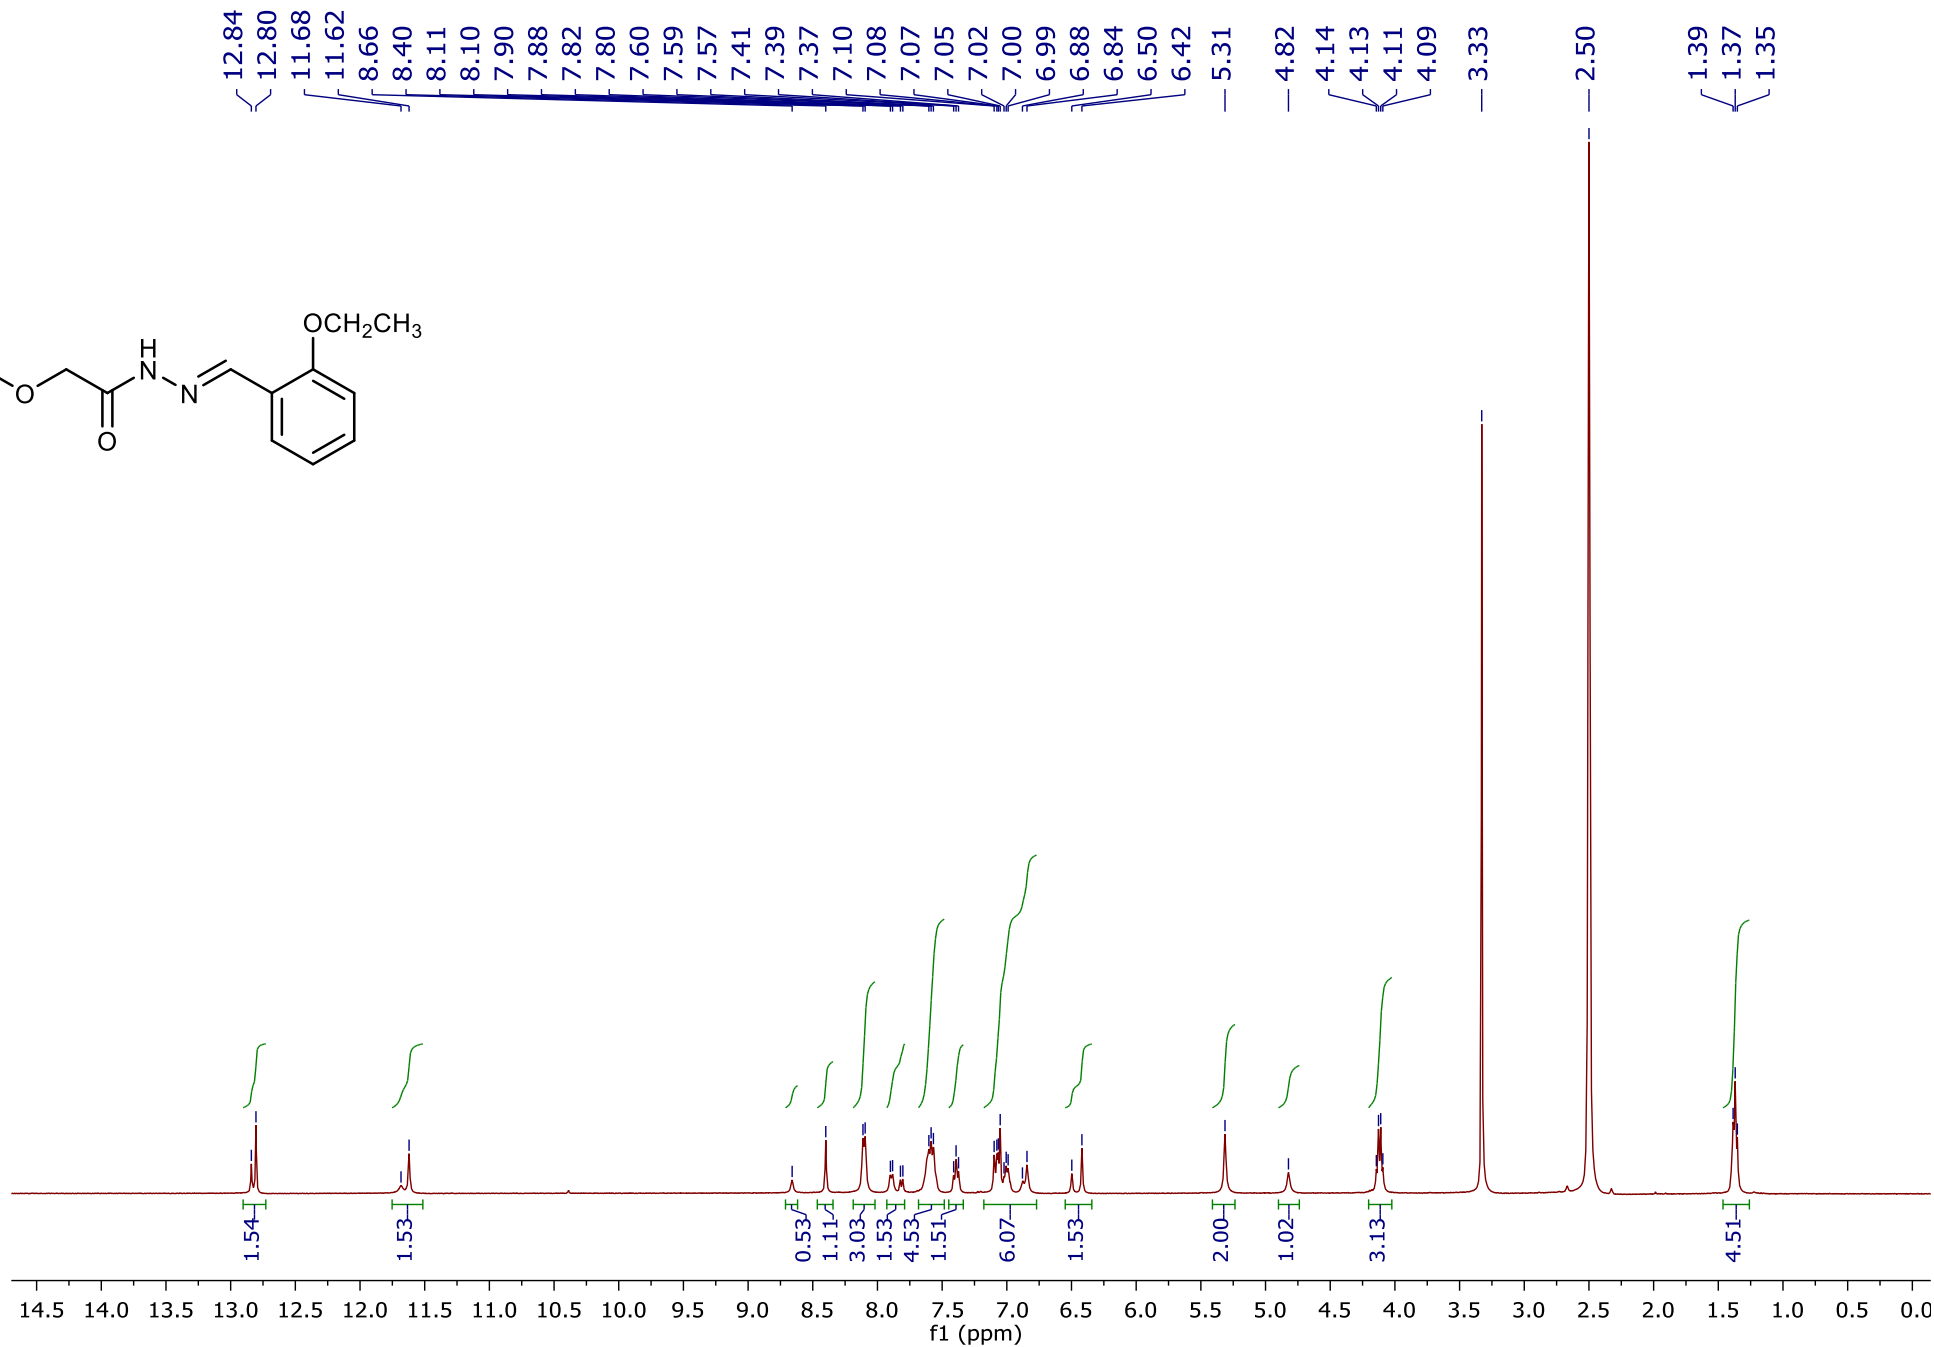

**S9.** <sup>1</sup>H NMR of Compound **4d**

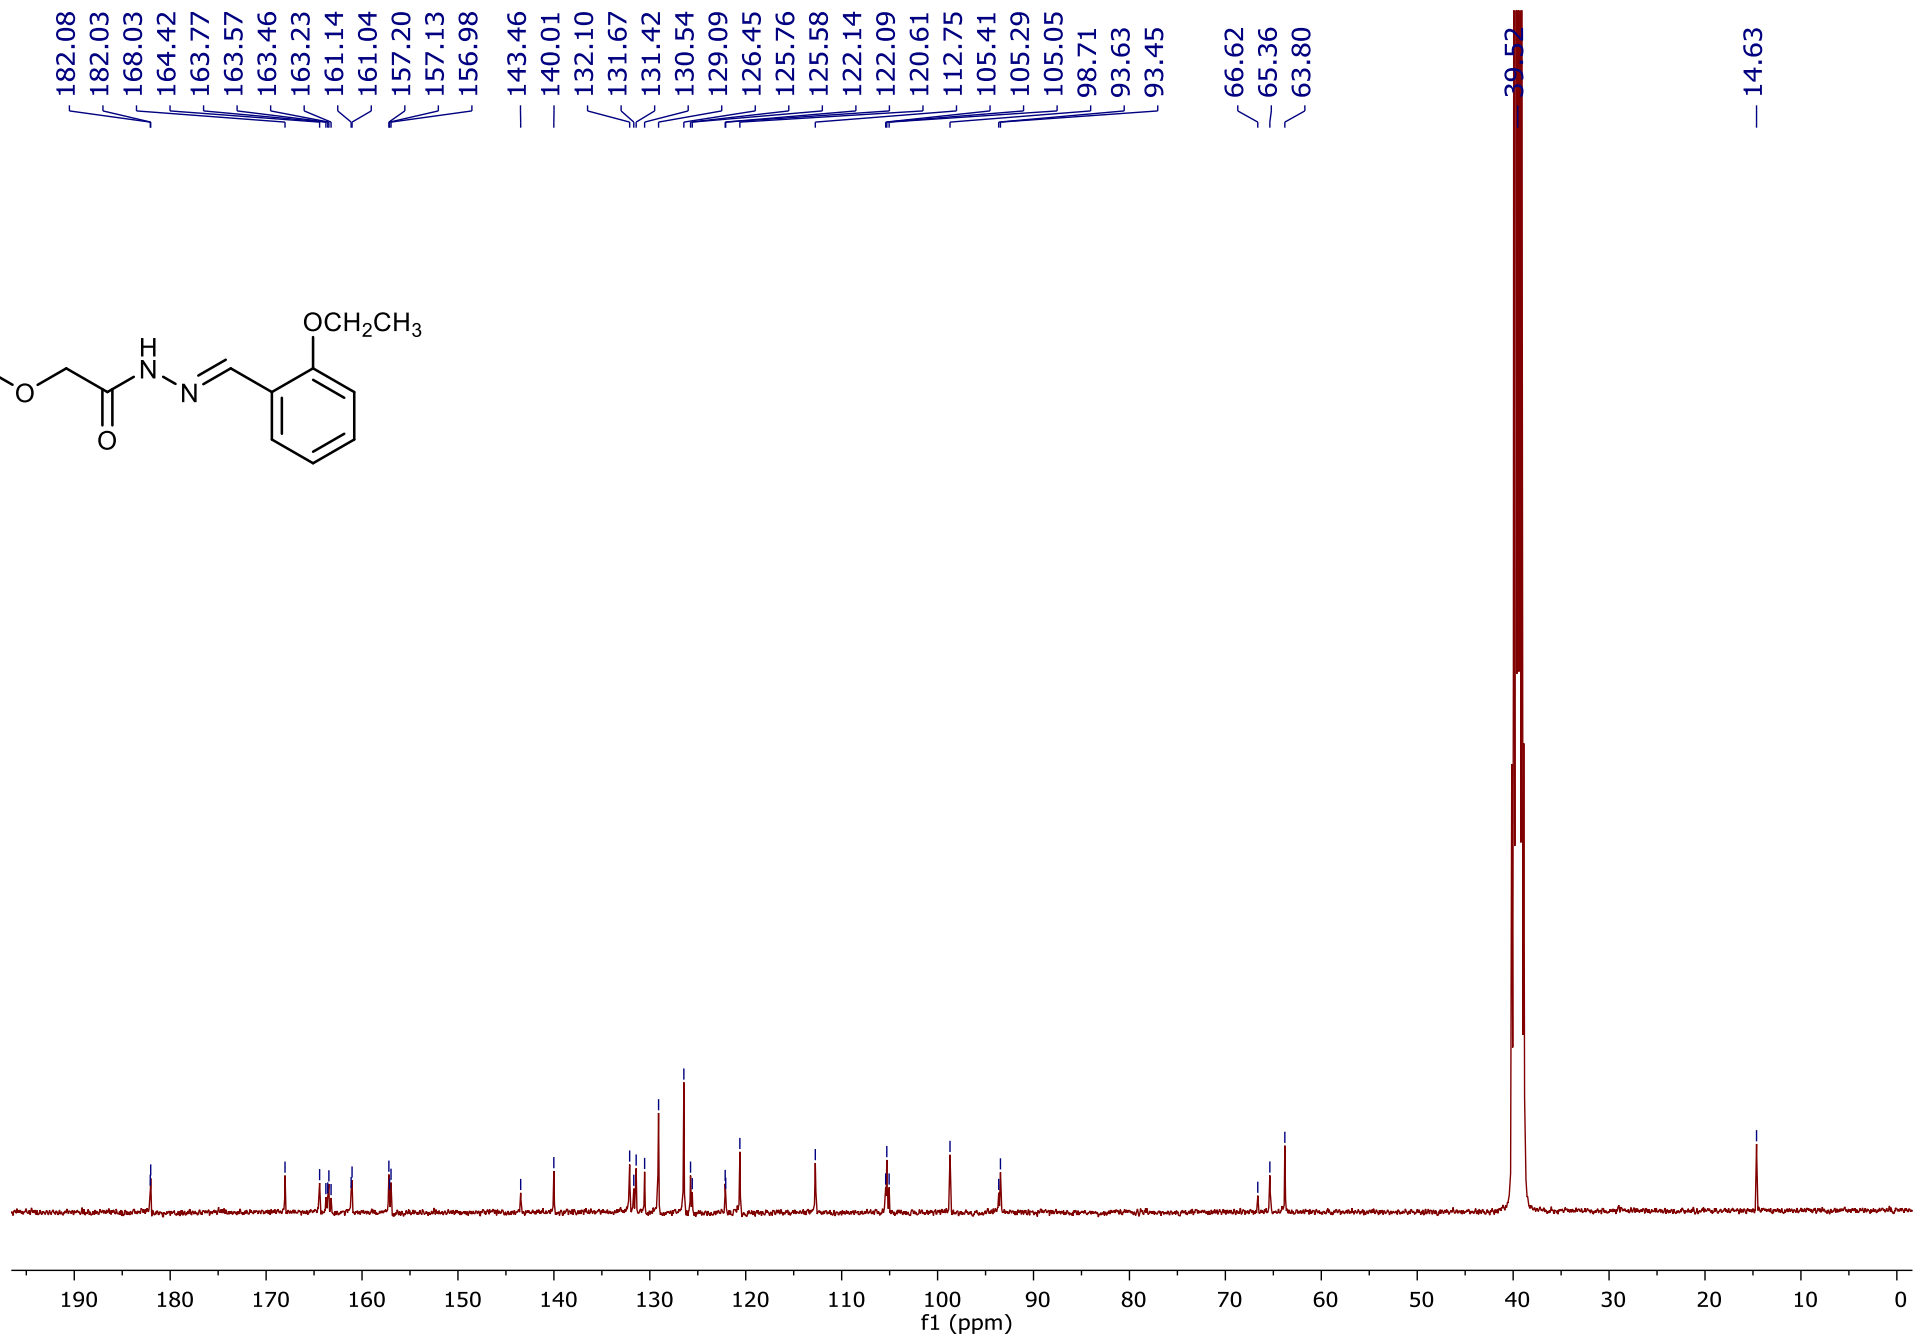

**S10.**  $^{13}\text{C}$  NMR of Compound **4d**

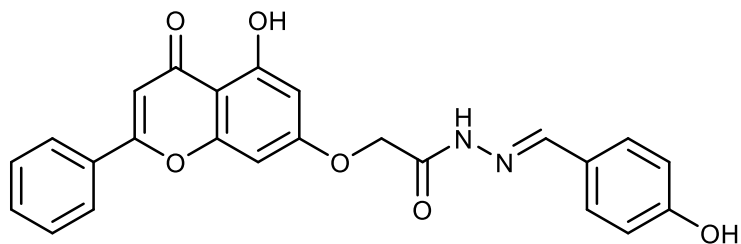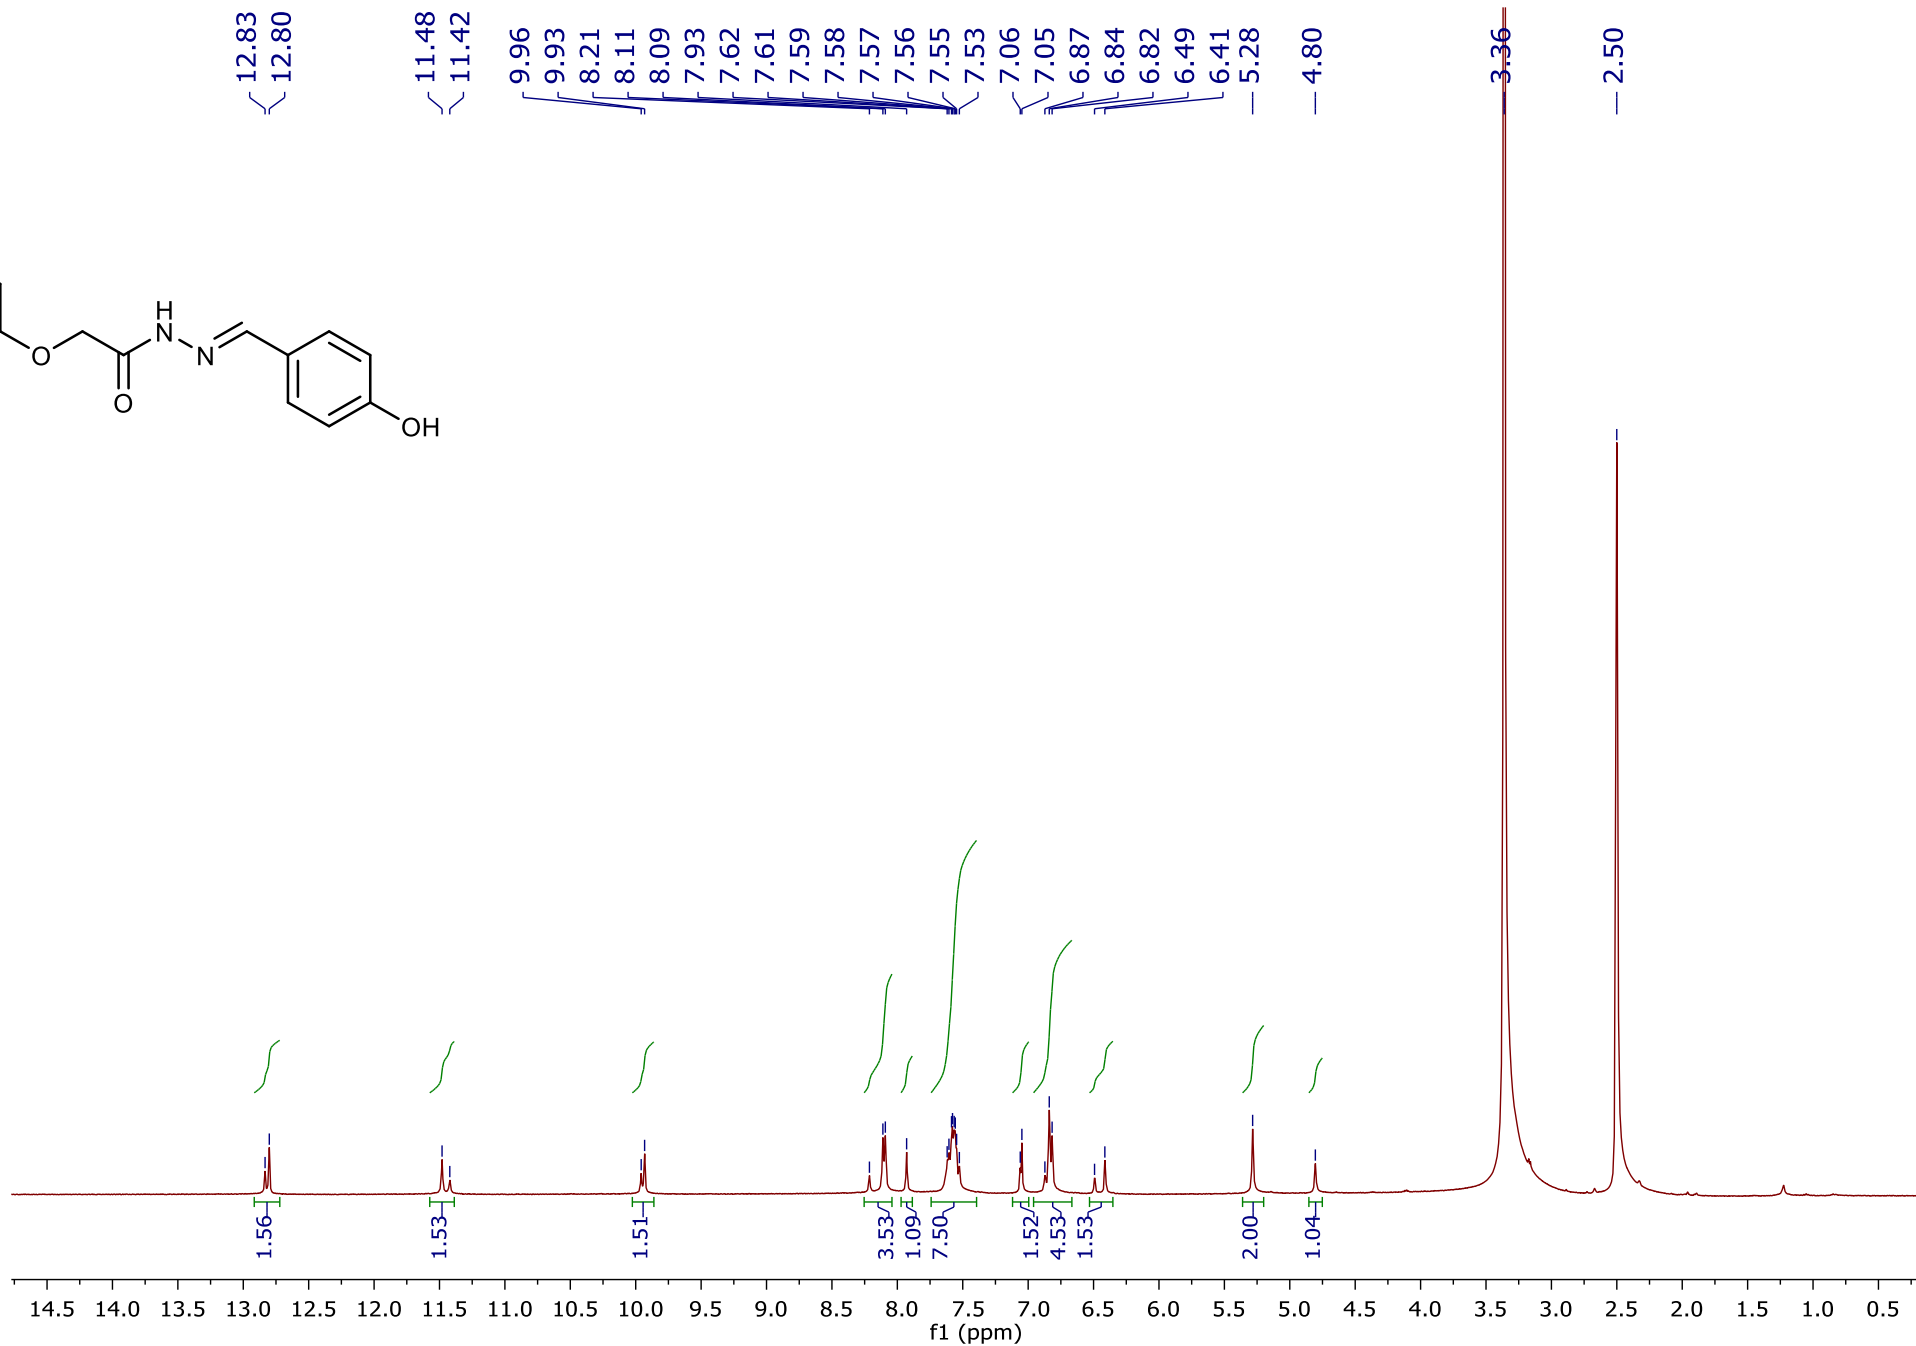

**S11.**  $^1\text{H}$  NMR of Compound **4e**

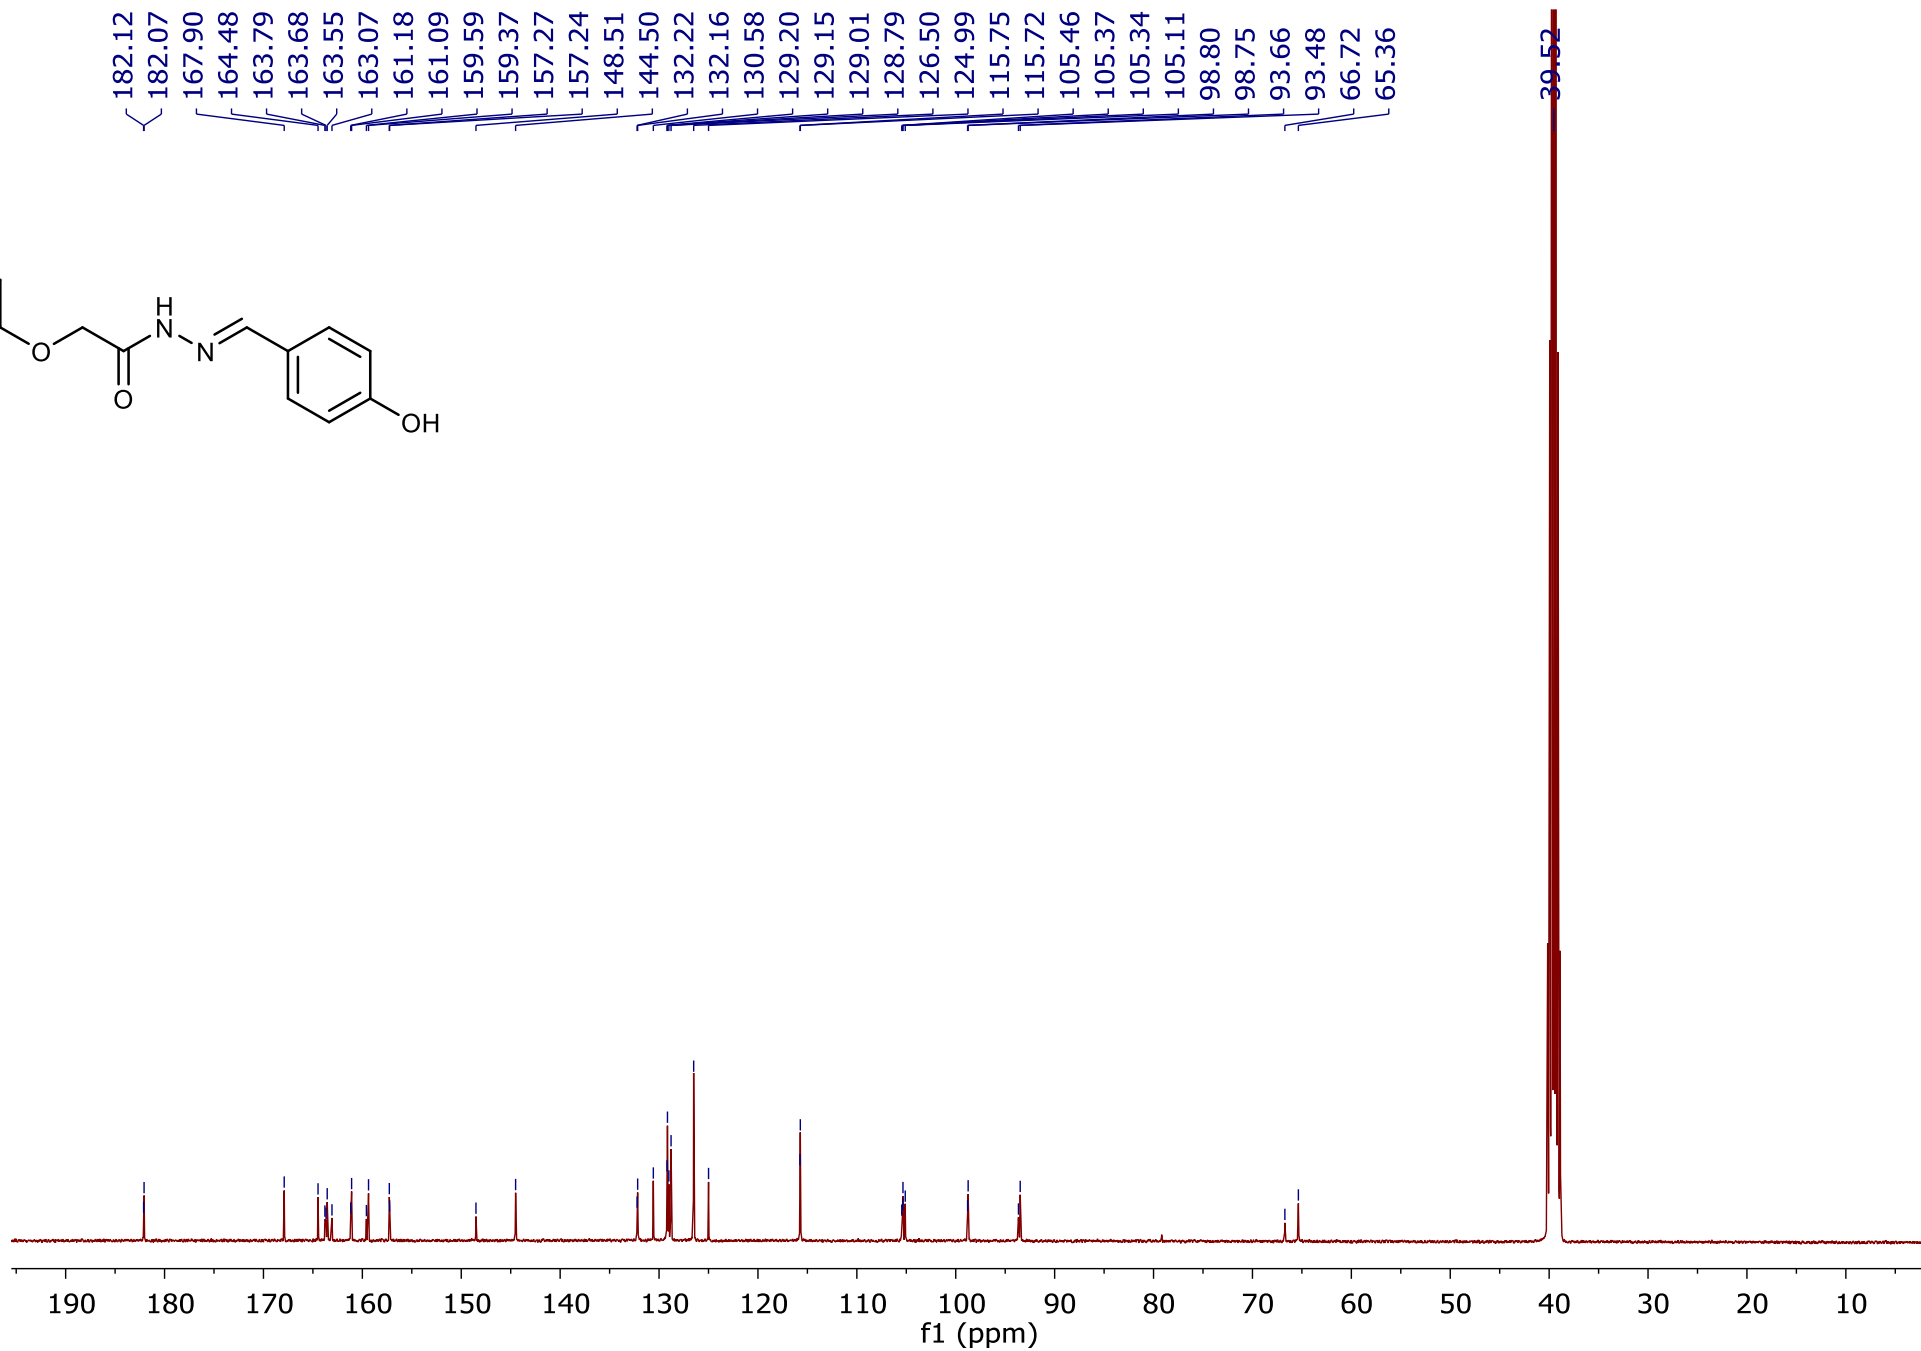

**S12.**  $^{13}\text{C}$  NMR of Compound **4e**

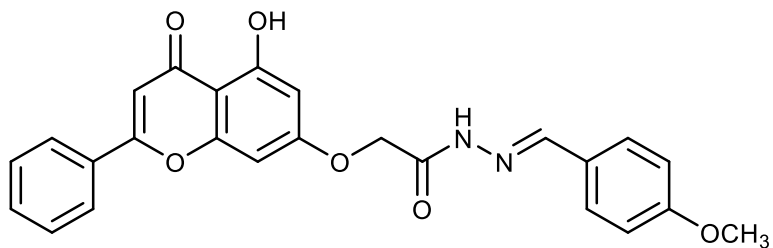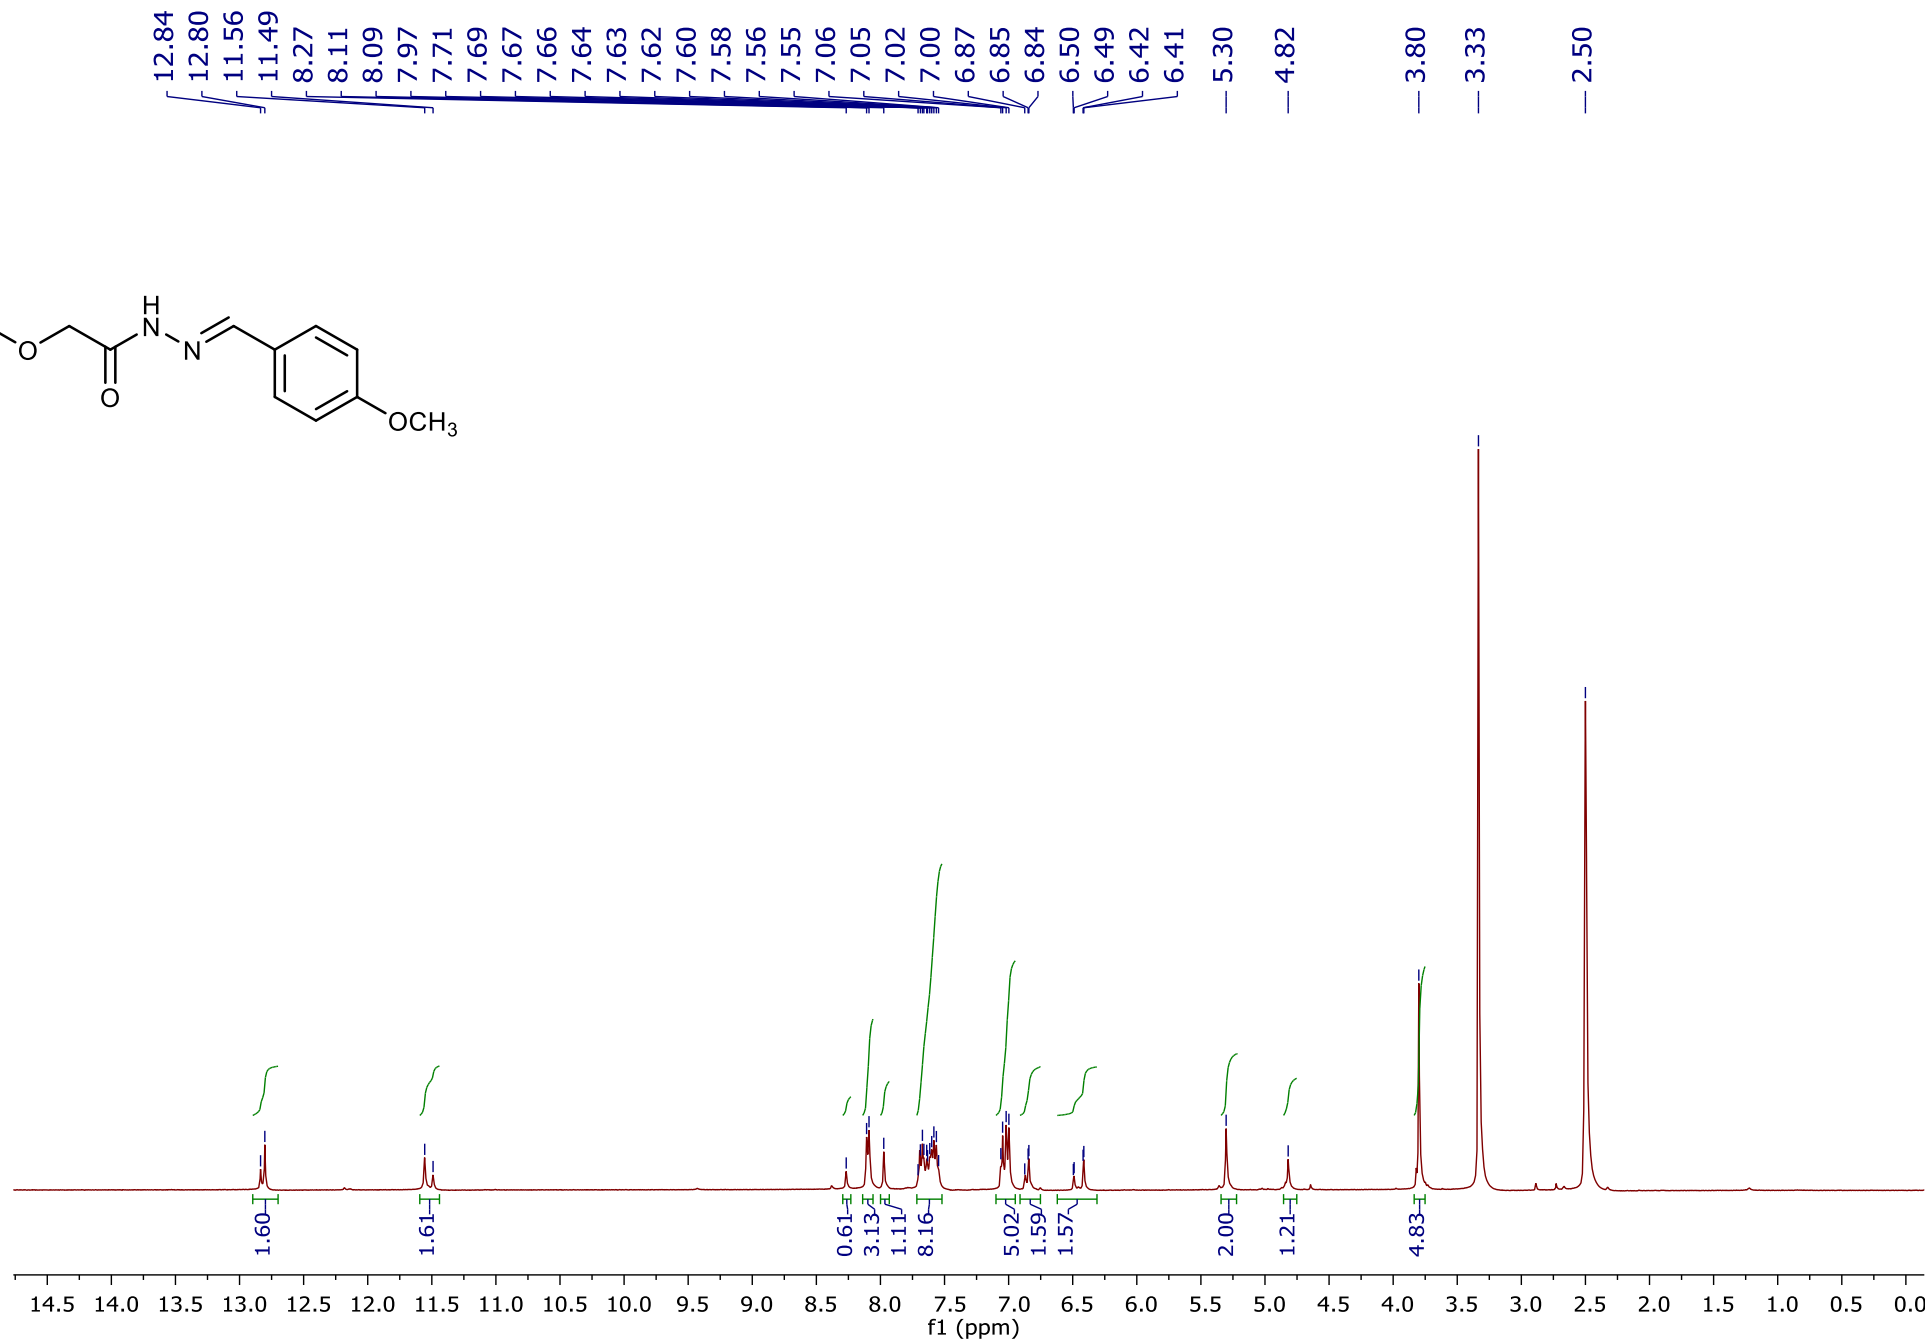

**S13.**  $^1\text{H}$  NMR of Compound **4f**

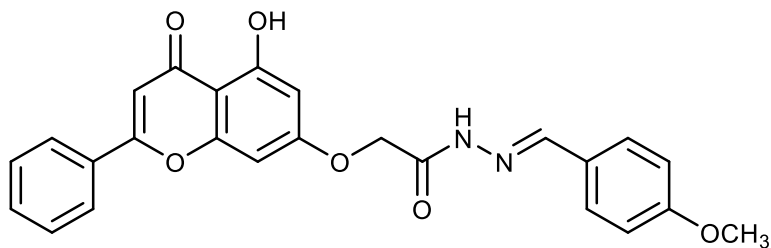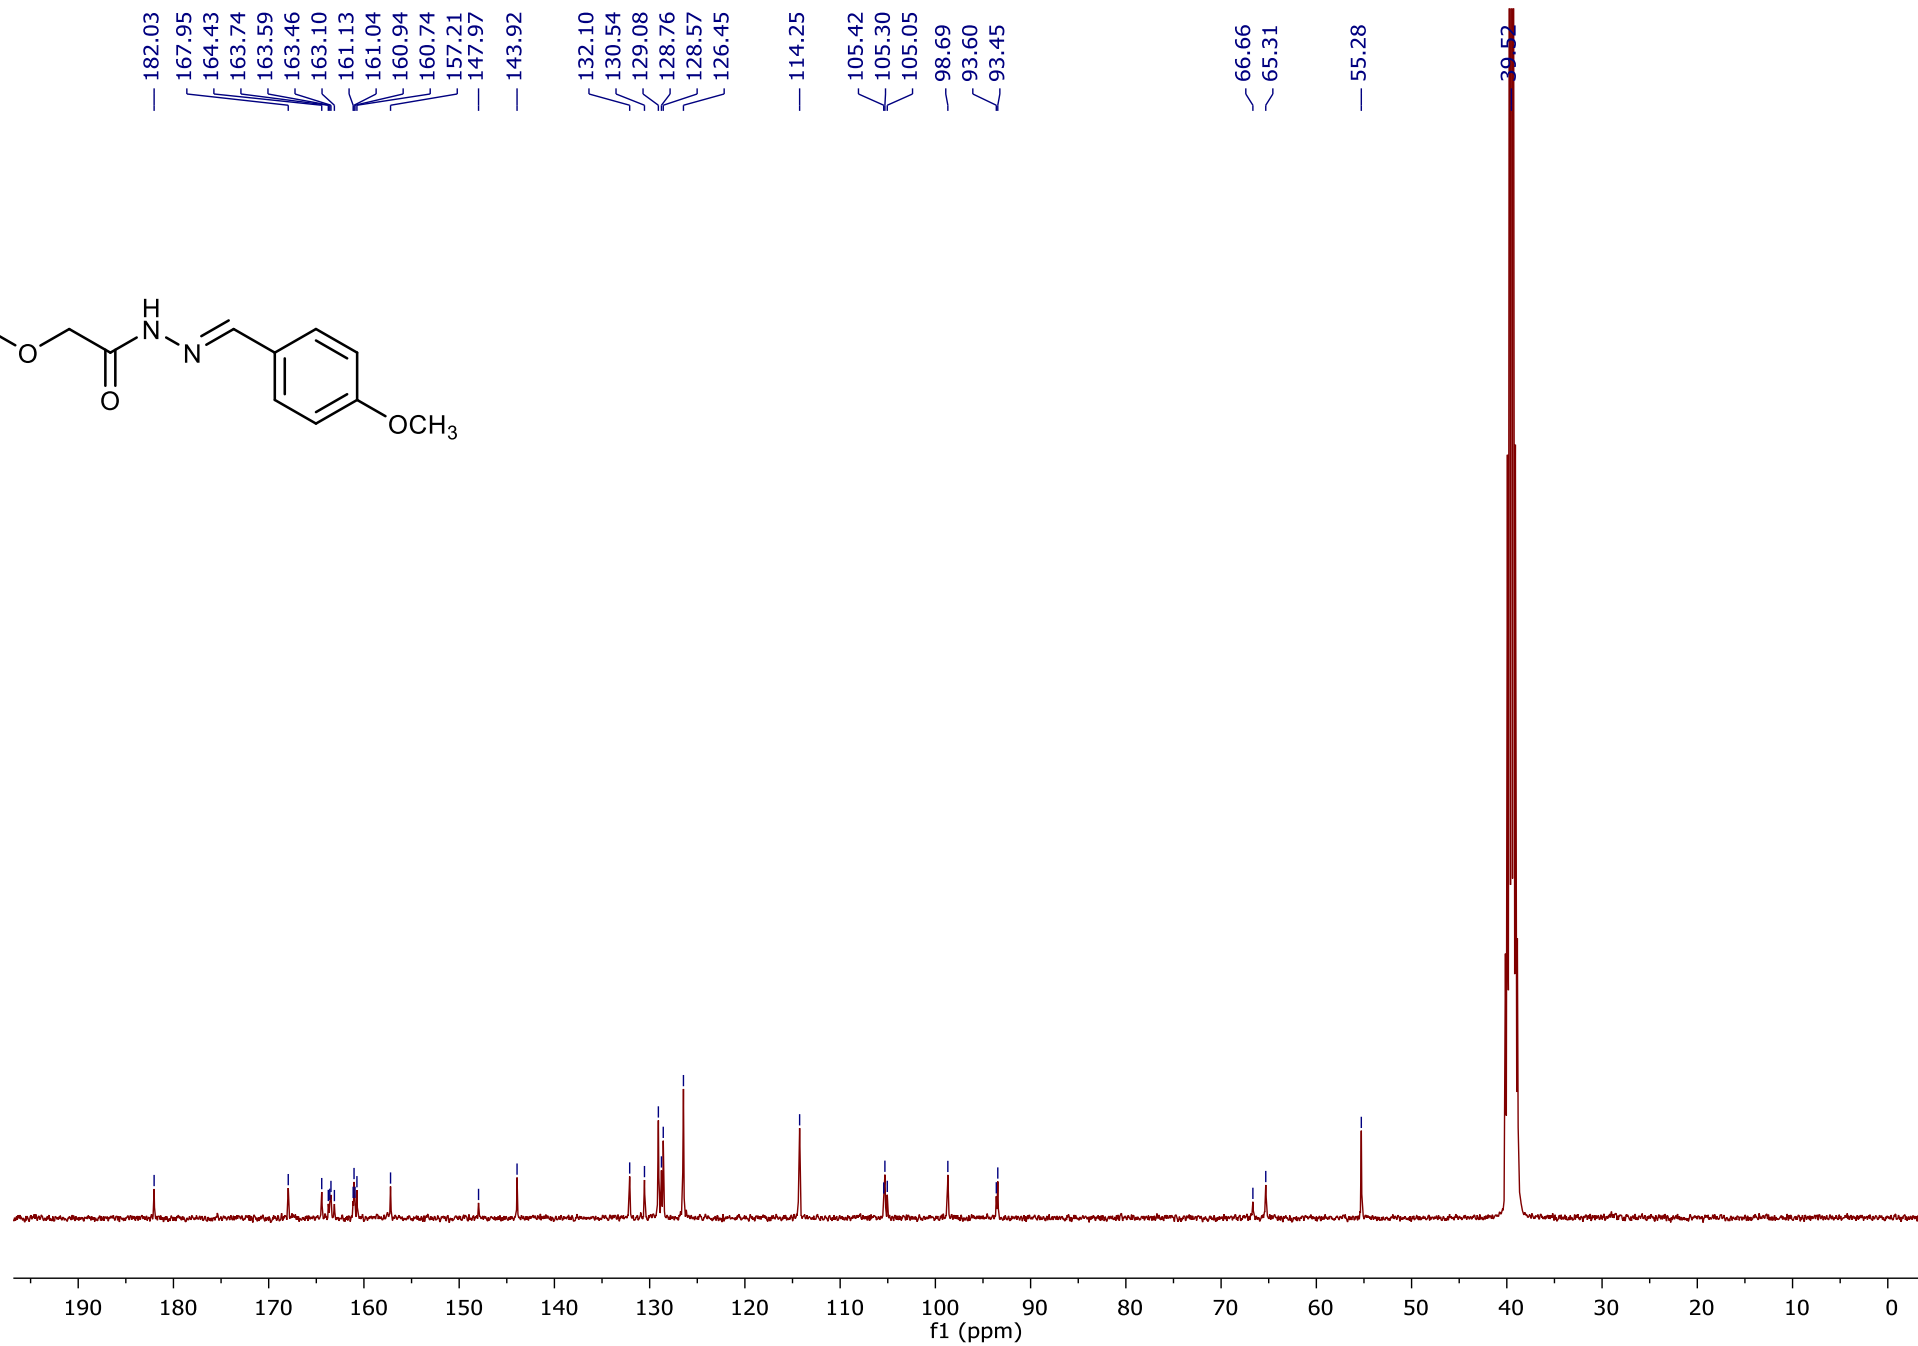

**S14.**  $^{13}\text{C}$  NMR of Compound **4f**

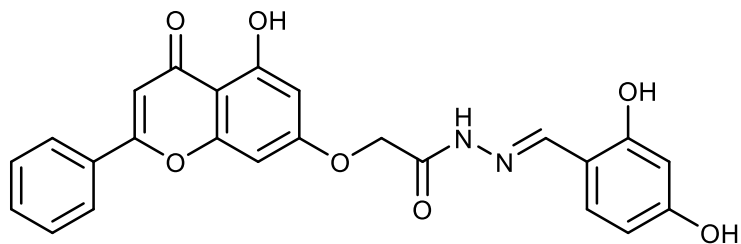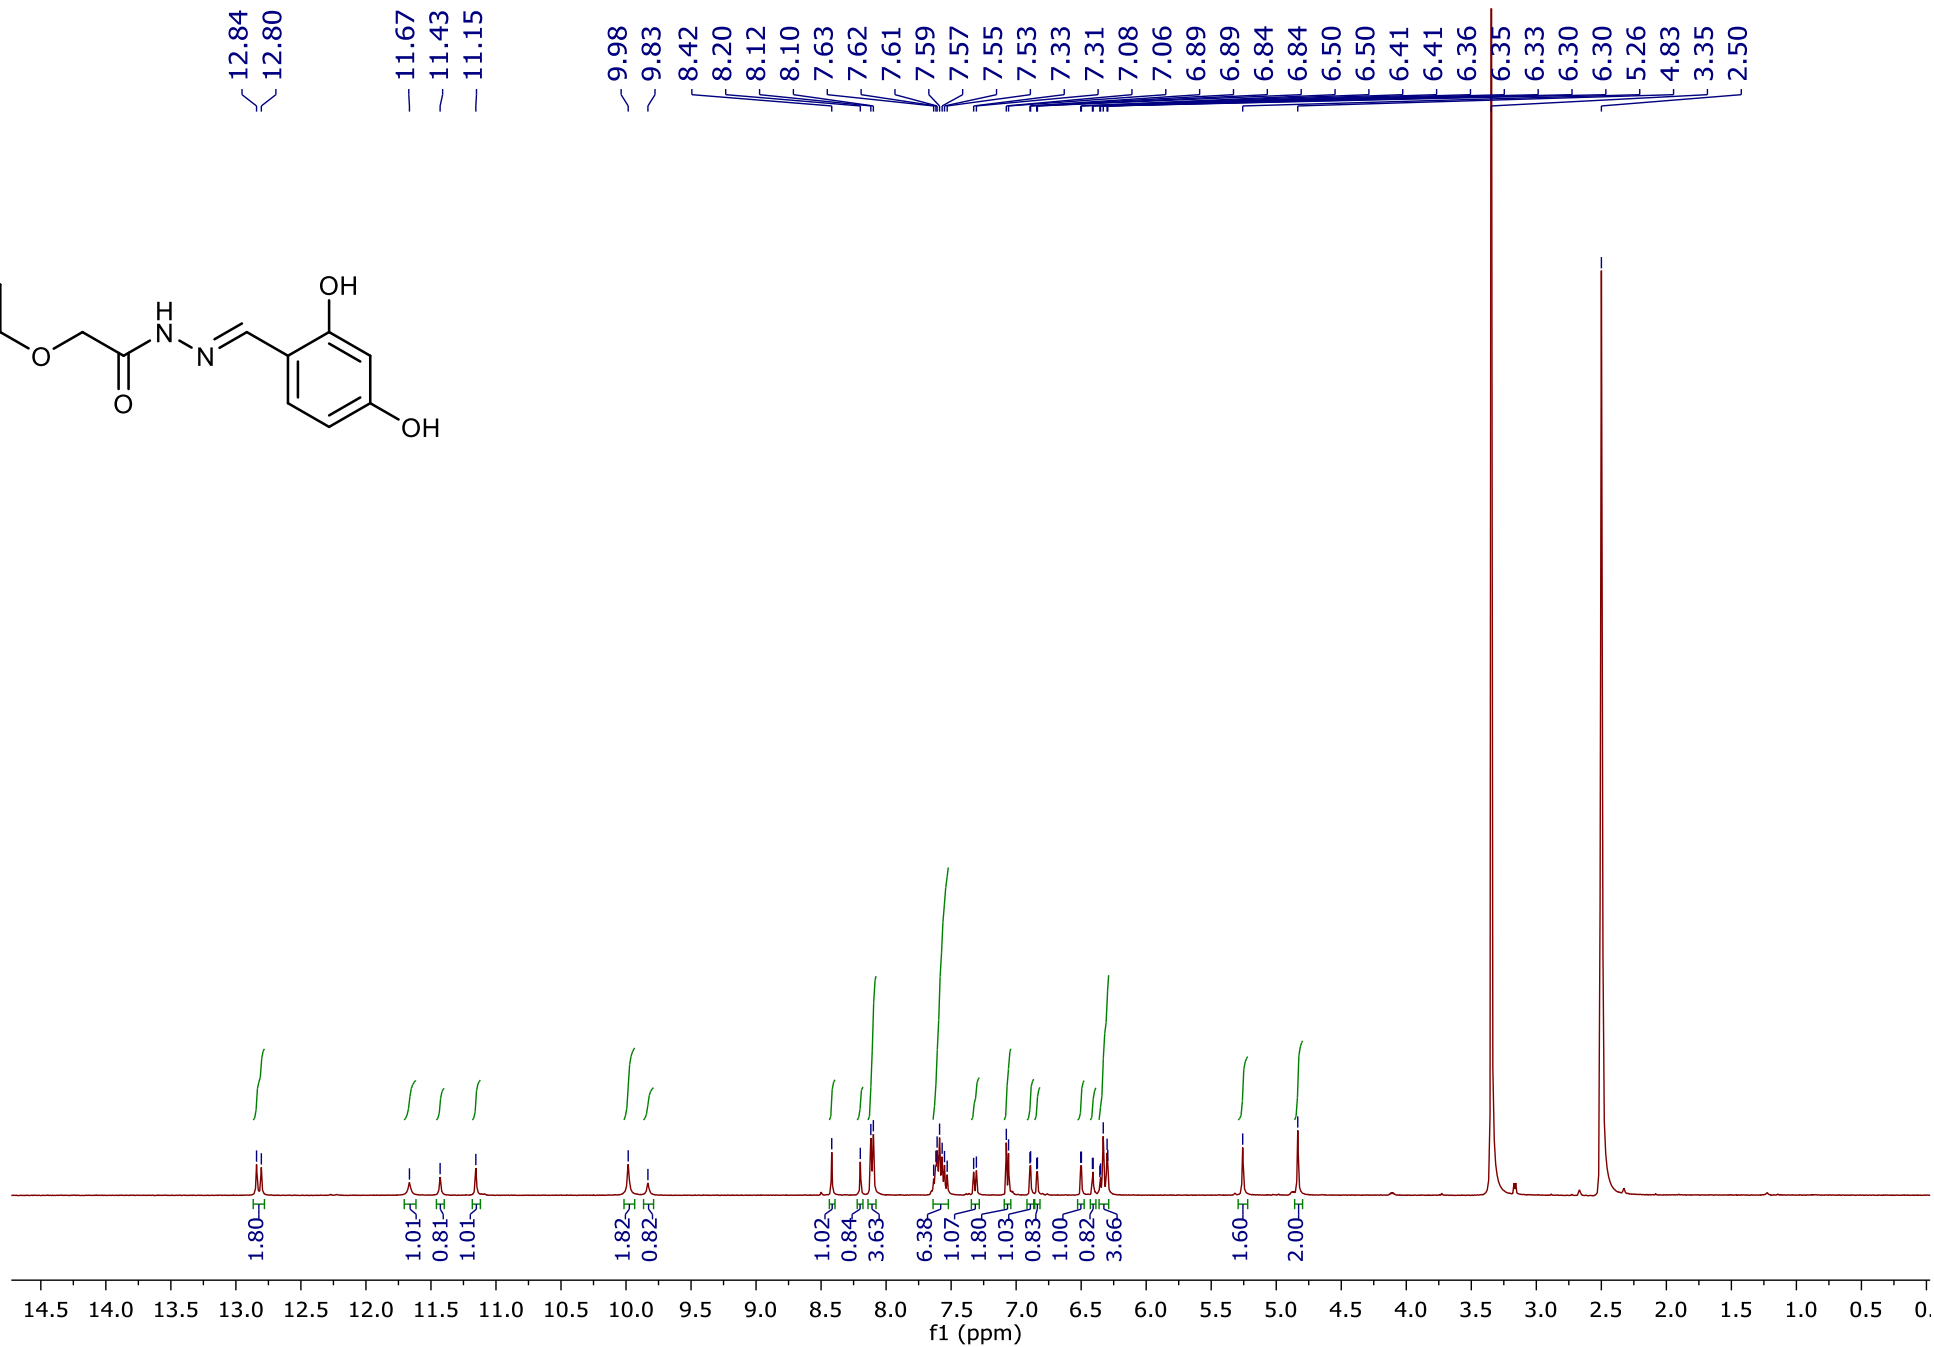

**S15.** <sup>1</sup>H NMR of Compound **4g**

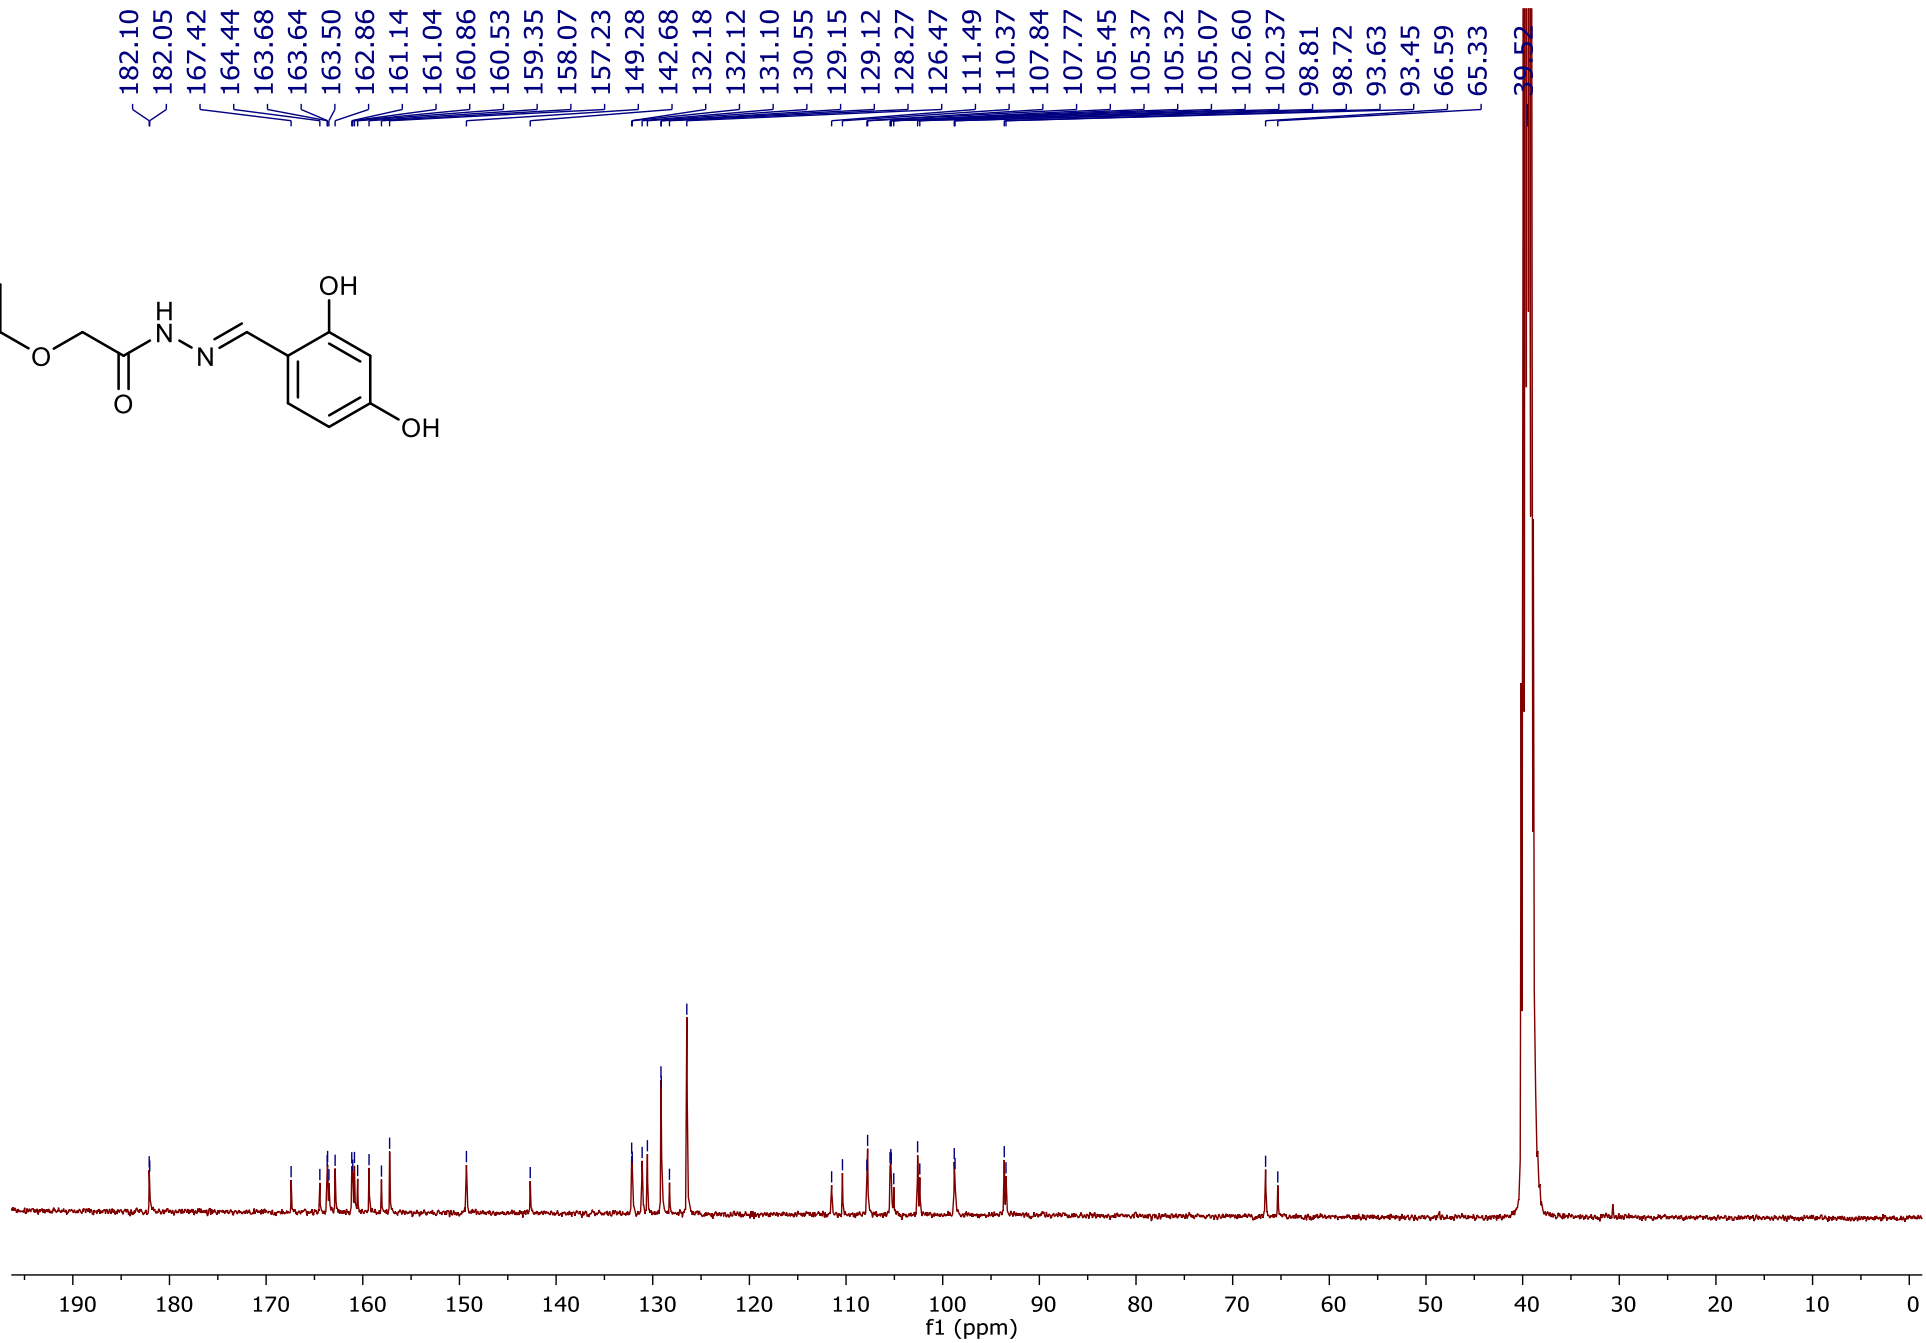

**S16.**  $^{13}\text{C}$  NMR of Compound **4g**



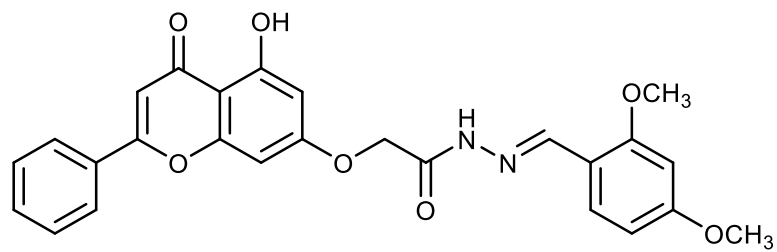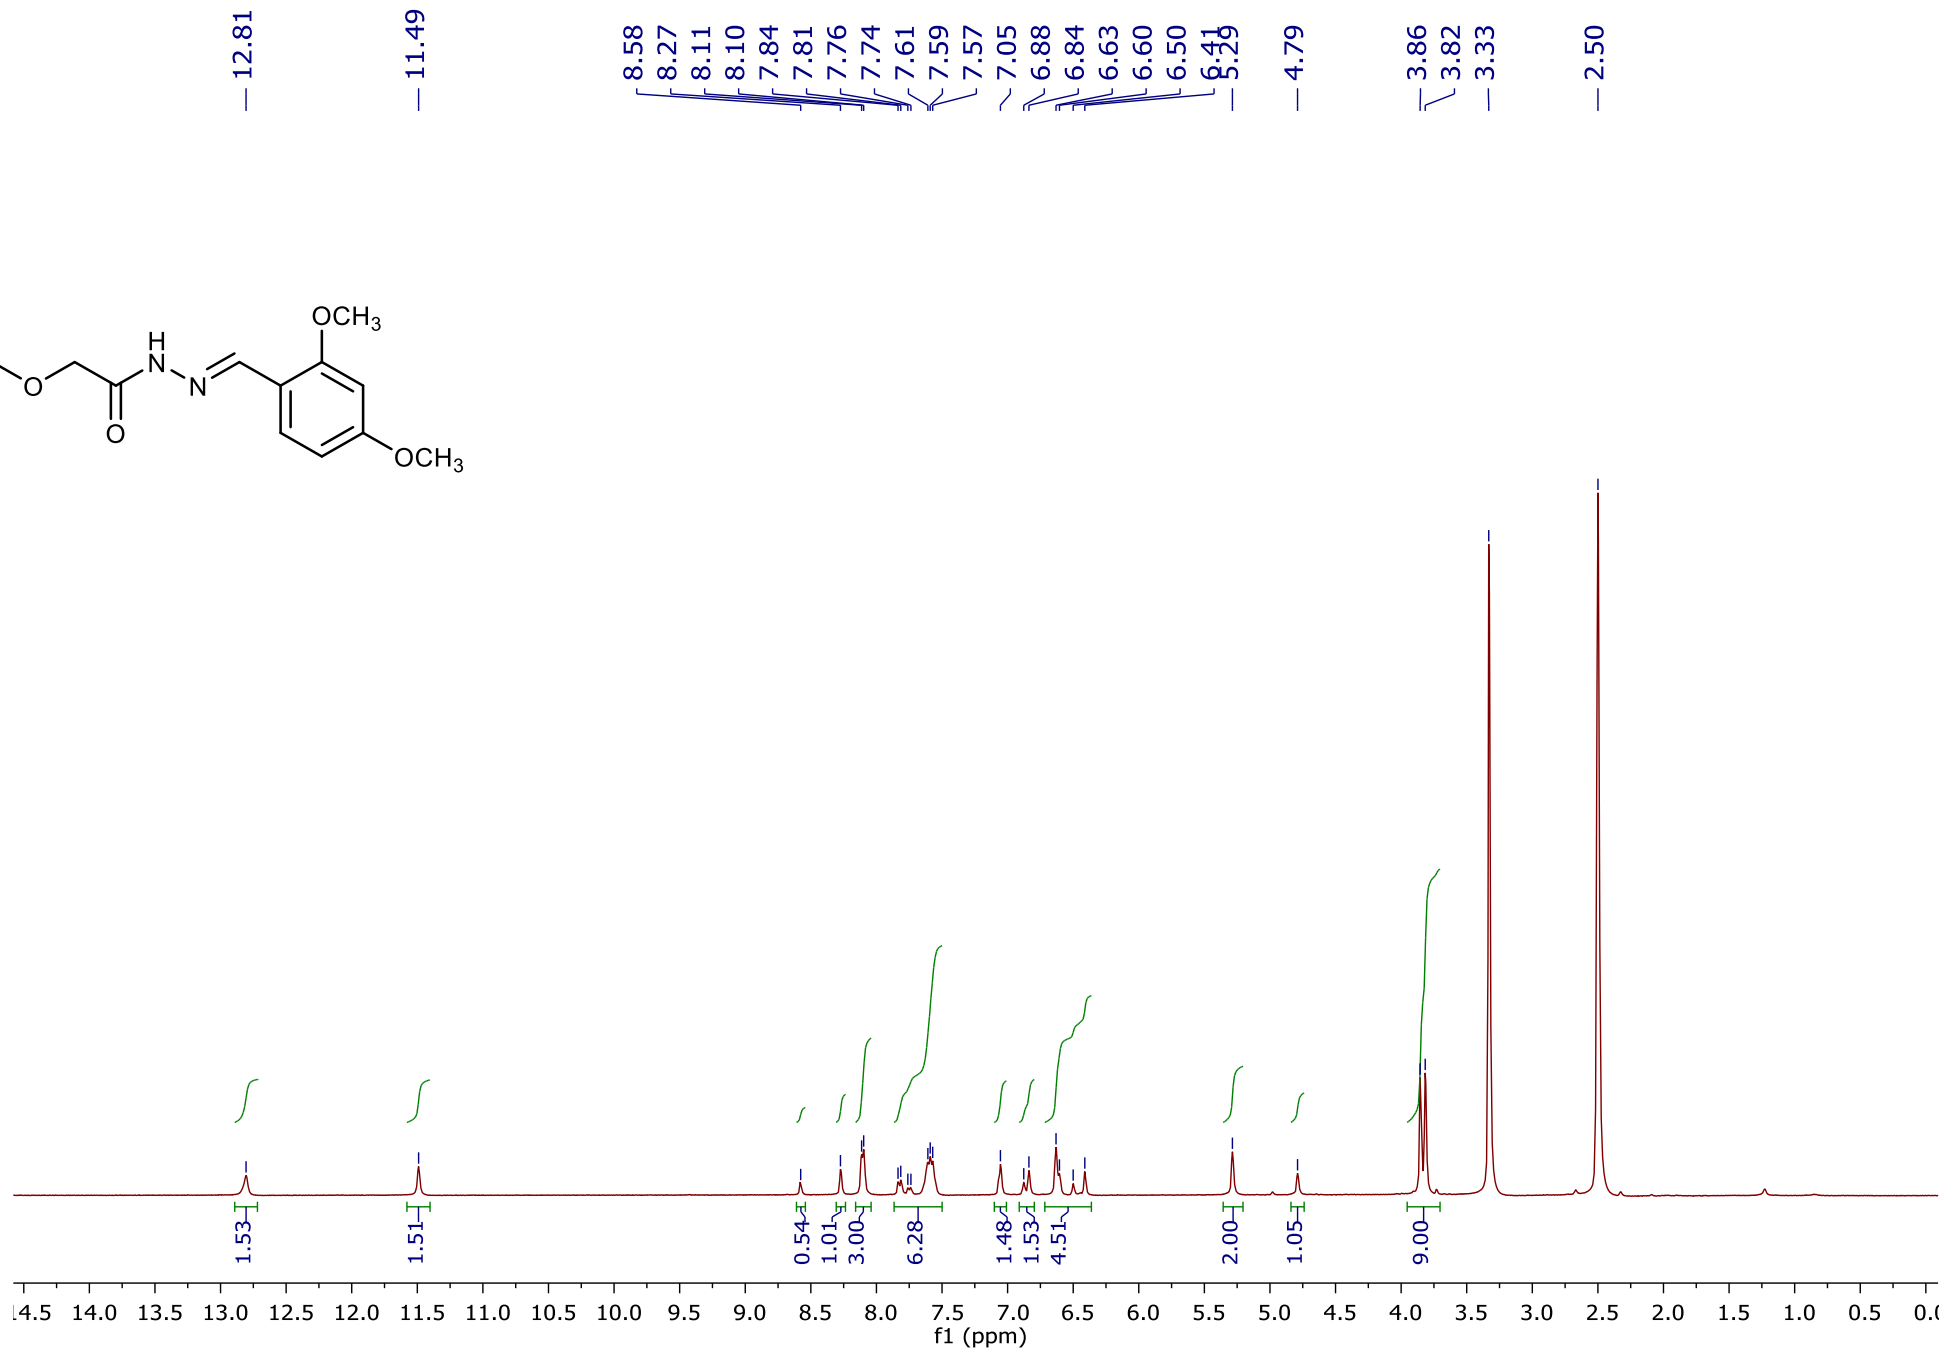

**S17.** <sup>1</sup>H NMR of Compound **4h**

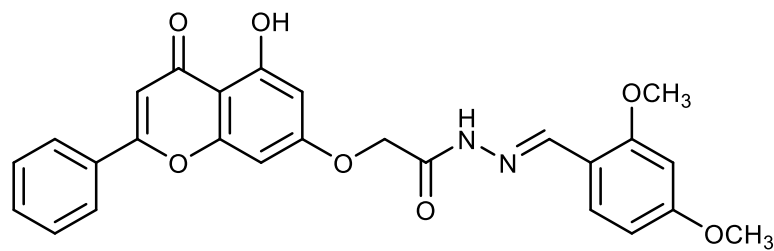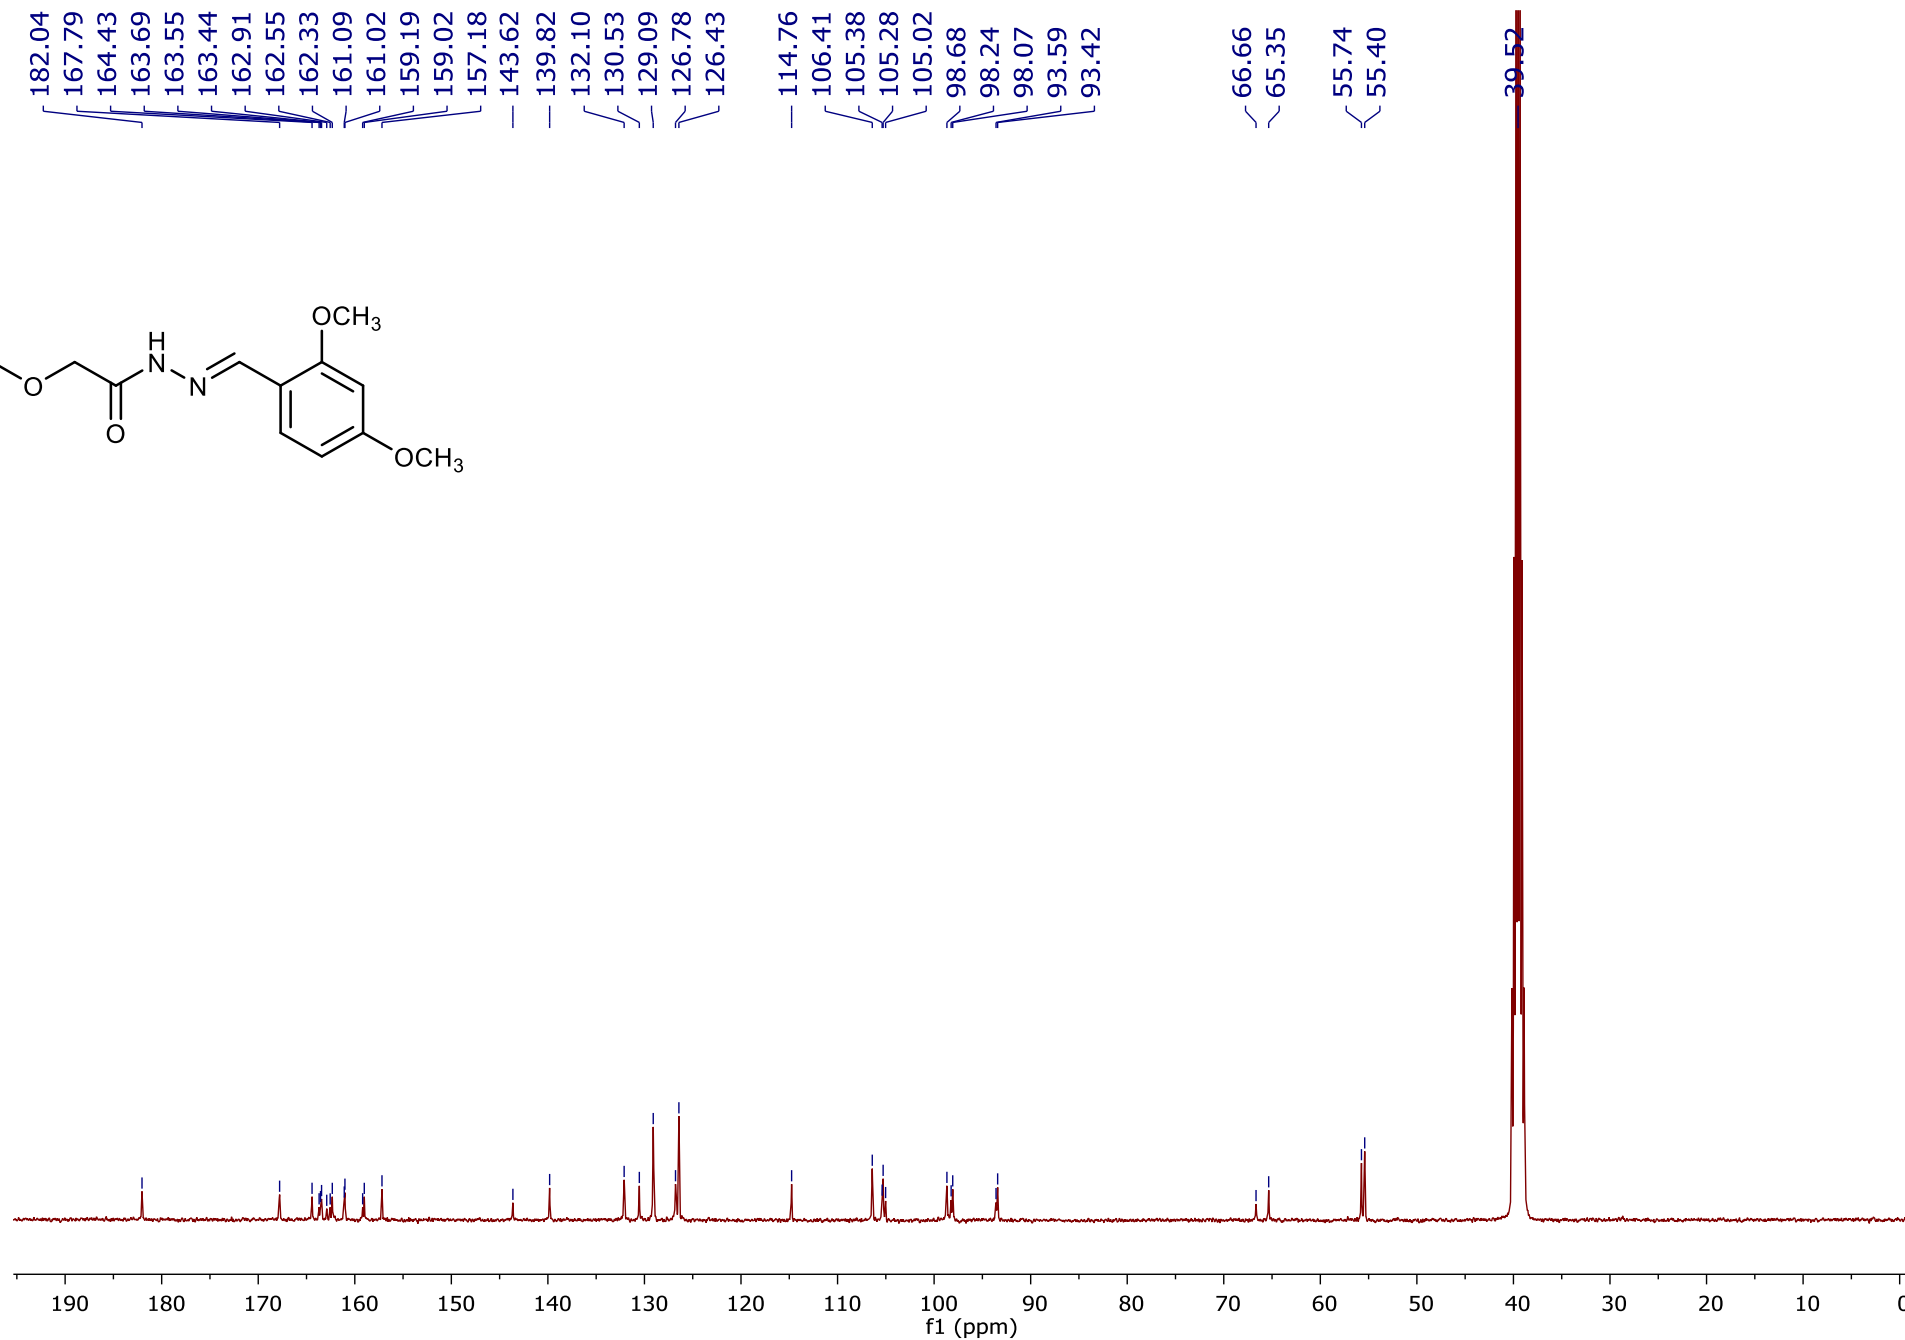

**S18.**  $^{13}\text{C}$  NMR of Compound **4h**

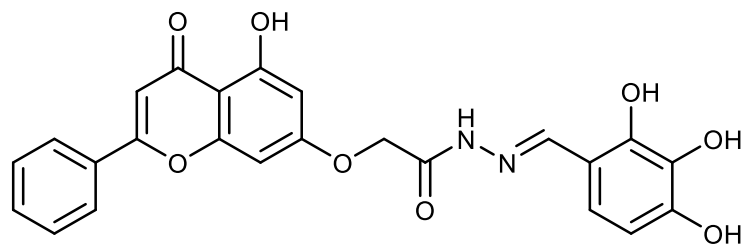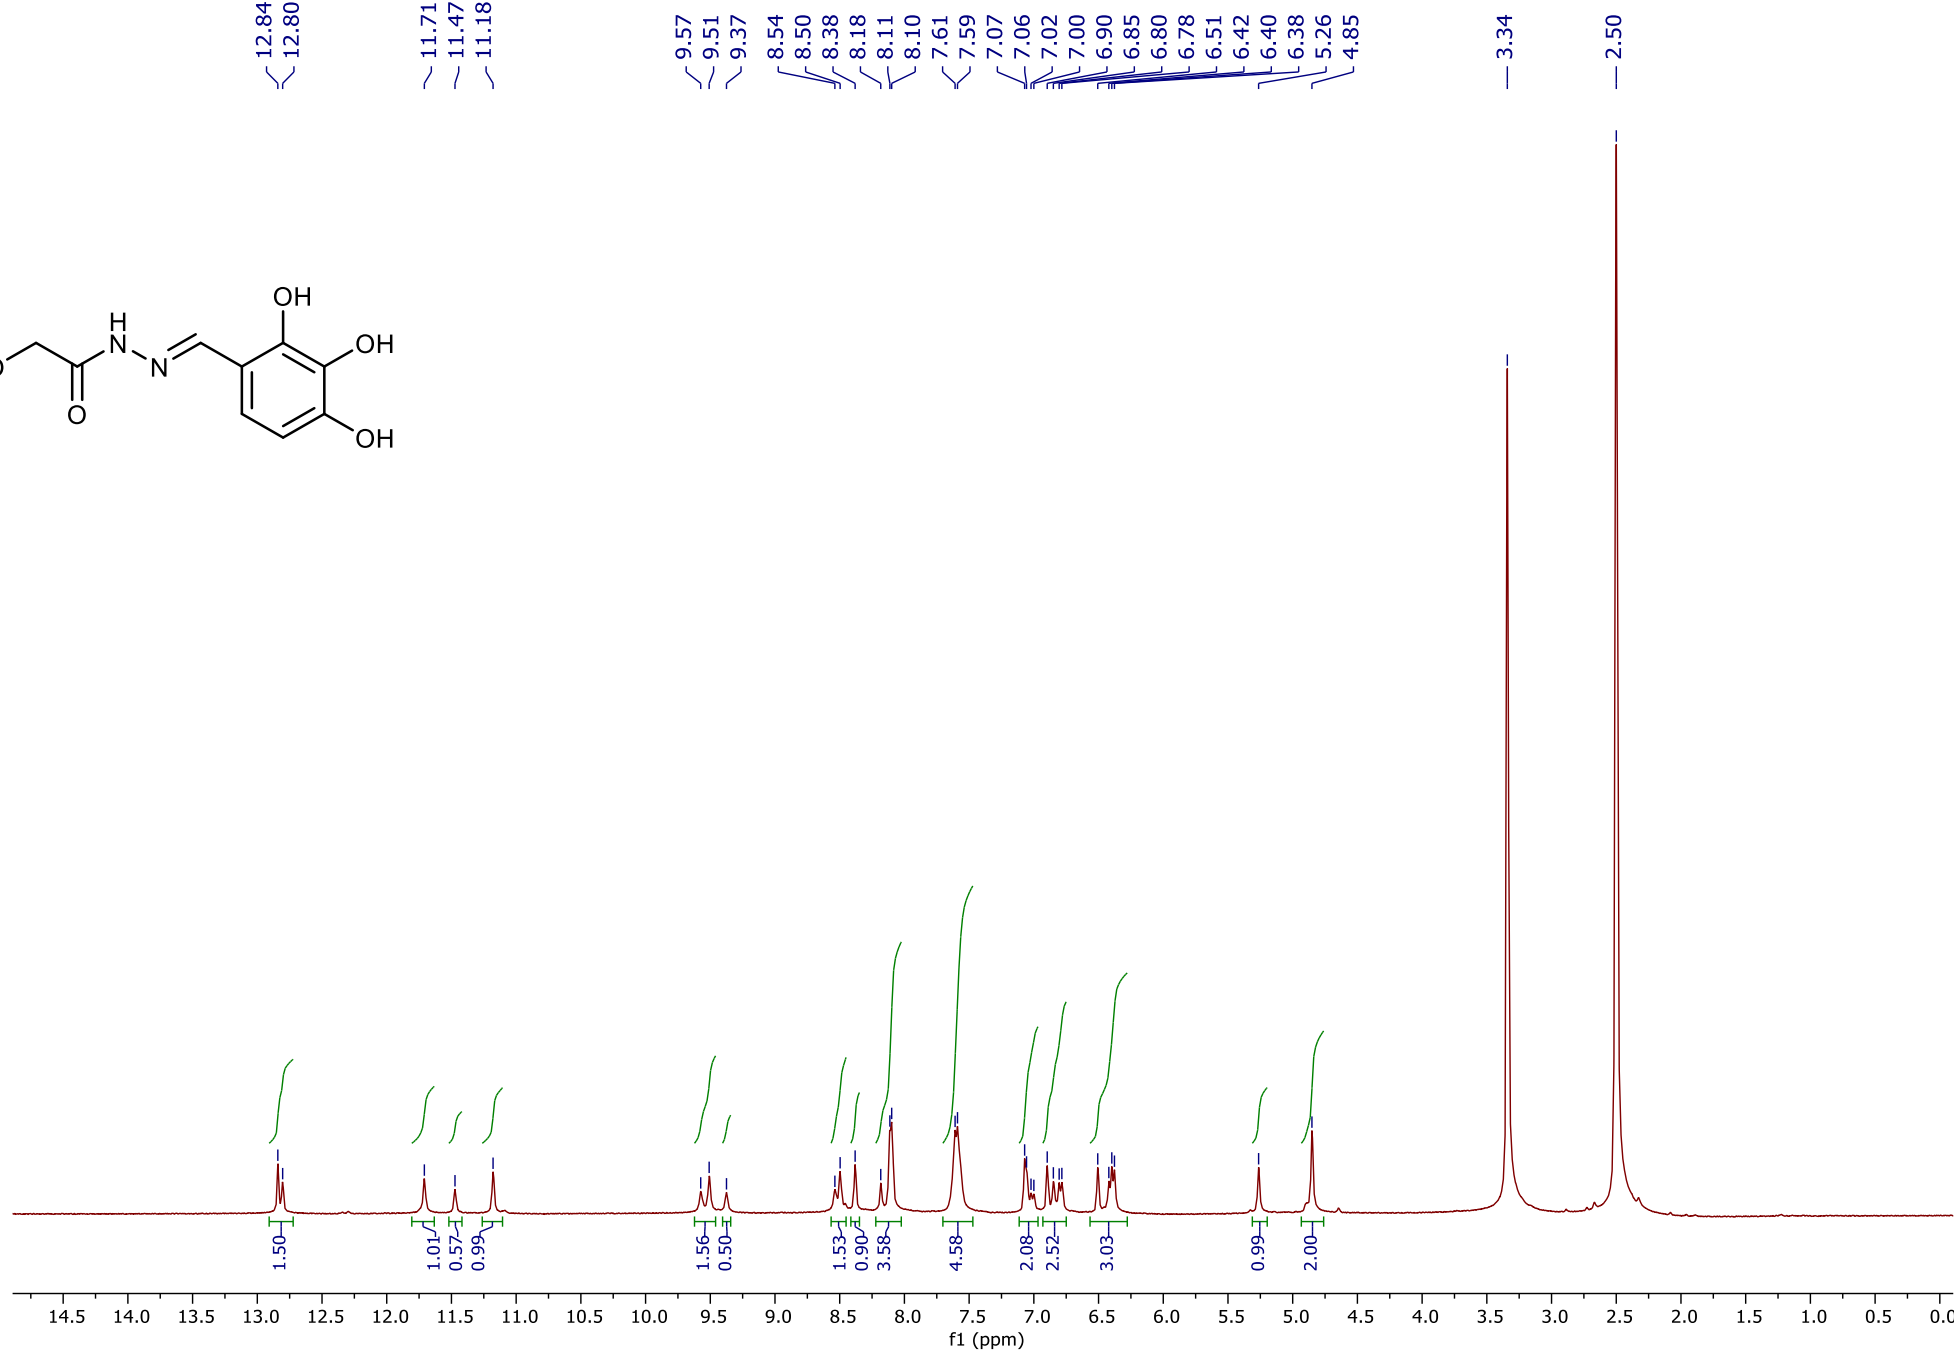

**S19.**  $^1\text{H}$  NMR of Compound **4i**

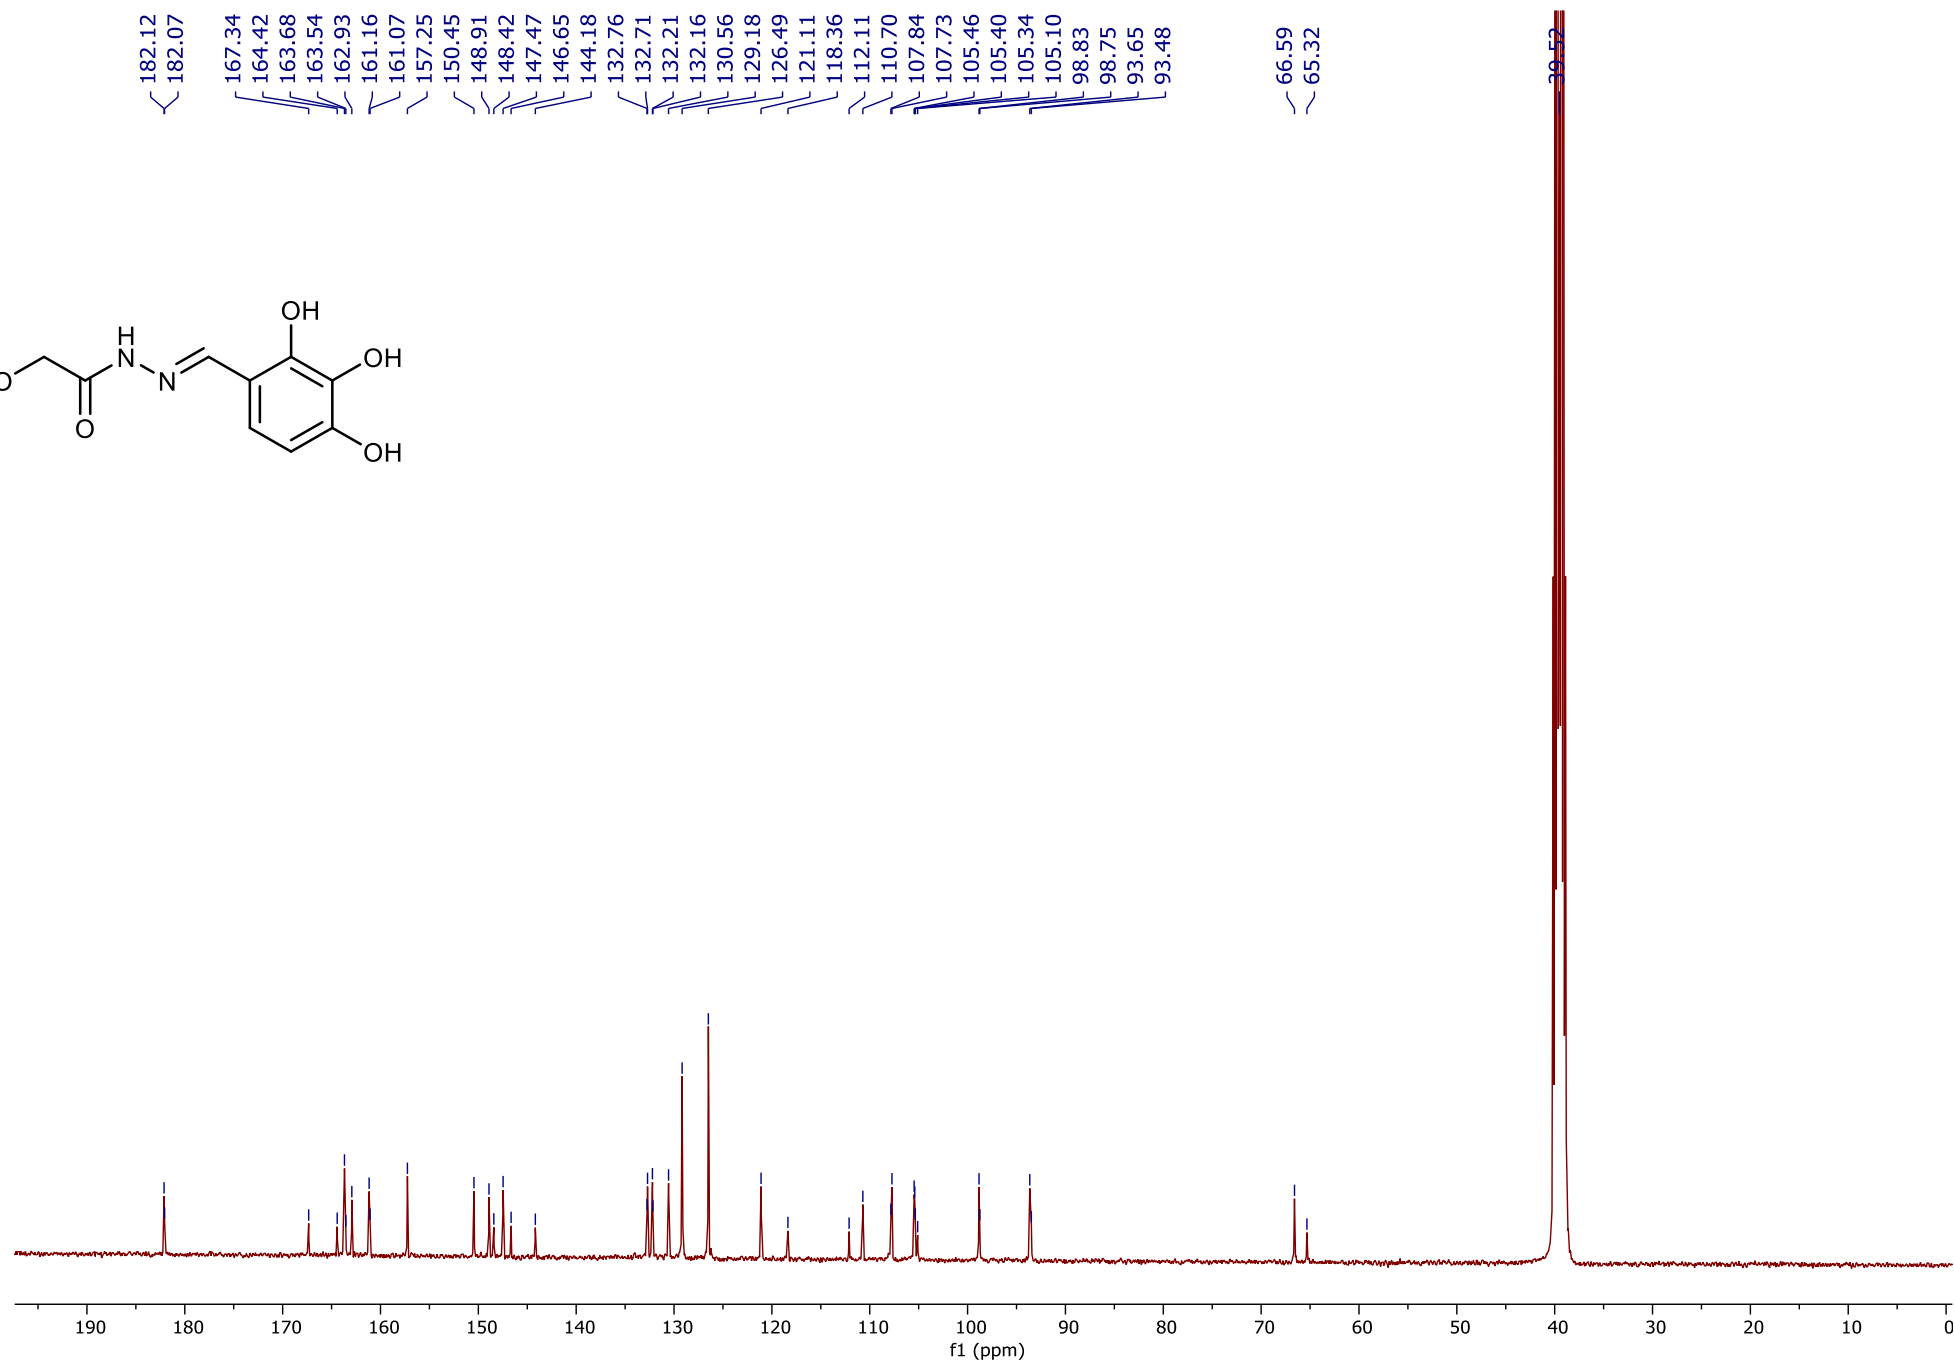

**S20.**  $^{13}\text{C}$  NMR of Compound **4i**

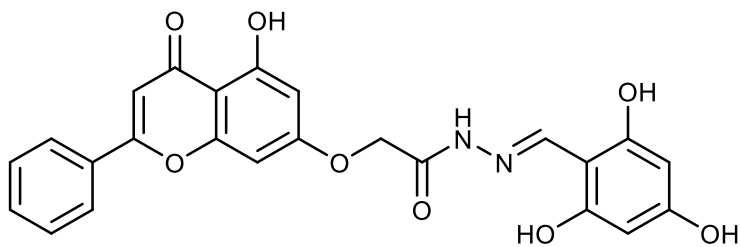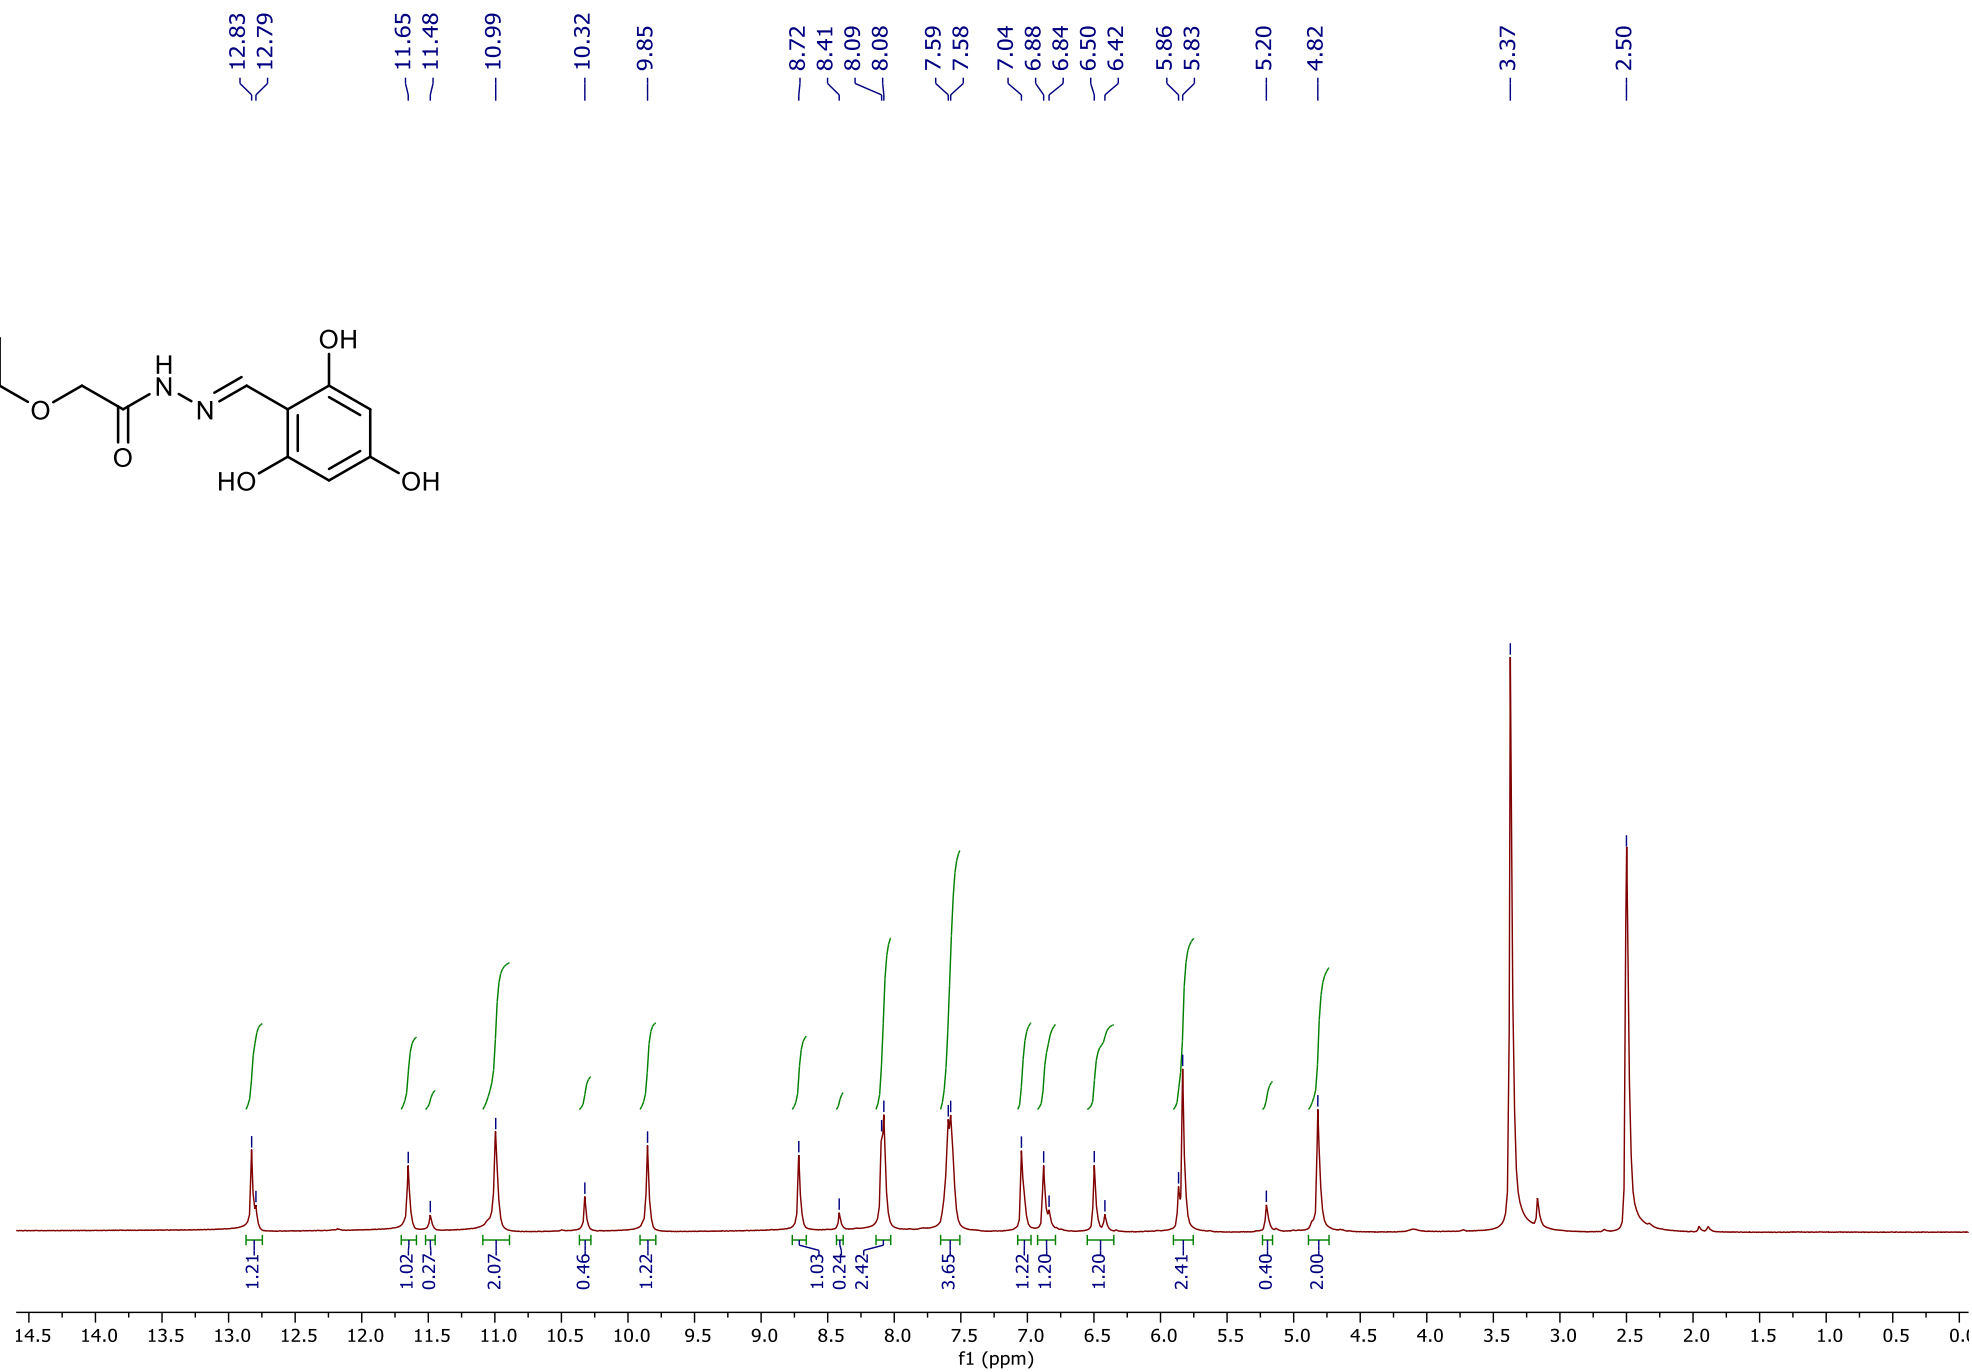

**S21.** <sup>1</sup>H NMR of Compound **4j**

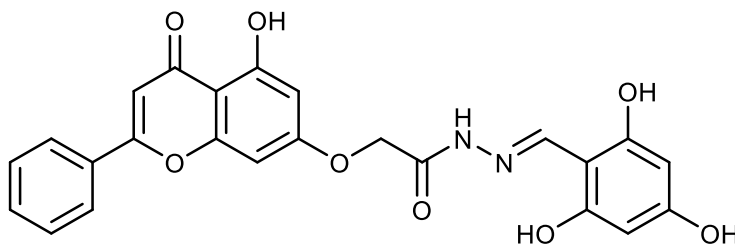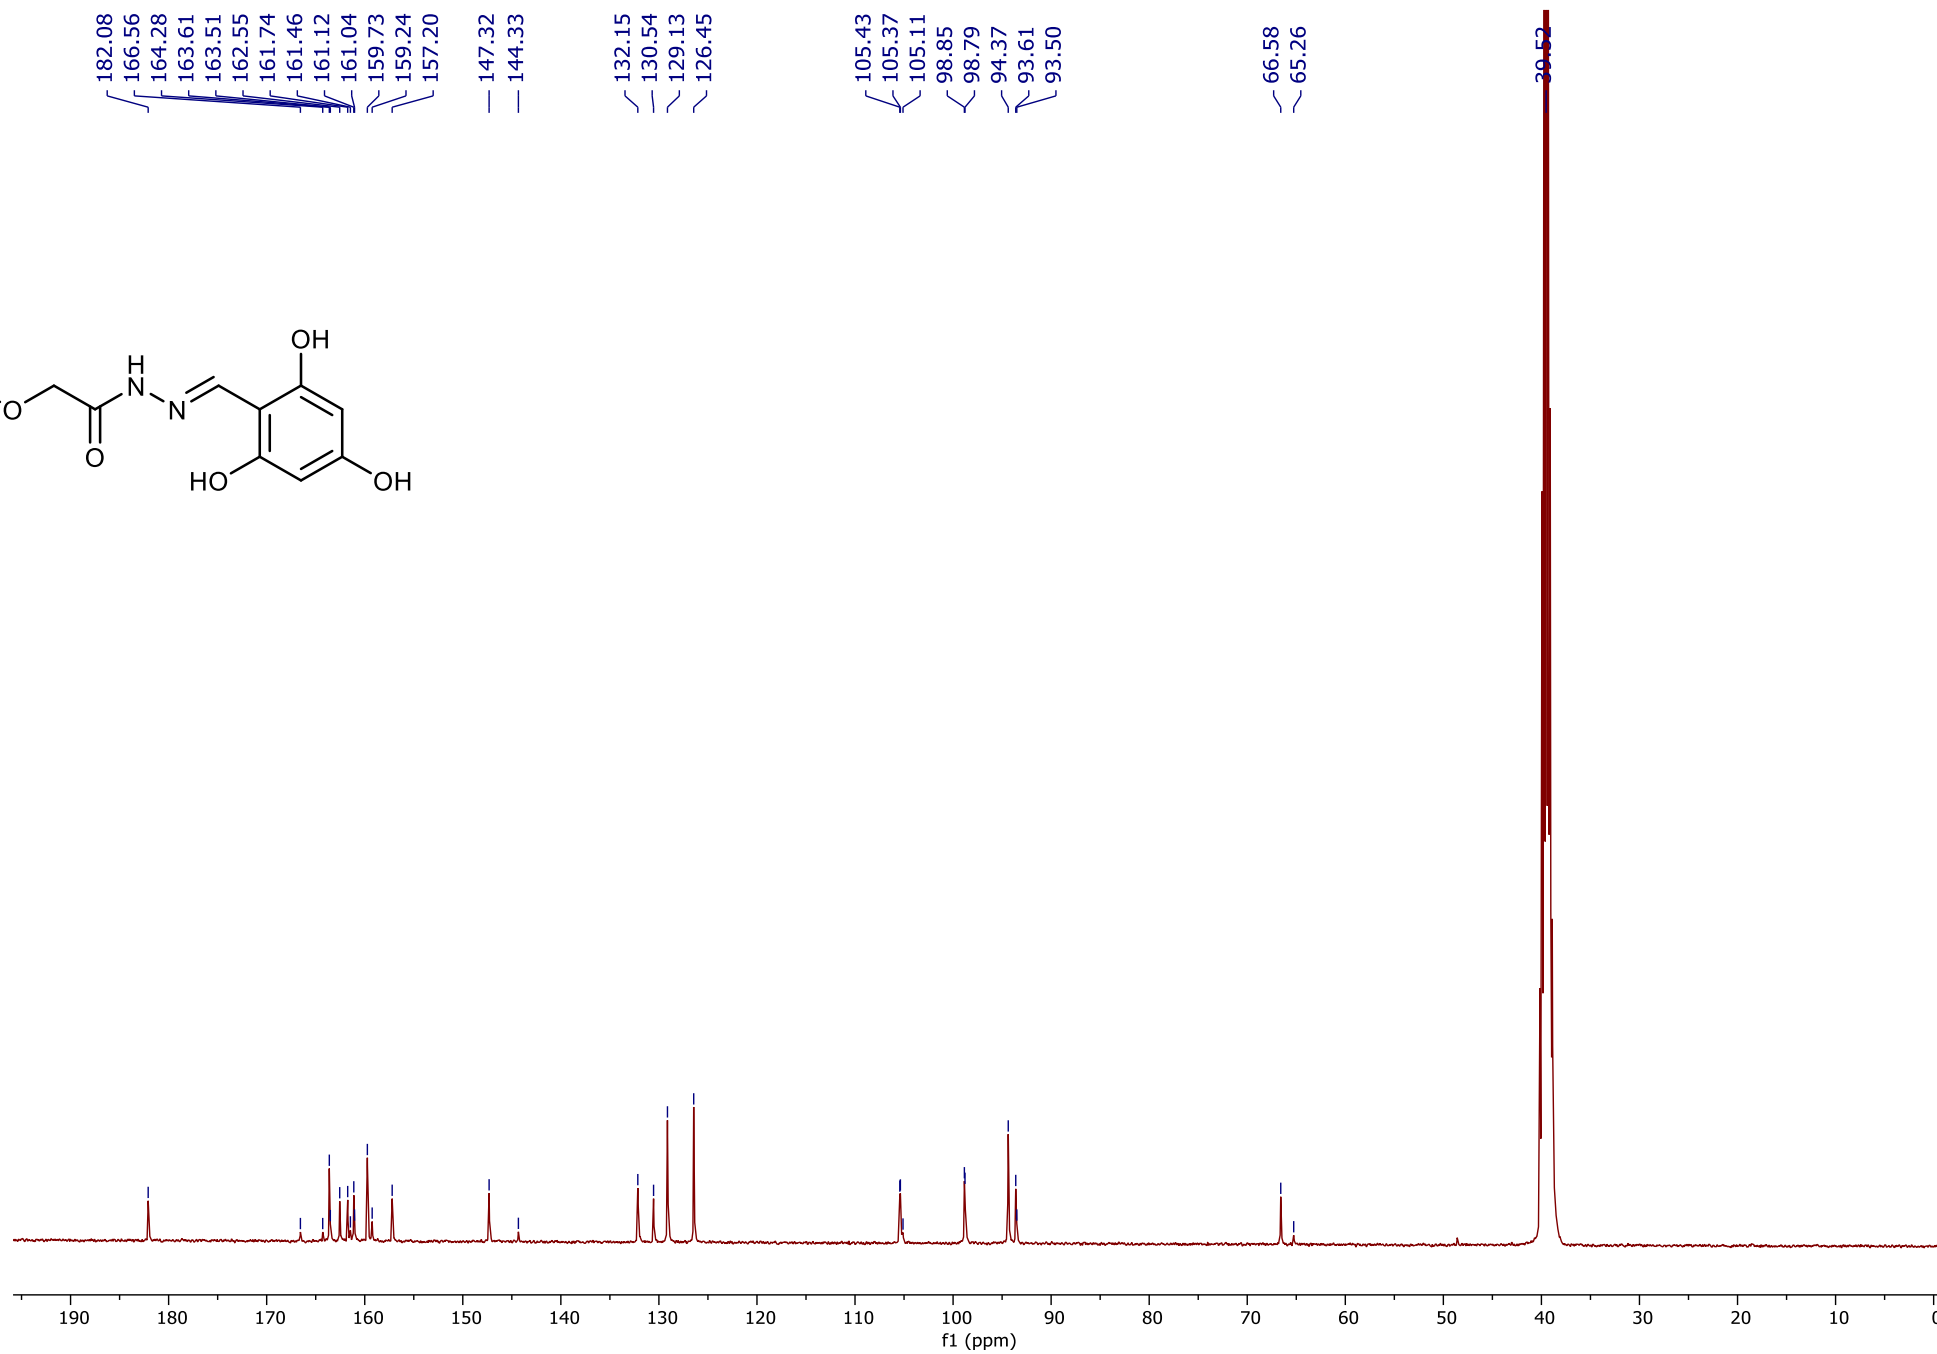

**S22.**  $^{13}\text{C}$  NMR of Compound **4j**

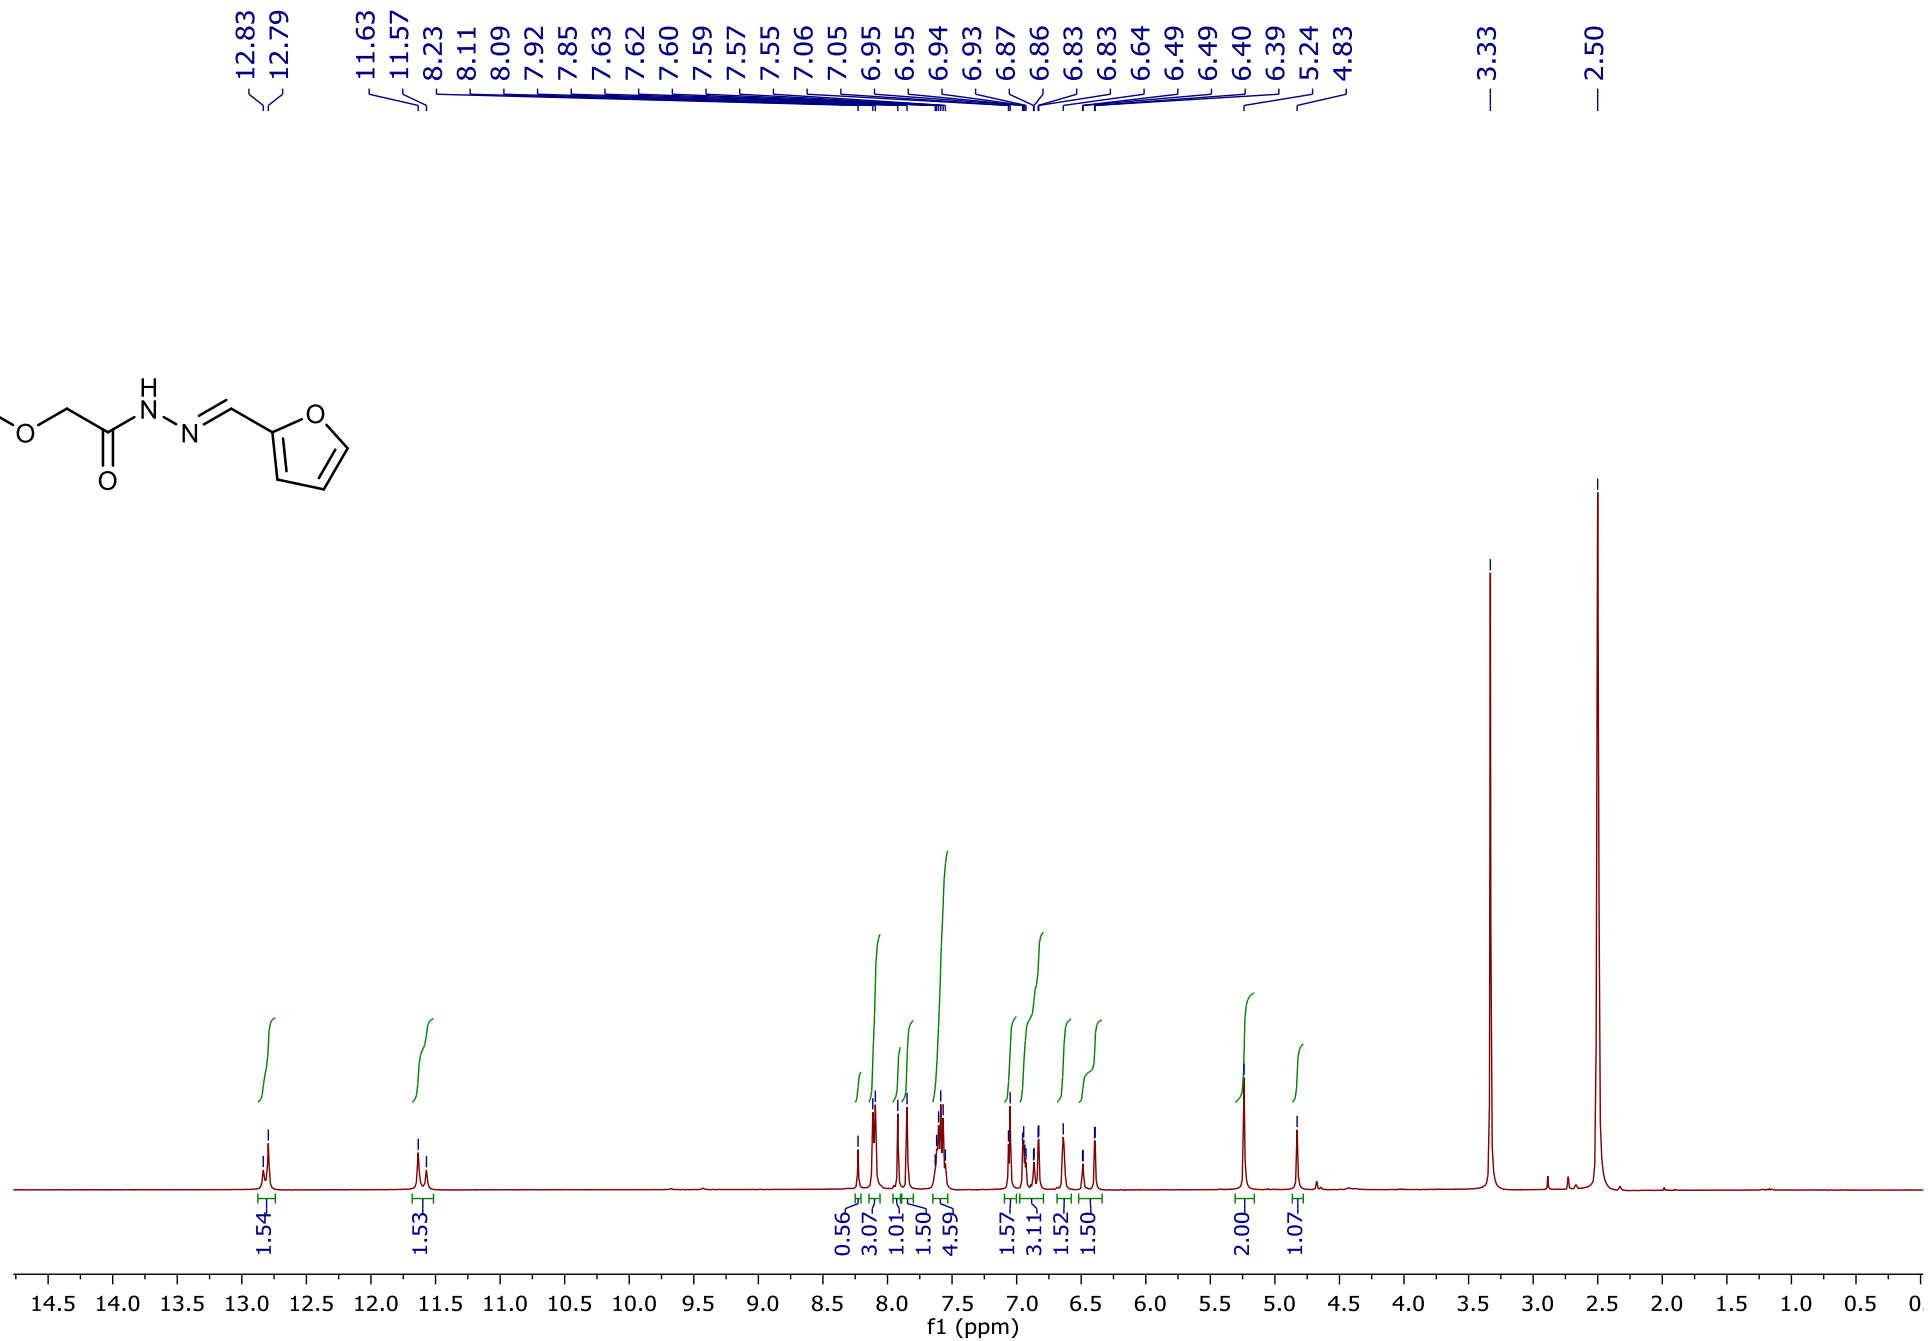

S23. <sup>1</sup>H NMR of Compound 4k

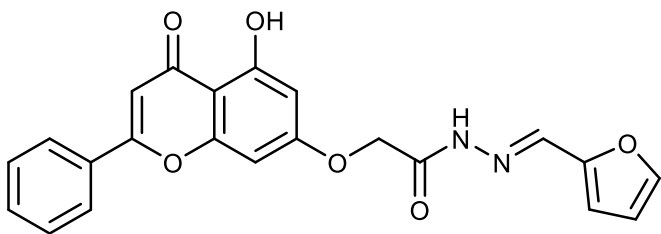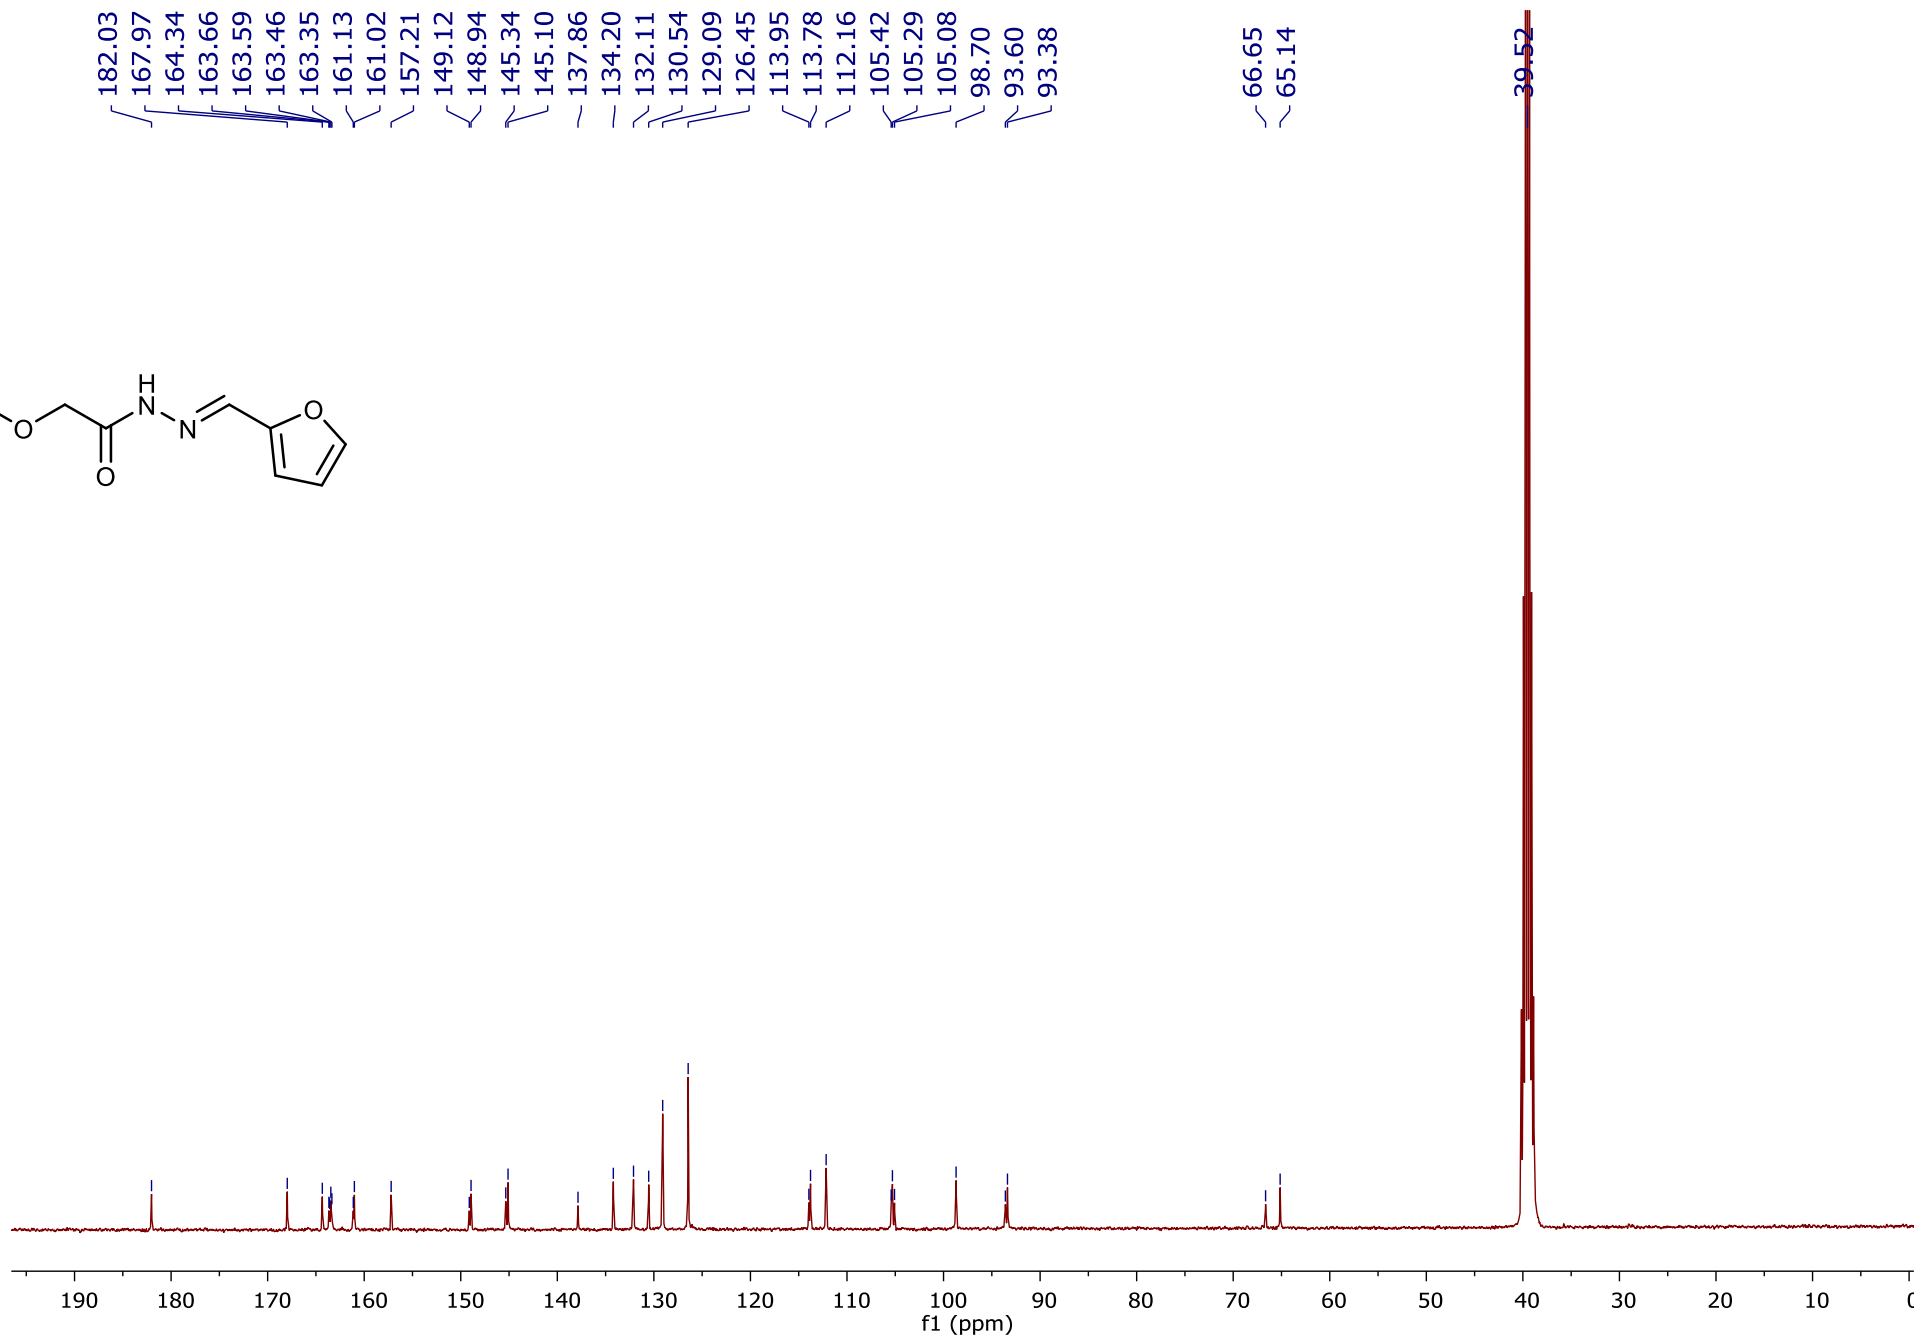

**S24.**  $^{13}\text{C}$  NMR of Compound **4k**



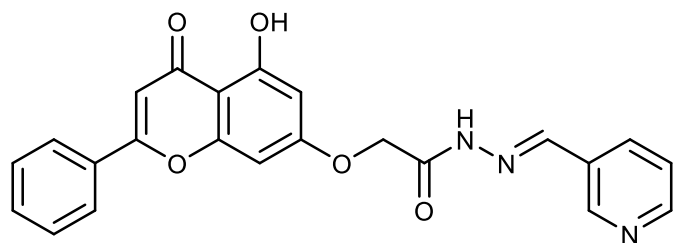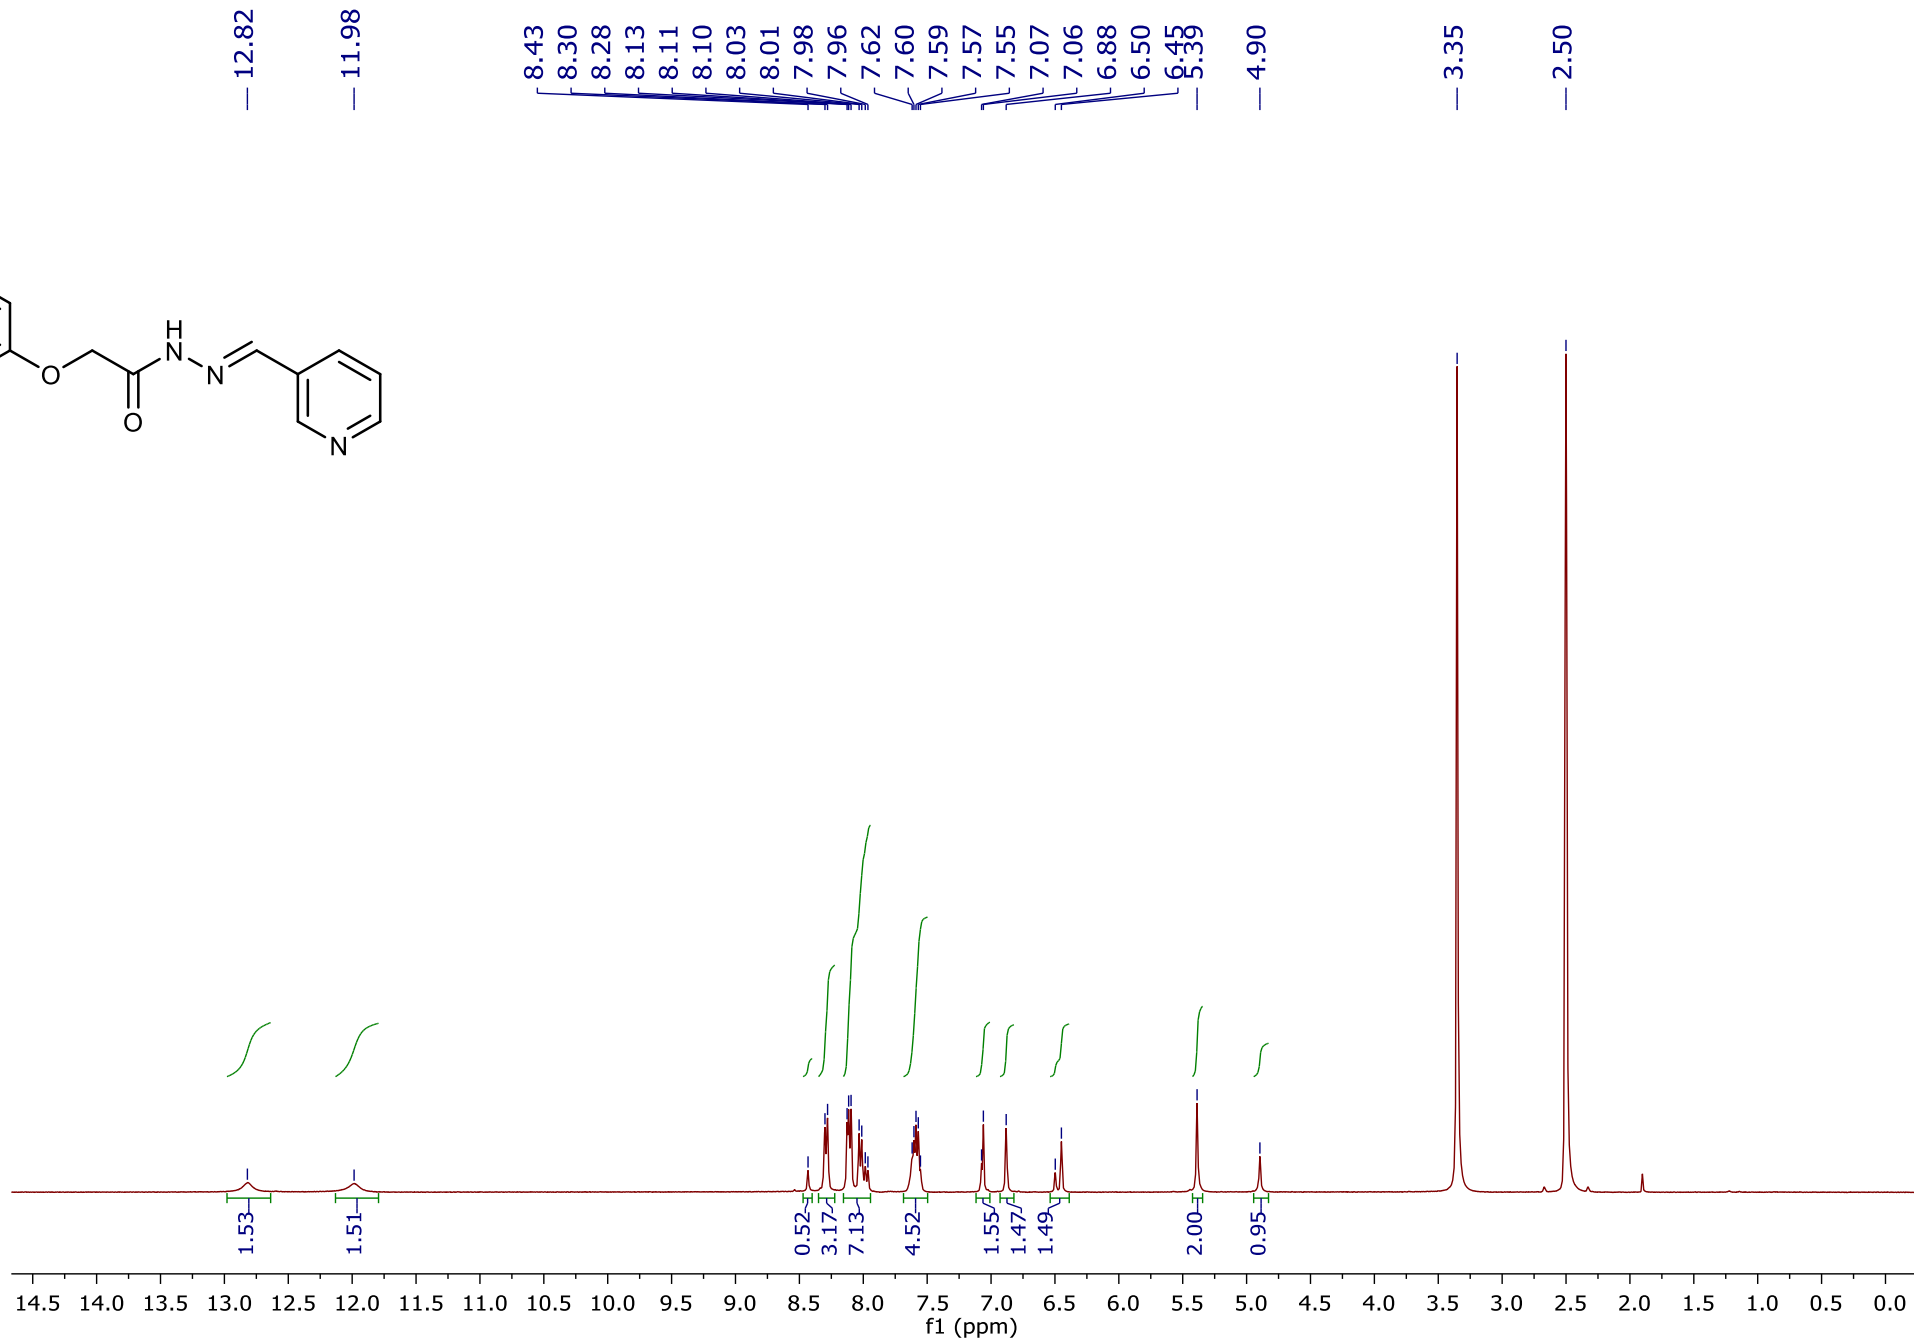

**S25.** <sup>1</sup>H NMR of Compound **41**

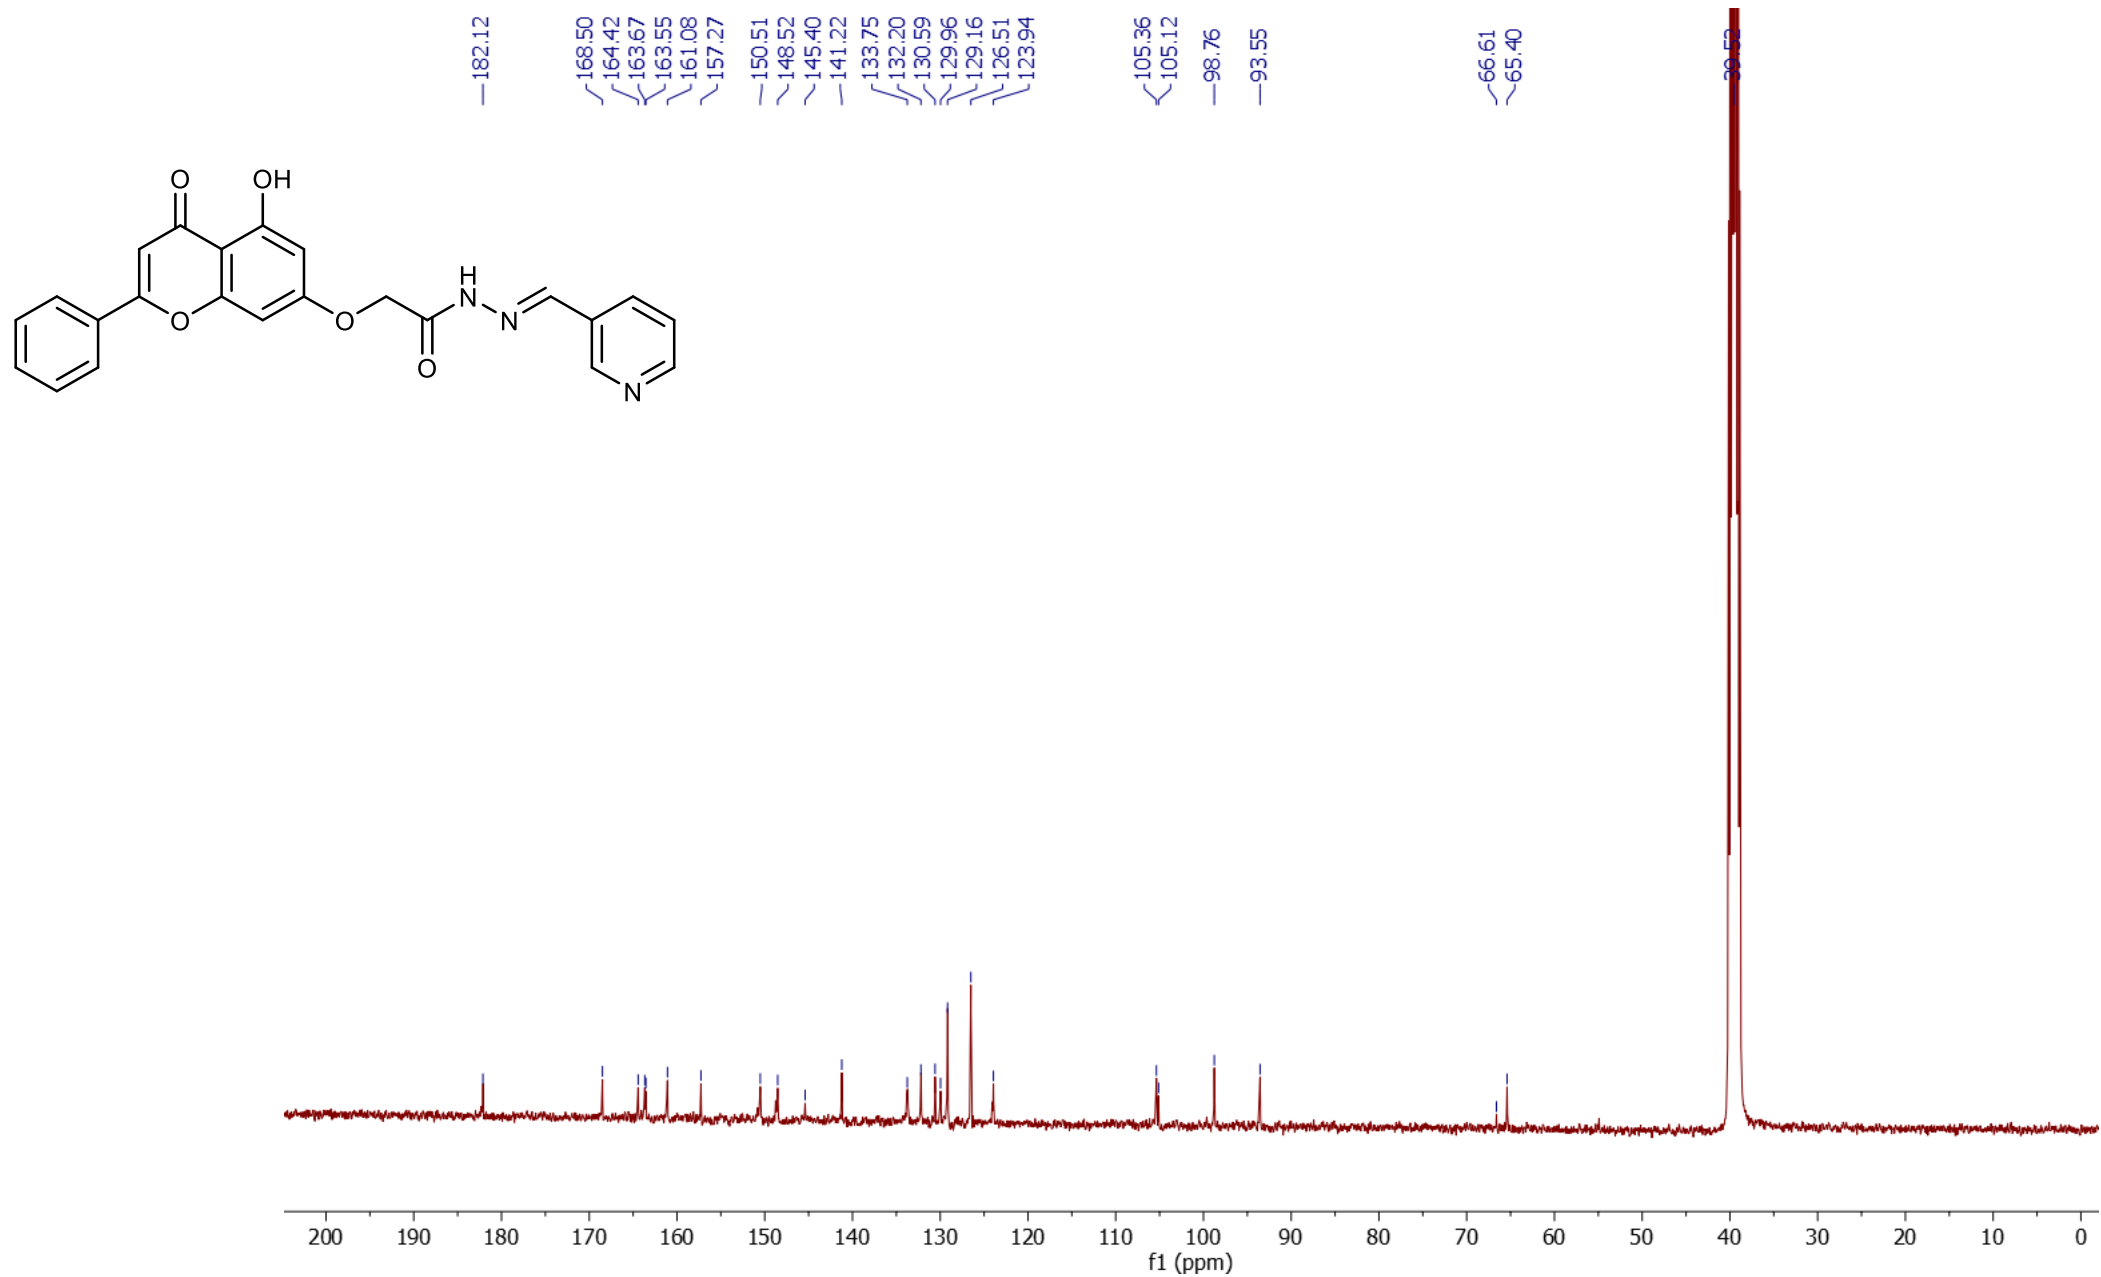

S26. <sup>13</sup>C NMR of Compound 4l

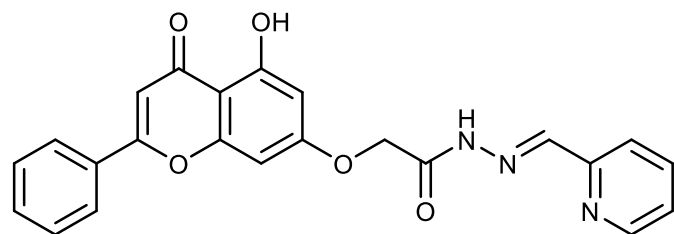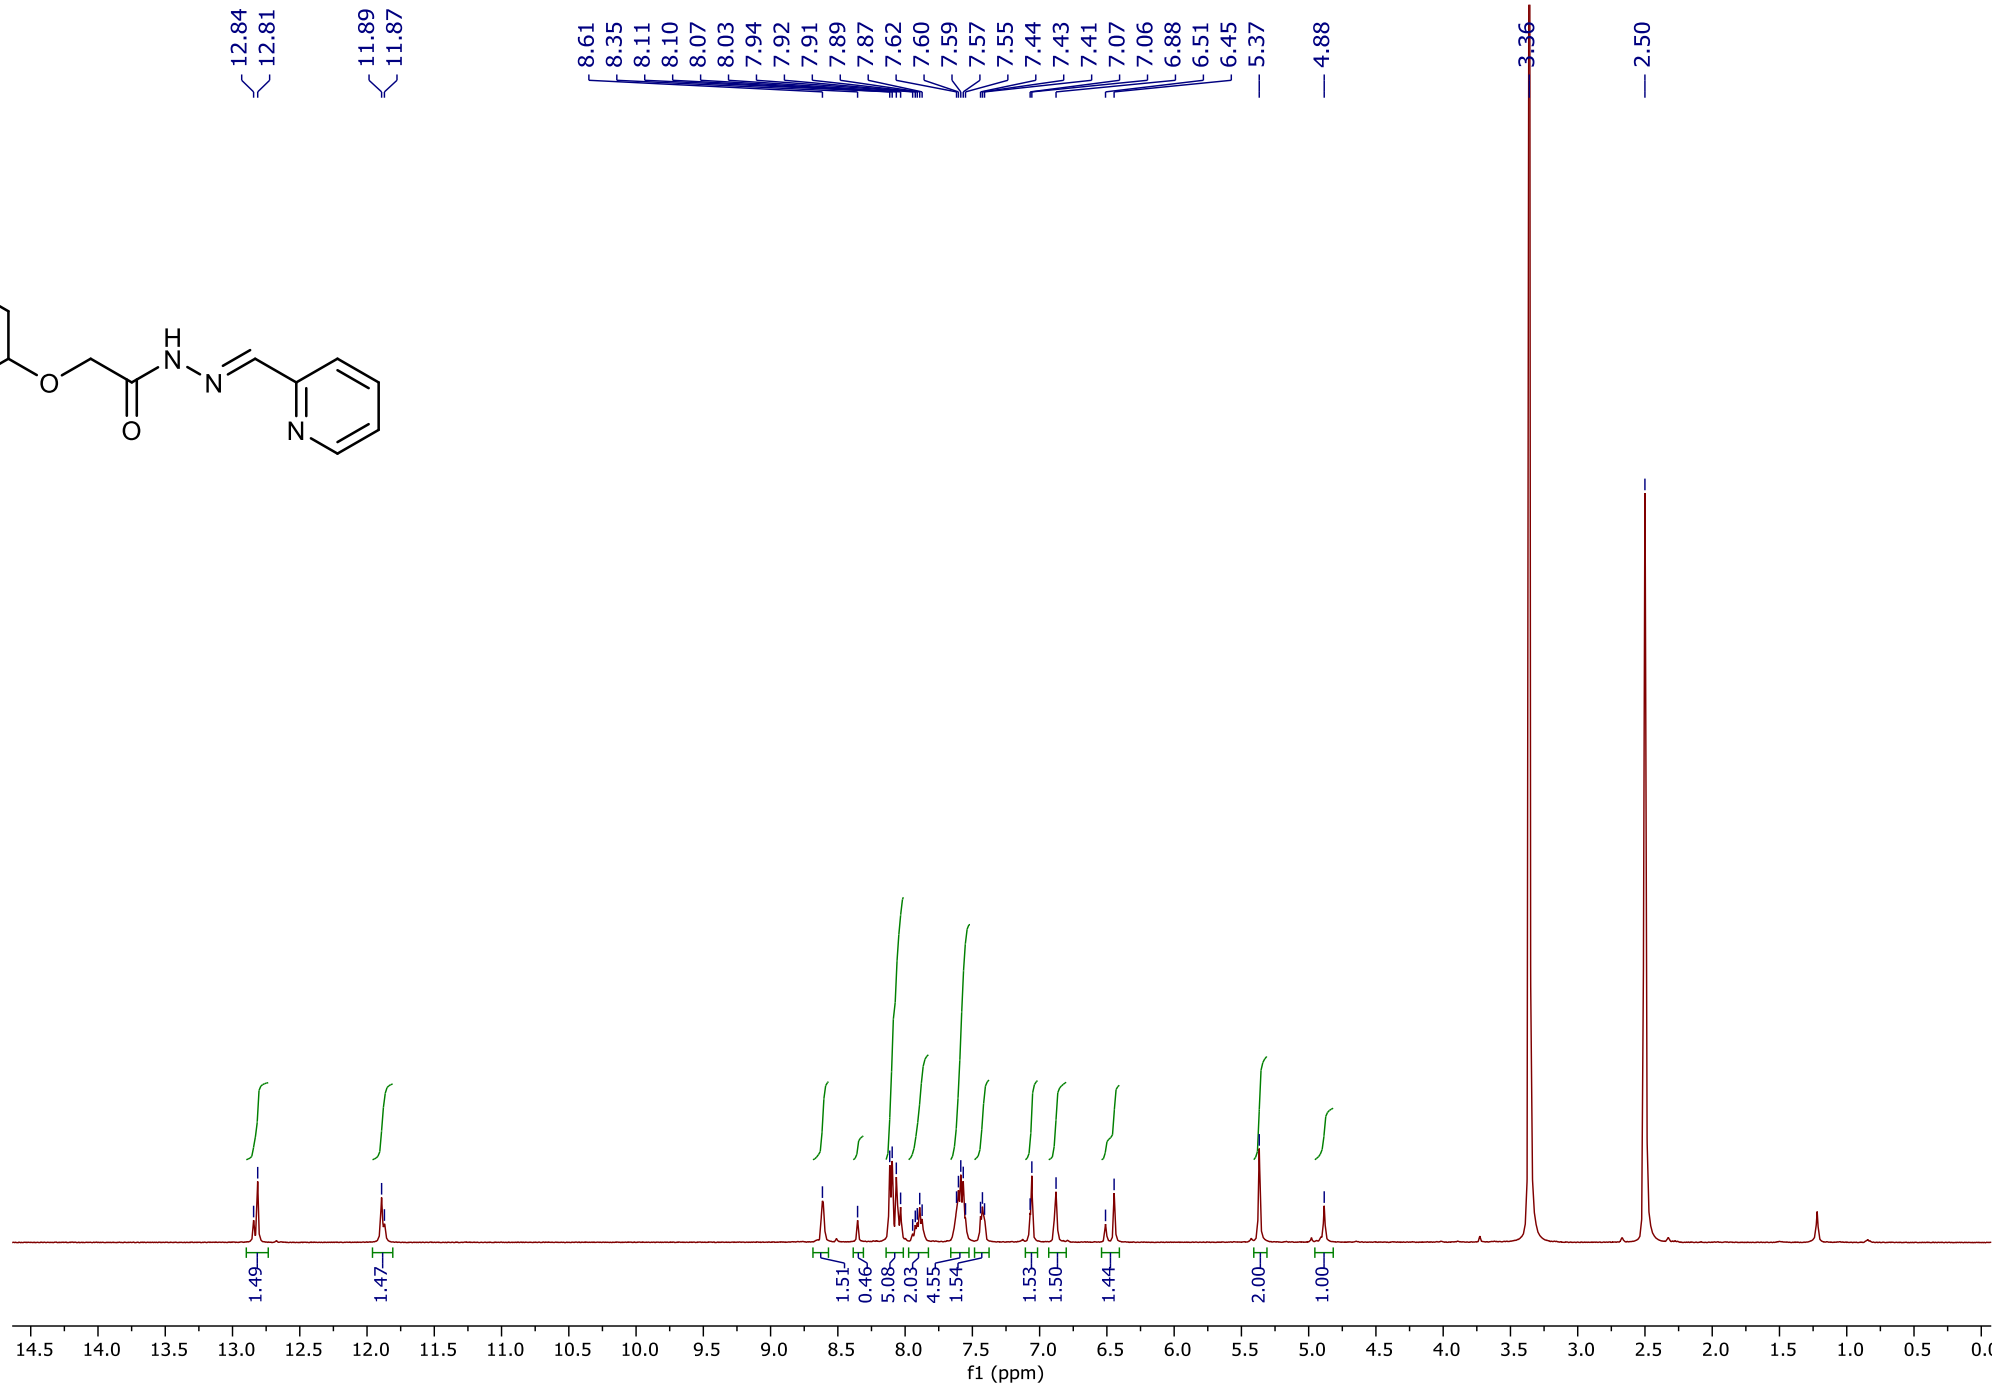

**S27.**  $^1\text{H}$  NMR of Compound **4m**

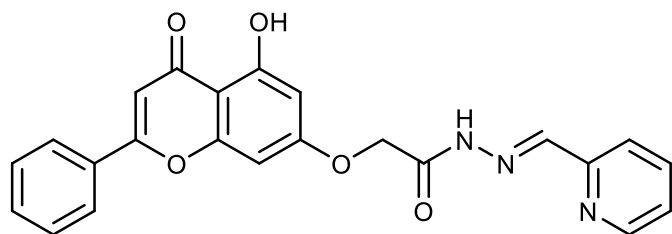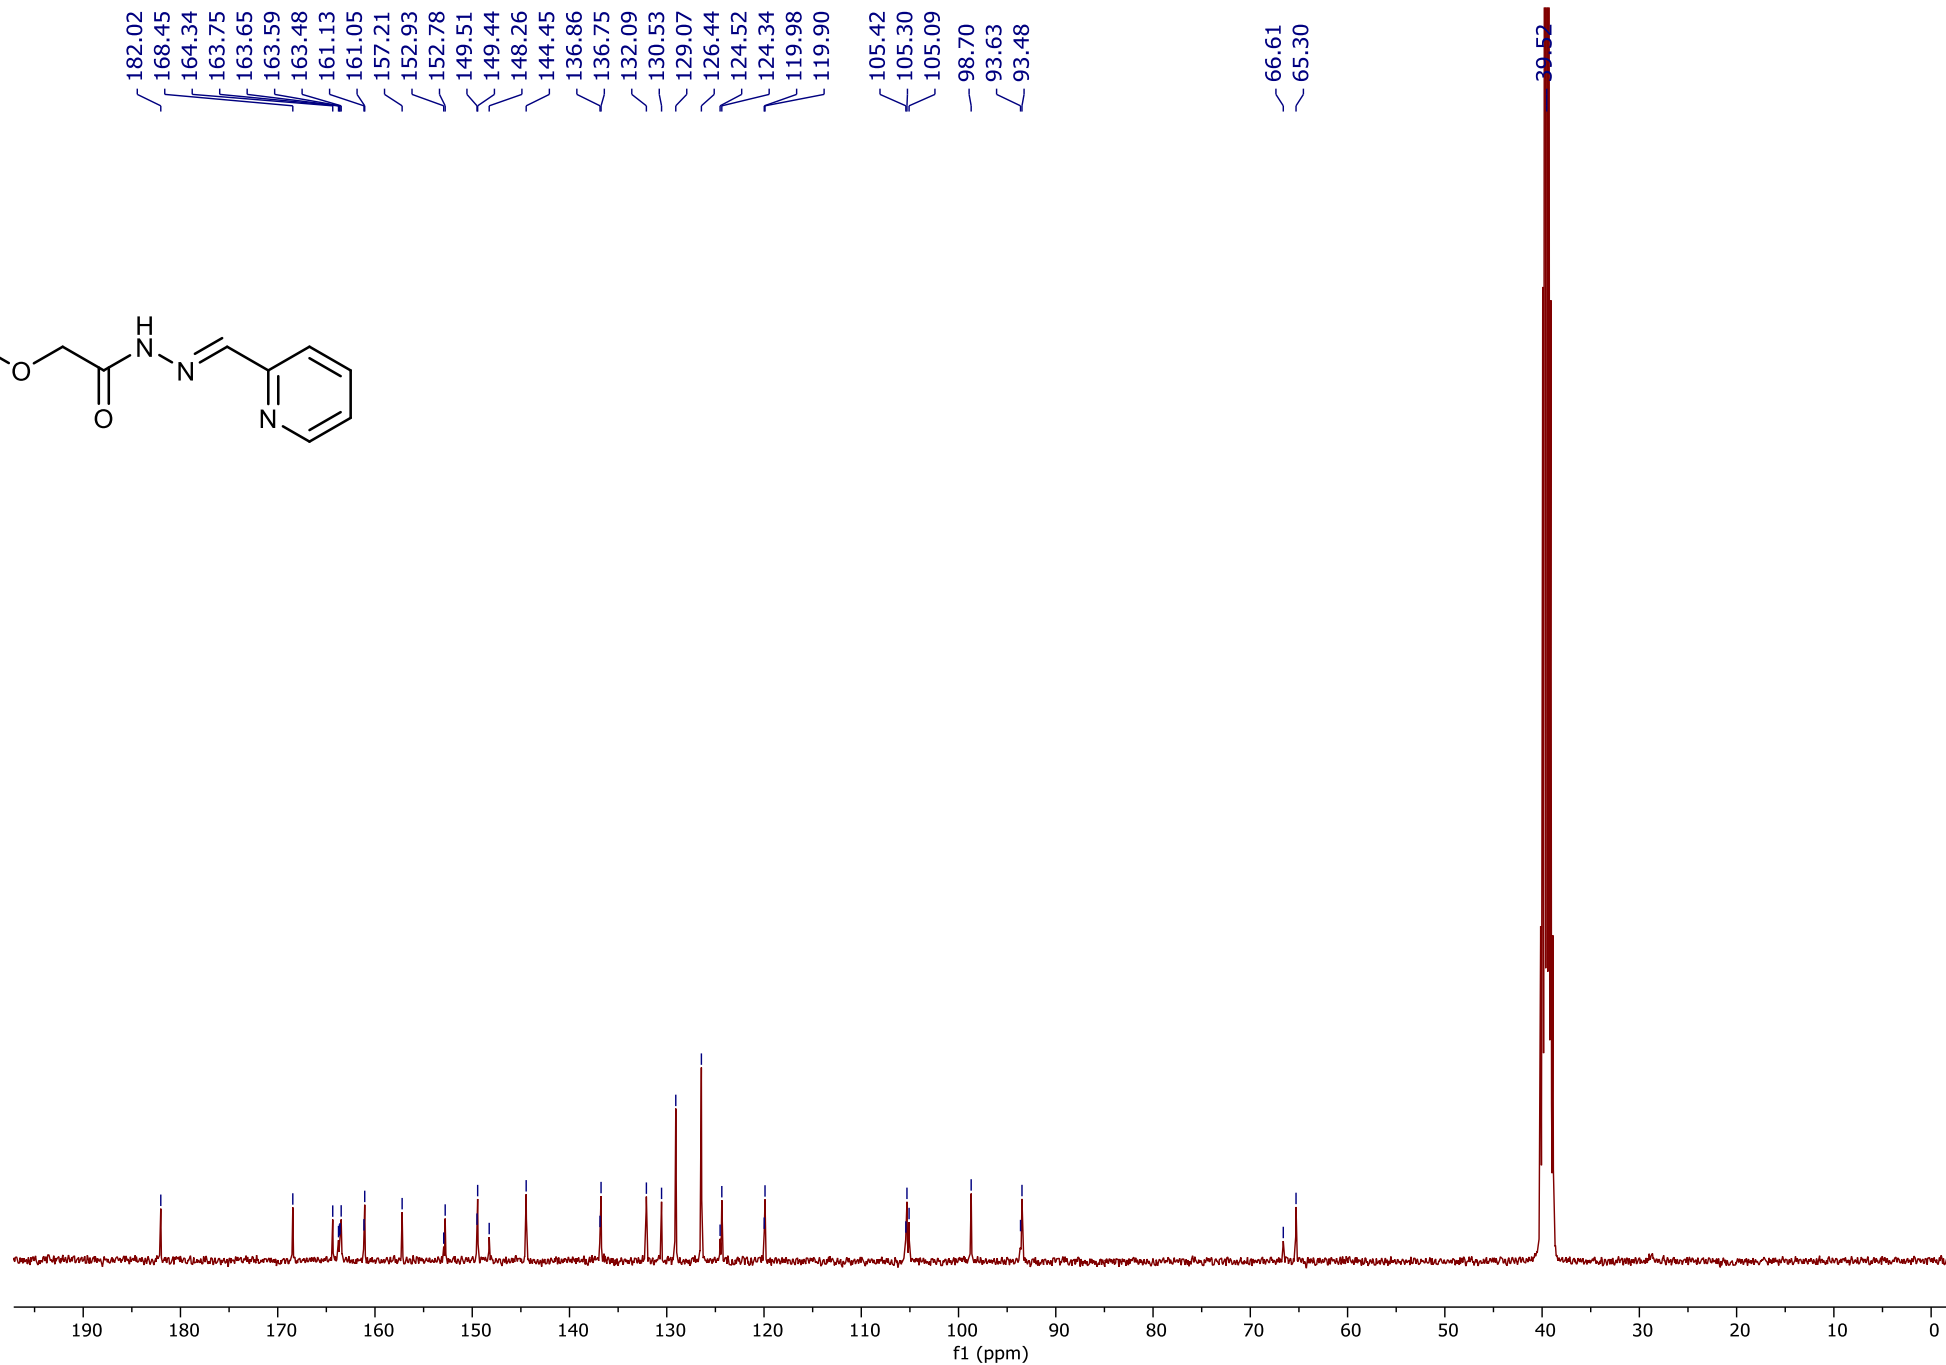

**S28.**  $^{13}\text{C}$  NMR of Compound **4m**

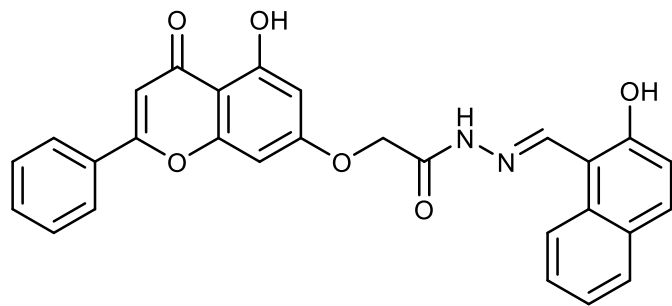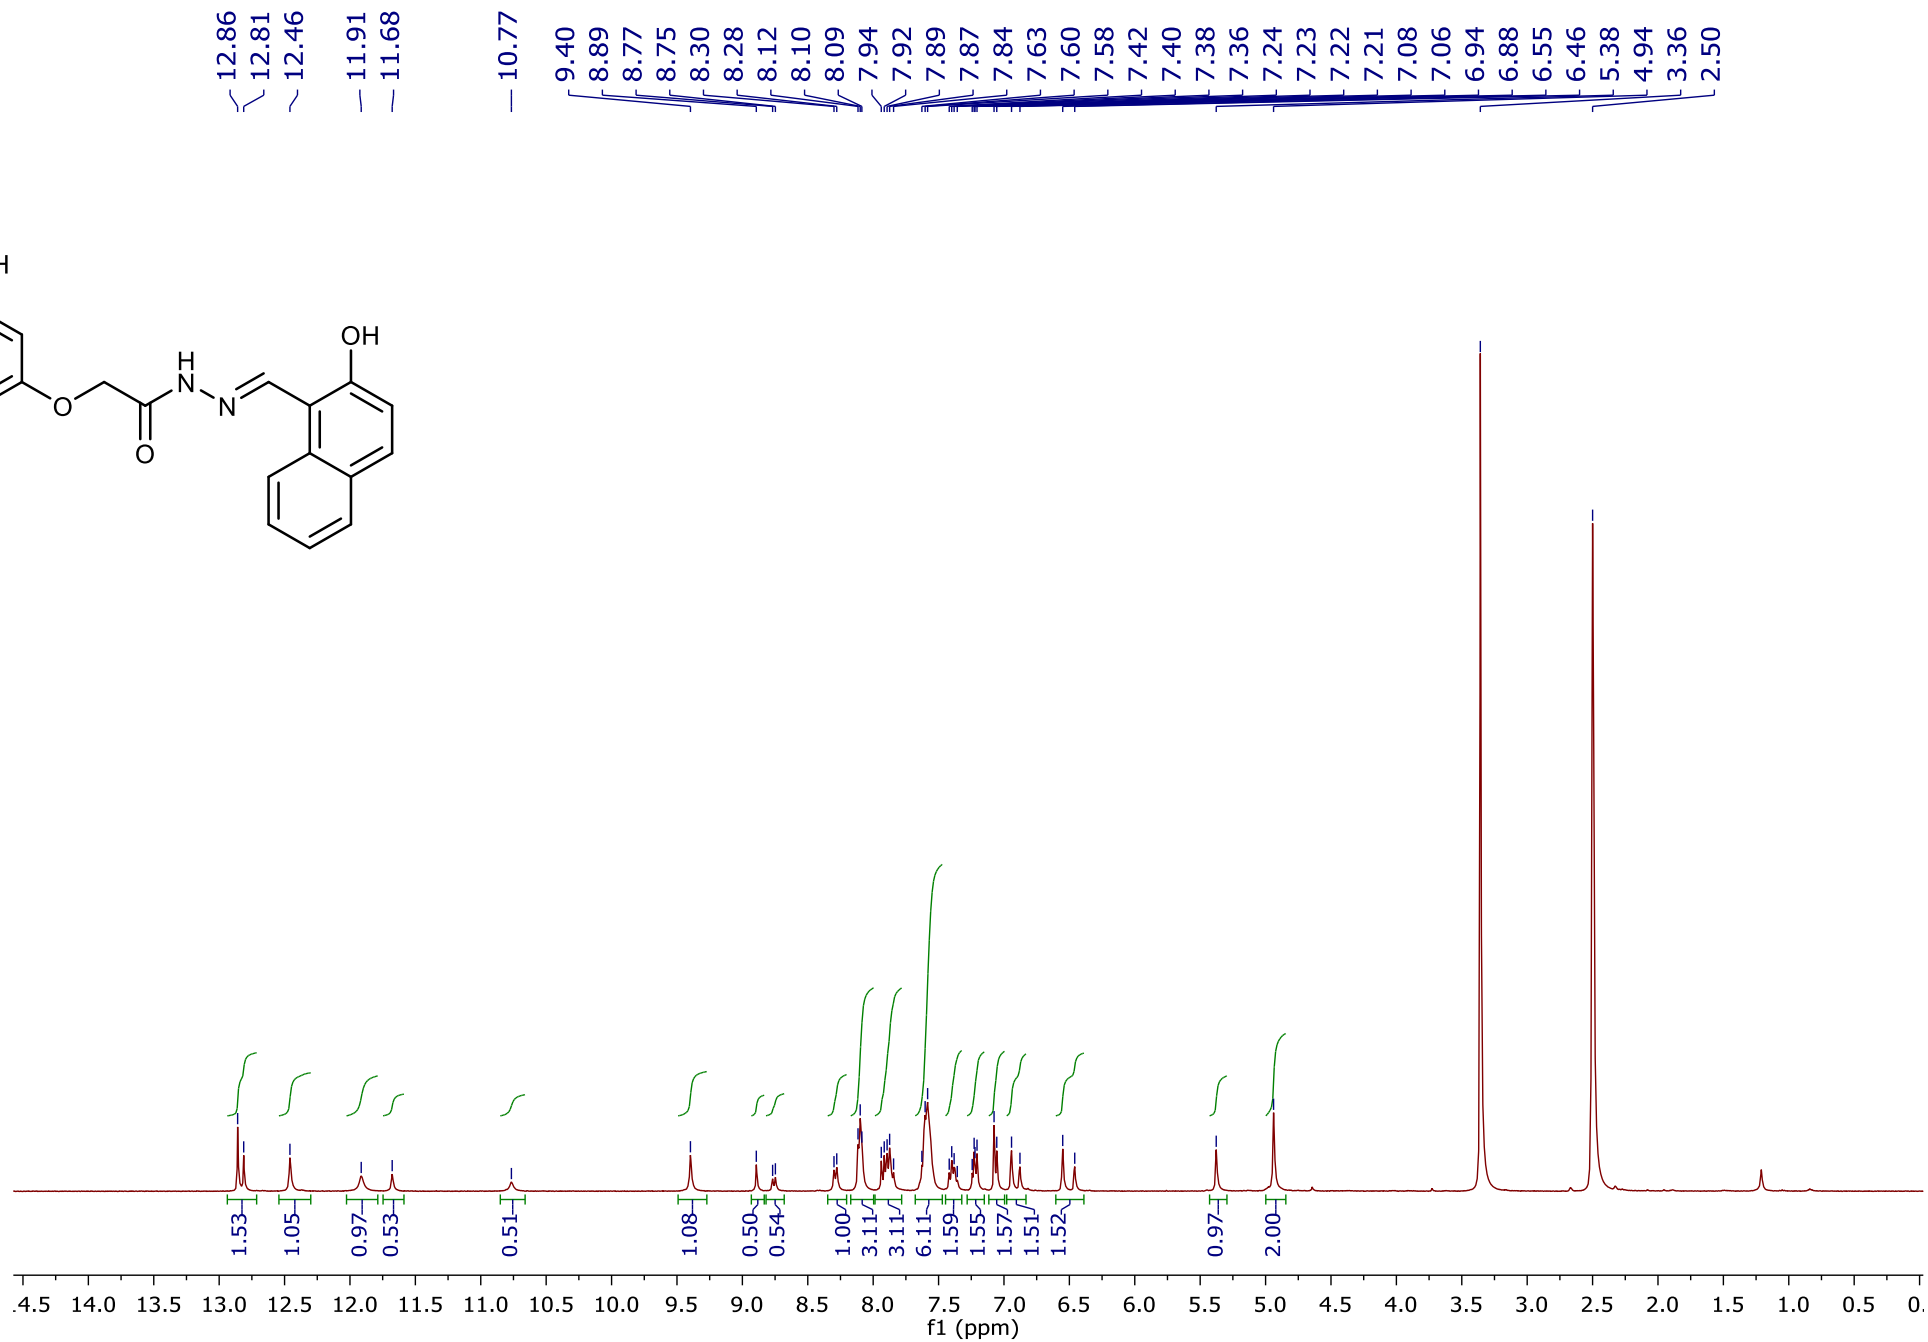

**S29.**  $^1\text{H}$  NMR of Compound **4n**

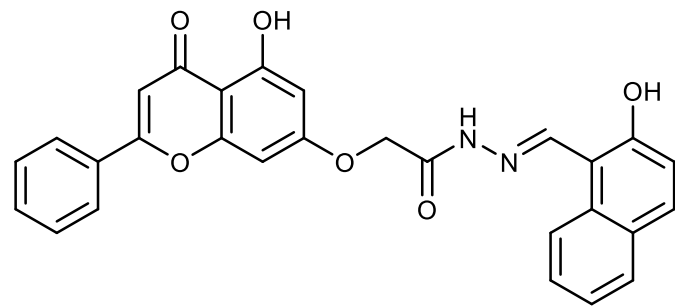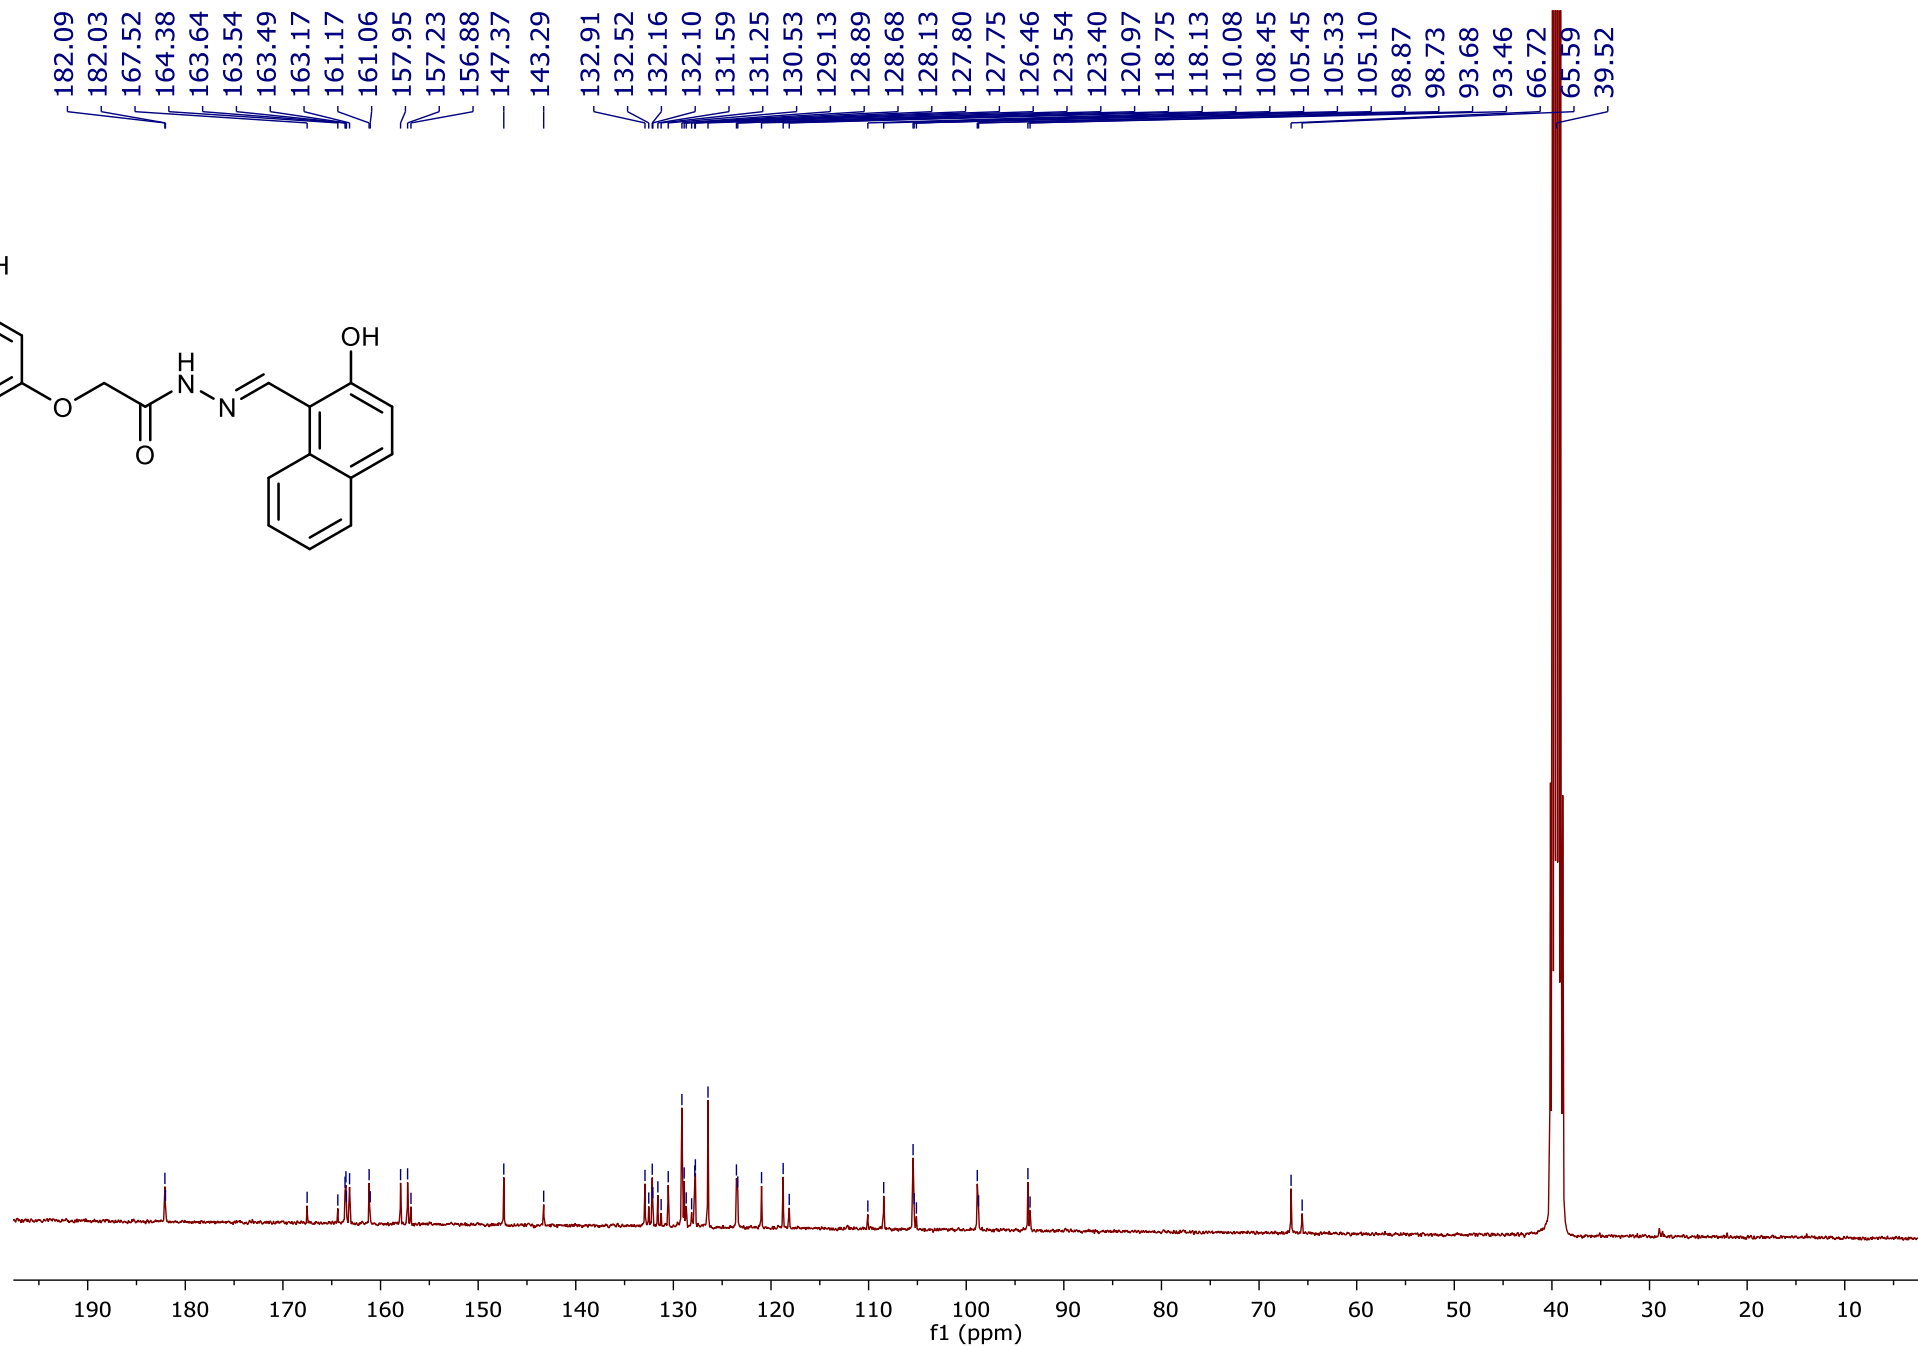

**S30.**  $^{13}\text{C}$  NMR of Compound **4n**

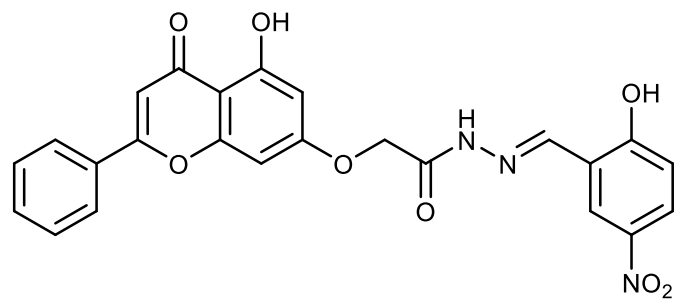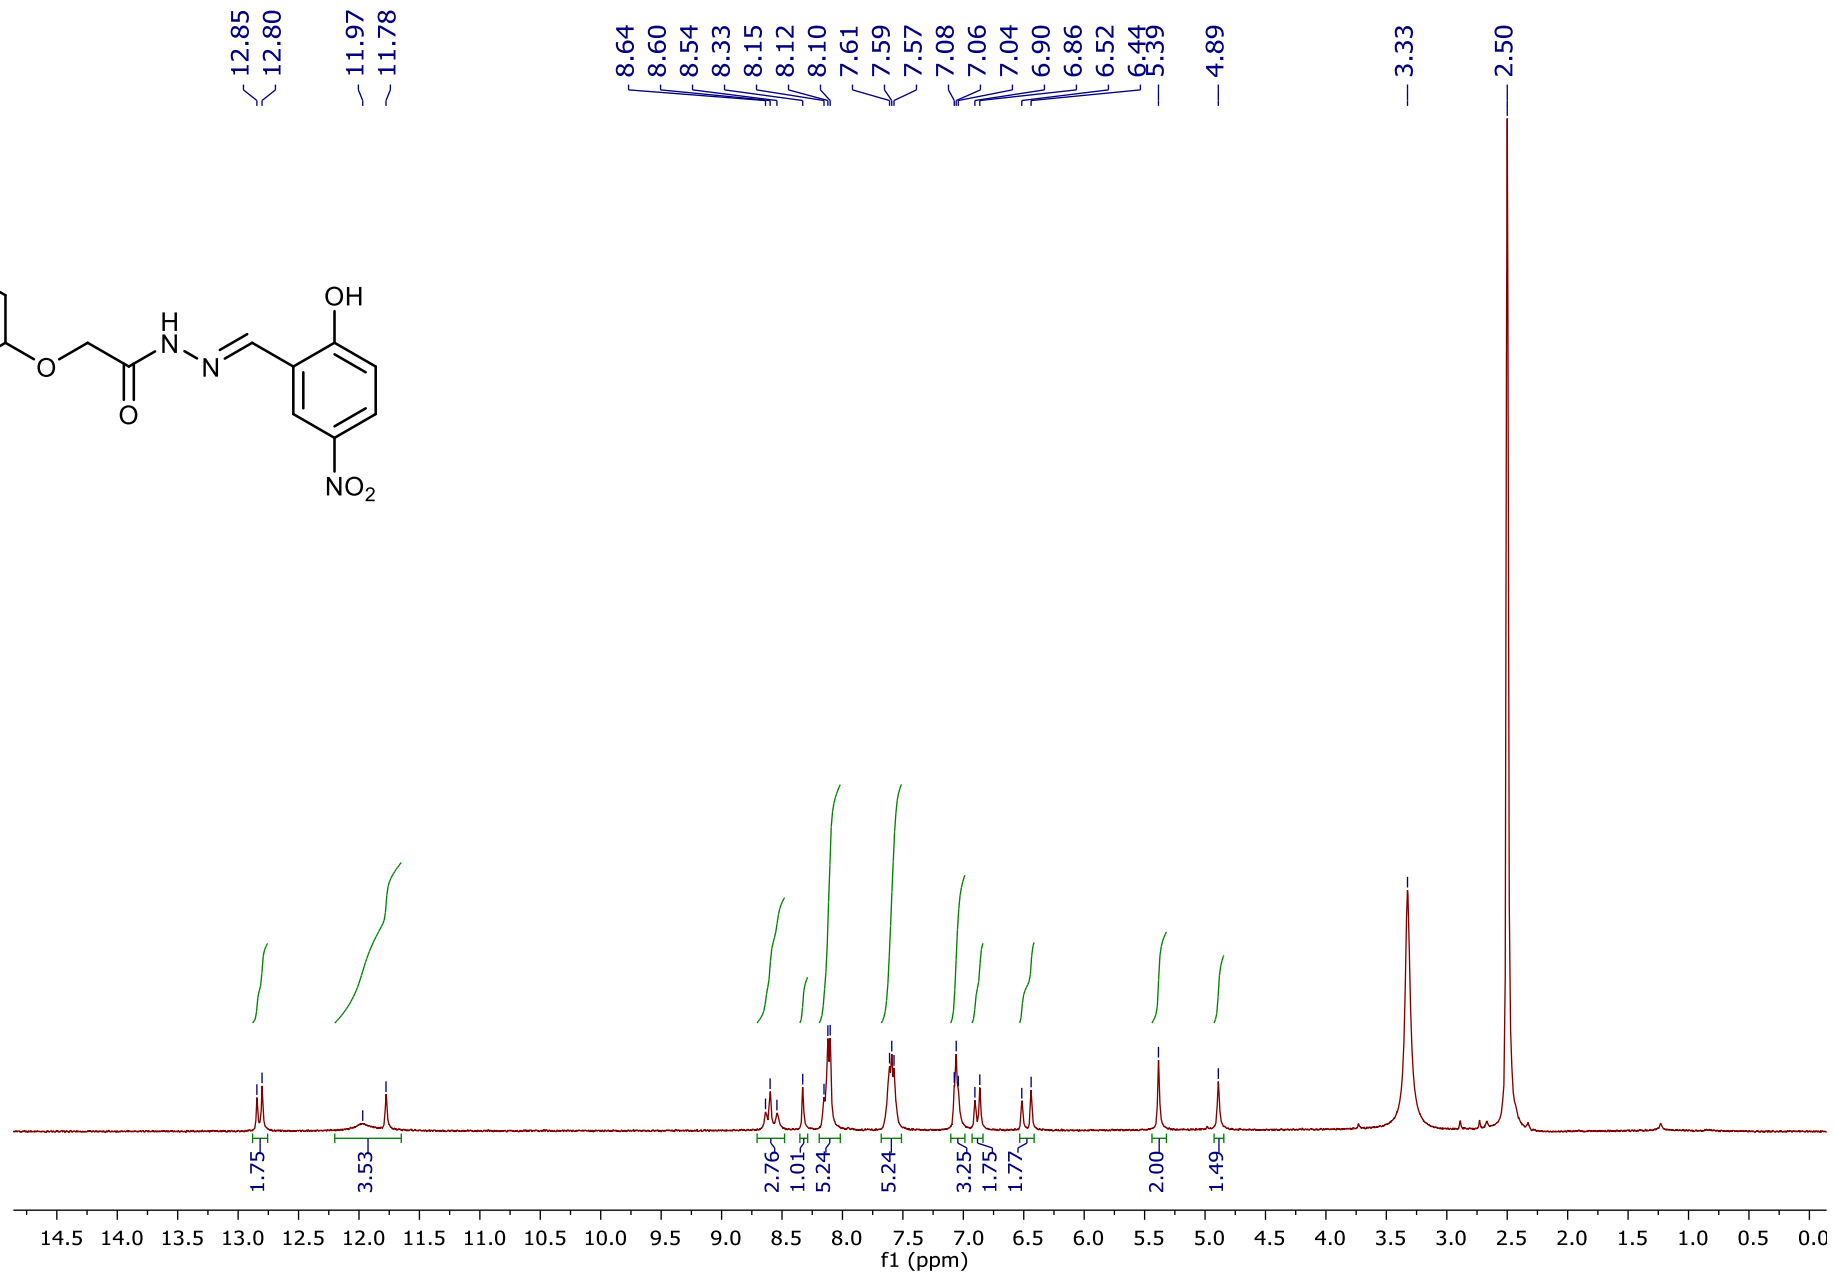

**S31.** <sup>1</sup>H NMR of Compound **4o**

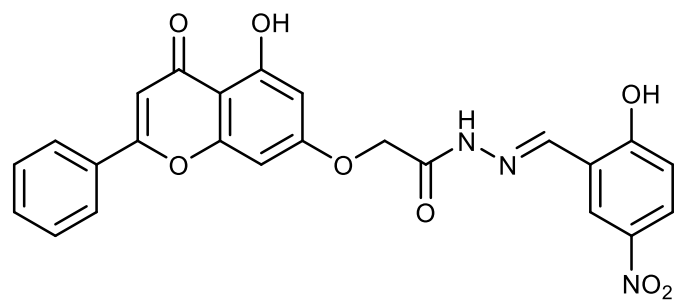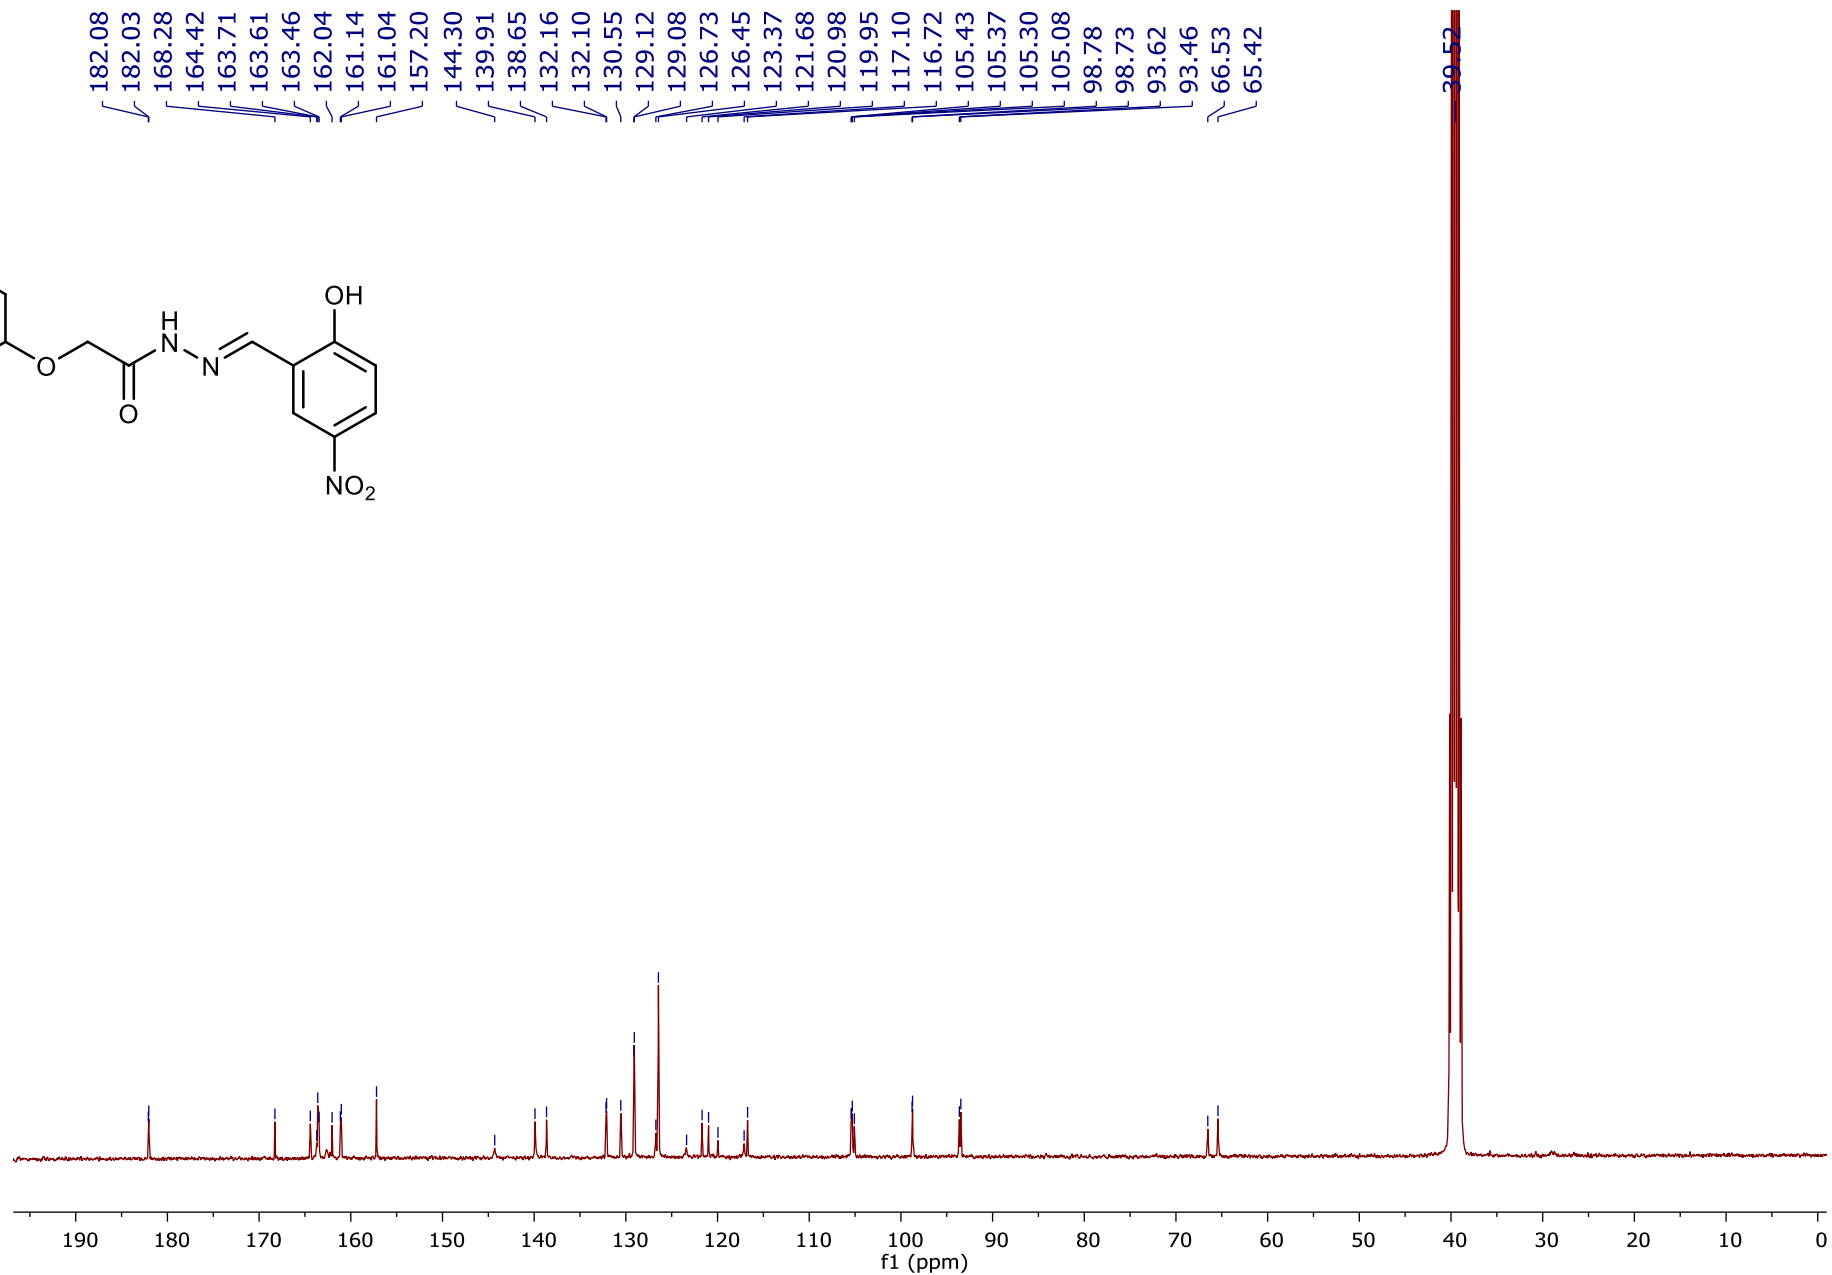

**S32.** <sup>13</sup>C NMR of Compound **4o**
